# Supplementary material for: A Comprehensive Resource of Interacting Protein Regions for Refining Human Transcription Factor Networks
Source: PLOS journal article supplement (doi:10.1371/journal.pone.0009289), 2010-02-23

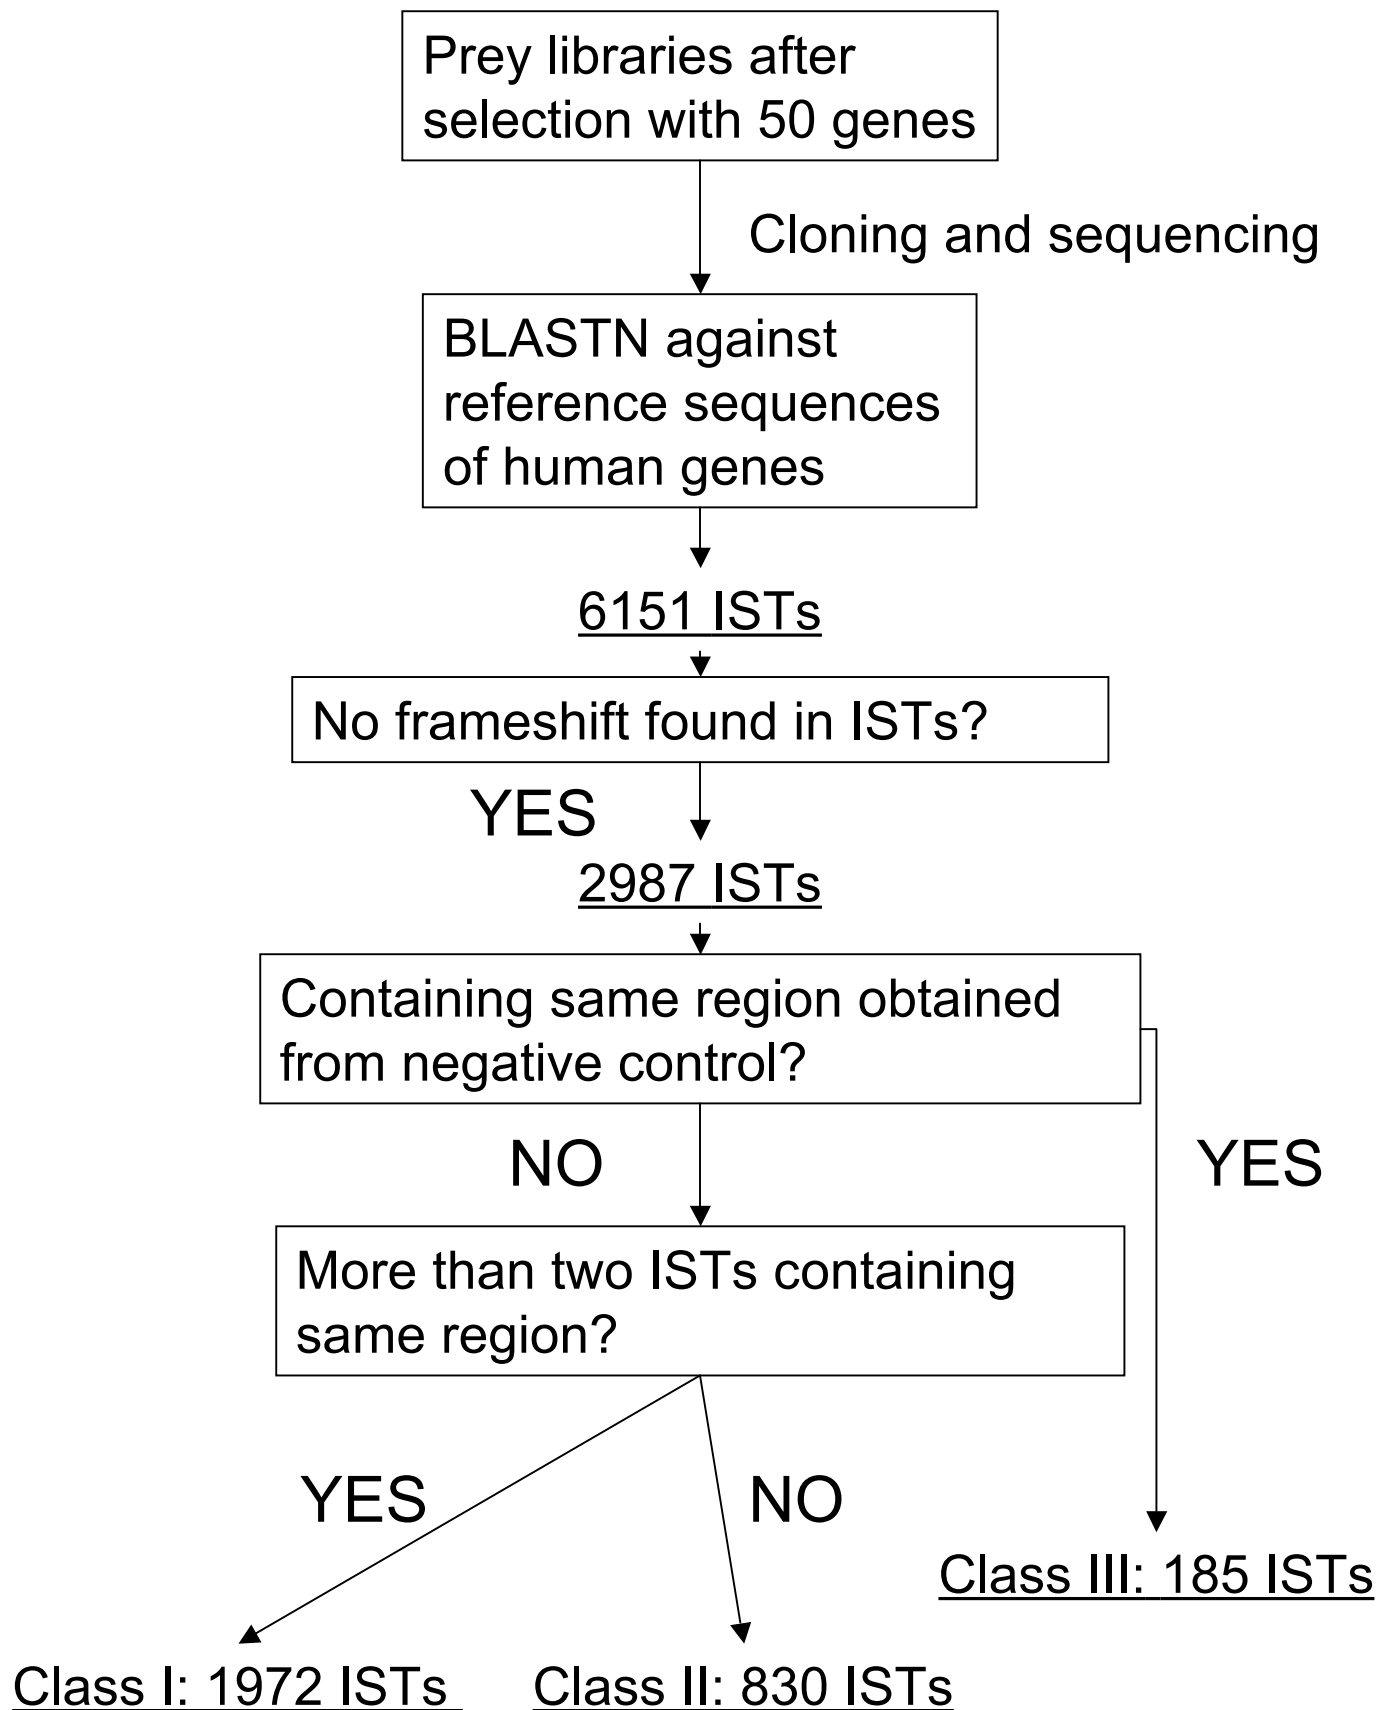

Supplement: S3 (10.1371/journal.pone.0009289.s003) [file journal.pone.0009289.s003]
