# Supplementary material for: A Comprehensive Resource of Interacting Protein Regions for Refining Human Transcription Factor Networks
Source: PLOS journal article supplement (doi:10.1371/journal.pone.0009289), 2010-02-23
Supplement: S16 (10.1371/journal.pone.0009289.s016) [file journal.pone.0009289.s016]

**Table S3. List of PCR programs used for amplification of bait cDNA templates.**

| Program number | program                                                                                                                                                             |
|----------------|---------------------------------------------------------------------------------------------------------------------------------------------------------------------|
| 1              | 1cycle of 98°C for 2min, 15cycles of 98°C for 30sec 62°C for 30sec and 72°C for 2min, and 1cycle of 72°C for 15min.                                                 |
| 2              | 1cycle of 98°C for 2min, 15cycles of 98°C for 30sec, 62°C for 30sec and 72°C for 4min, and 1cycle of 72°C for 15min.                                                |
| 3              | 1cycle of 98°C for 1min, 4cycles of 98°C for 30sec and 72°C for 1min, 4cycles of 98°C for 30sec and 70°C for 1min, and 24cycles of 98°C for 30sec and 68°C for 1min |
| 4              | 1cycle of 98°C for 1min, 4cycles of 98°C for 30sec and 72°C for 2min, 4cycles of 98°C for 30sec and 70°C for 2min, and 24cycles of 98°C for 30sec and 68°C for 2min |
| 5              | 1cycle of 98°C for 1min, 4cycles of 98°C for 30sec and 72°C for 3min, 4cycles of 98°C for 30sec and 70°C for 3min, and 24cycles of 98°C for 30sec and 68°C for 3min |
| 6              | 1cycle of 98°C for 1min, 4cycles of 98°C for 30sec and 72°C for 2min, 4cycles of 98°C for 30sec and 70°C for 2min, and 5 cycles of 98°C for 30sec and 68°C for 2min |
| 7              | 1cycle of 98°C for 2min, and 25cycles of 98°C for 15sec 62°C for 30sec and 68°C for 3min.                                                                           |
| 8              | 1cycle of 95°C for 1min, 35cycles of 95°C for 1min, 60°C for 1min, and 72°C for 1min                                                                                |

See also Figure S1 and Tables S1-2.
