# Supplementary material for: A Comprehensive Resource of Interacting Protein Regions for Refining Human Transcription Factor Networks
Source: PLOS journal article supplement (doi:10.1371/journal.pone.0009289), 2010-02-23
Supplement: S21 (10.1371/journal.pone.0009289.s021) [file journal.pone.0009289.s021]

**Table S8. Increase of LC PPIs by the IVV and Y2H data sets.**

|                       | Baits | <i>A</i>         |                           | <i>B</i> |                                    | Ratio of <i>A</i> to <i>B</i> |       |
|-----------------------|-------|------------------|---------------------------|----------|------------------------------------|-------------------------------|-------|
|                       |       | PPIs newly added | Nodes (genes) newly added | LC PPIs  | Nodes (genes) originally presented | PPIs                          | Genes |
| IVV (Core)            | 50    | 932              | 612                       | 1240     | 748                                | 0.75                          | 0.82  |
| Y2H (TF) <sup>§</sup> | 116   | 372              | 172                       | 776      | 542                                | 0.48                          | 0.32  |

The expansion of the available PPI network with the IVV core data set and the Y2H data set is shown within each TF network. **§** : Interactions are limited to those that include bait proteins having the GO assignment ‘transcription regulator activity’ or ‘transcription factor activity’.
