# Supplementary material for: A Comprehensive Resource of Interacting Protein Regions for Refining Human Transcription Factor Networks
Source: PLOS journal article supplement (doi:10.1371/journal.pone.0009289), 2010-02-23
Supplement: S22 (10.1371/journal.pone.0009289.s022) [file journal.pone.0009289.s022]

**Table S9. Comparison of the network characteristics.**

|                             | Degree distribution:<br>$P(k) \propto k^{-r}$ | Clustering coefficient:<br>$C(k) \propto k^{-r}$ | Neighbor connectivity:<br>$N(k) \propto k^r$ | Mean path length | Mean clustering coefficient |
|-----------------------------|-----------------------------------------------|--------------------------------------------------|----------------------------------------------|------------------|-----------------------------|
| IVV (Core)                  | $r=1.21$ ( $R^2=0.72$ )                       | $r=0.82$ ( $R^2=0.52$ )                          | $r=0.85$ ( $R^2=0.53$ )                      | 4.35             | 0.005                       |
| Y2H (Stelzl <i>et al.</i> ) | $r=1.65$ ( $R^2=0.91$ )                       | $r=0.51$ ( $R^2=0.33$ )                          | $r=0.32$ ( $R^2=0.55$ )                      | 4.86             | 0.006                       |
| Y2H (Rual <i>et al.</i> )   | $r=1.54$ ( $R^2=0.89$ )                       | $r=0.81$ ( $R^2=0.54$ )                          | $r=0.38$ ( $R^2=0.66$ )                      | 4.36             | 0.028                       |
| LC (50 TFs) <sup>§</sup>    | $r=1.07$ ( $R^2=0.73$ )                       | $r=1.01$ ( $R^2=0.78$ )                          | $r=0.70$ ( $R^2=0.73$ )                      | 3.49             | 0.099                       |

$r$  indicates the slope of the approximate straight line on a log-log plot graph corresponding to each distribution.

§ : Indicates LC PPIs that have direct relationships with the 50 TF proteins used as bait in the IVV experiment.
