# Supplementary material for: A Comprehensive Resource of Interacting Protein Regions for Refining Human Transcription Factor Networks
Source: PLoS One. 2010 Feb 24;5(2):e9289. doi: 10.1371/journal.pone.0009289 (PMC2827538; doi:10.1371/journal.pone.0009289)
Supplement: Table S1 — List of bait proteins. Entrez Gene IDs, Official Symbols and GenBank accession numbers of bait proteins are shown. Positions indicate the region of the sequence corresponding to the accession number. ‘BasePair’ and ‘Weight’ indicate the length and molecular weight of the bait protein. Primers 1 to 5 are the primer names (see Table S2). The program names refer to the PCR programs (see Table S3). NG in the ‘Selection result’ column indicates that the bait protein obtained no prey interactors. An asterisk indicates that the bait protein cDNA was prepared as described previously. Although the 2nd PCR was normally performed with the 5′baitCBP and 3′FosCBPzz primers (See ‘Preparation of bait mRNA templates’ in Supporting Methods), construction of ProteinID 60 with a 3′ deletion required an additional 2nd PCR step using the 5′TAF9_2ND_012B and 3′FosCBPzz primers with PCR program #1 for preparation of the full-length template (see Figure S1). (0.05 MB XLS) [file pone.0009289.s014.xls]

## Sheet: Table S1
Table S1 List of bait proteins
Bait ProteinID	GeneID	Symbol	Accession	Position	BasePair	Weight (kDa)	1st PCR primer		3rd PCR primer		4th PCR primer		Program Name			Transcription Result	Western Result	Selection Result
							Primer 1	Primer 2	Primer 1	Primer 4	primer5	Primer 4	1st PCR	3rd PCR	4th PCR
1	1386	ATF2	AK128731	all	2165	74.8	5'ATF2_1ST_048A	3'ATF2_1ST_048A	5'ATF2_1ST_048A	3'FosCBPzz+3	5'SP6(O')T7	3'FosCBPzz+3	No. 4	No. 1	No. 1	OK	OK	OK
2	11016	ATF7	NM_006856	1030..1197	887	29.2	5'ATF7_1ST_033A_pr	3'ATF7_1ST_033A_pr	5'ATF7_1ST_033A_pr	3'FosCBPzz	5'SP6(O')T7	3'FosCBPzz	No. 1	No. 1	No. 1	OK	OK	OK
3	11016	ATF7	NM_006856	all	2168	74.6	5'ATF7_1ST_018H	3'ATF7_1ST_018H	5'ATF7_1ST_018H	3'FosCBPzz	5'SP6(O')T7	3'FosCBPzz	No. 1	No. 5	No. 1	OK	OK	NG
4	865	CBFB	BC018509	all	1265	44.4	5'CBFB_1ST_036H	3'CBFB_1ST_036H	5'CBFB_1ST_036H	3'FosCBPzz	5'SP6(O')T7	3'FosCBPzz	No. 1	No. 1	No. 1	OK	OK	OK
5	25920	COBRA1	BC011892	all	2144	76.8	5'COBRA1_1ST_036G_68	3'COBRA1_1ST_036G_68	5'COBRA1_1ST_036G_68	3'FosCBPzz+3	5'SP6(O')T7	3'FosCBPzz	No. 1	No. 1	No. 1	OK	OK	OK
6	1499	CTNNB1	NM_001904	all	3062	108.3	5'CTNNB1_1ST_011G	3'CTNNB1_1ST_011G	5'CTNNB1_1ST_011G	3'FosCBPzz	5'SP6(O')T7	3'FosCBPzz	No. 1	No. 1	No. 1	OK	OK	OK
7	1499	CTNNB1	NM_001904	1..549	1268	43.2	5'CTNNB1_1ST_011G	3'CTNNB1_1st	5'CTNNB1_1ST_011G	3'FosCBPzz	5'SP6(O')T7	3'FosCBPzz	No. 1	No. 1	No. 1	OK	OK	OK
8	9191	DEDD	NM_032998	all	1673	59.7	5'DEDD_1ST_008D	3'DEDD_1ST_008D	5'DEDD_1ST_008D	3'FosCBPzz	5'SP6(O')T7	3'FosCBPzz	No. 1	No. 1	No. 1	OK	OK	OK
9	1869	E2F1	BC050369	1138..1311	893	29.4	5'E2F1_1ST_039B_68m	3'E2F1_1ST_039A_68	5'E2F1_1ST_039B_68m	3'FosCBPzz_68	5'SP6(O')T7	3'FosCBPzz	No. 1	No. 1	No. 1	OK	OK	OK
10	1936	EEF1D	NM_001960	all	1562	54	5'EEF1D_1ST_018E_68	3'EEF1D_1ST_018E_68	5'EEF1D_1ST_018E_68	3'FosCBPzz_68	5'SP6(O')T7	3'FosCBPzz	No. 1	No. 1	No. 1	OK	OK	OK
11	1936	EEF1D	NM_001960	370..486	836	27.1	5'EEF1D_1ST_027C_pr	3'EEF1D_1ST_027C_pr	5'EEF1D_1ST_027C_pr	3'FosCBPzz	5'SP6(O')T7	3'FosCBPzz	No. 1	No. 1	No. 1	OK	OK	OK
12	2113	ETS1	NM_005238	all	2044	73.3	5'ETS1_1ST_005G	3'ETS1_1ST_005G	5'ETS1_1ST_005G	3'FosCBPzz+1	5'SP6(O')T7	3'FosCBPzz+1	No. 1	No. 1	No. 1	OK	OK	OK
13	2113	ETS1	NM_005238	1000..1254	974	33.2	5'ETS1_1st	3'ETS1_1st	5'ETS1_1st	3'FosCBPzz	5'SP6(O')T7	3'FosCBPzz	No. 1	No. 1	No. 1	OK	OK	OK
14	2353	FOS	NM_005252	all	1859	63.6	5'O'T7_FOS_ALL	3'CBP_FOS_ALL	5'O'T7_FOS_ALL	3'FosCBPzz	5'SP6(O')T7	3'FosCBPzz	No. 1	No. 1	No. 1	OK	OK	OK
15*	2353	FOS	NM_005252	349..633	1004	33.7	-	-	-	-	5'SP6(O')T7	3'FosCBPzz	-	-	No. 8	OK	OK	OK
16	2963	GTF2F2	NM_004128	all	1466	51.2	5'GTF2F2_1ST_005B	3'GTF2F2_1ST_005B	5'GTF2F2_1ST_005B	3'FosCBPzz	5'SP6(O')T7	3'FosCBPzz	No. 1	No. 1	No. 1	OK	OK	OK
17	57801	HES4	BC012351	all	1382	46.4	5'HES4_1ST_030B	3'HES4_1ST_030B	5'HES4_1ST_030B	3'FosCBPzz	5'SP6(O')T7	3'FosCBPzz	No. 7	No. 1	No. 7	OK	OK	OK
18	3725	JUN	NM_002228	all	1712	58.5	5'O'T7_JUN_ALL	3'CBP_JUN_ALL	5'O'T7_JUN_ALL	3'FosCBPzz	5'SP6(O')T7	3'FosCBPzz	No. 3	No. 3	No. 3	OK	OK	OK
19*	3725	JUN	NM_002228	502..957	1175	39.8	-	-	-	-	5'SP6(O')T7	3'FosCBPzz	-	-	No. 8	OK	OK	OK
20	3726	JUNB	NM_002229	all	1760	58.7	5'JUNB_1ST_005E	3'JUNB_1ST_005E	5'JUNB_1ST_005E	3'FosCBPzz+1	5'SP6(O')T7	3'FosCBPzz+1	No. 1	No. 4	No. 4	OK	OK	OK
21	3726	JUNB	NM_002229	841..990	869	28.4	5'JUNB_1ST_027H_68pr	3'JUNB_1ST_027H_68pr	5'JUNB_1ST_027H_68pr	3'FosCBPzz_68	5'SP6(O')T7	3'FosCBPzz	No. 1	No. 1	No. 1	OK	OK	OK
22	3727	JUND	NM_005354	835..990	875	28.8	5'JUND_1ST_027B_68pr	3'JUND_1ST_027B_68pr	5'JUND_1ST_027B_68pr	3'FosCBPzz_68	5'SP6(O')T7	3'FosCBPzz	No. 1	No. 1	No. 1	OK	OK	OK
23	29956	LASS2	AK001105	all	1409	49.8	5'LASS2_1ST_051C	3'LASS2_1ST_051C	5'LASS2_1ST_051C	3'FosCBPzz	5'SP6(O')T7	3'FosCBPzz	No. 1	No. 1	No. 1	OK	OK	OK
24	4149	MAX	NM_002382	all	1199	41.1	5'MAX_1ST_005D	3'MAX_1ST_005D	5'MAX_1ST_005D	3'FosCBPzz	5'SP6(O')T7	3'FosCBPzz	No. 1	No. 1	No. 1	OK	OK	OK
25	4193	MDM2	BC009893	all	2192	78.1	5'MDM2_1ST_024F	3'MDM2_1ST_024F	5'MDM2_1ST_024F	3'FosCBPzz	5'SP6(O')T7	3'FosCBPzz	No. 4	No. 5	No. 1	OK	OK	OK
26	4193	MDM2	BC009893	1..564	1283	44.2	human_5'T7+mdm2	3'bait_hdm2_npirmer	human_5'T7+mdm2	3'FosCBPzz	5'SP6(O')T7	3'FosCBPzz	No. 1	No. 1	No. 1	OK	OK	OK
27	7978	MTERF	NM_006980	all	1916	68.6	5'MTERF_1ST_054B	3'MTERF_1ST_054B	5'MTERF_1ST_054B	3'FosCBPzz	5'SP6(O')T7	3'FosCBPzz	No. 1	No. 1	No. 1	OK	OK	OK
28	4602	MYB	BC064955	all	2639	95.2	5'MYB_1ST_030D	3'MYB_1ST_030D	5'MYB_1ST_030D	3'FosCBPzz	5'SP6(O')T7	3'FosCBPzz	No. 1	No. 1	No. 1	OK	OK	OK
29	4602	MYB	BC064955	268..579	1031	35.4	5'MYB_1ST_039D_m	3'MYB_1ST_039D_m	5'MYB_1ST_039D_m	3'FosCBPzz	5'SP6(O')T7	3'FosCBPzz	No. 1	No. 1	No. 1	OK	OK	OK
30	4609	MYC	NM_002467	all	2036	71.7	5'MYC_1ST_005C	3'MYC_1ST_005C	5'MYC_1ST_005C	3'FosCBPzz	5'SP6(O')T7	3'FosCBPzz	No. 1	No. 4	No. 1	OK	OK	OK
31	4609	MYC	NM_002467	1063..1317	974	33.1	5'MYC_m2_1st	3'MYC_M1&2_1st	5'MYC_m2_1st	3'FosCBPzz	5'SP6(O')T7	3'FosCBPzz	No. 1	No. 1	No. 1	OK	OK	OK
32	4692	NDN	NM_002487	all	1682	58.9	5'NDN_1ST_015A	3'NDN_1ST_015A	5'NDN_1ST_015A	3'FosCBPzz	5'SP6(O')T7	3'FosCBPzz	No. 3	No. 1	No. 5	OK	OK	OK
33	4790	NFKB1	BC051765	all	3626	128.3	5'NFKB1_1ST_024E	3'NFKB1_1ST_024E	5'NFKB1_1ST_024E	3'FosCBPzz+1	5'SP6(O')T7	3'FosCBPzz+1	No. 5	No. 5	No. 2	OK	ND	OK
34	4790	NFKB1	BC051765	31..1200	1889	65.7	5'NFKB1_1st	3'NFKB1_1st	5'NFKB1_1st	3'FosCBPzz	5'SP6(O')T7	3'FosCBPzz	No. 1	No. 1	No. 1	OK	OK	OK
35	2063	NR2F6	XM_373407	all	1931	65.8	5'NR2F6_1ST_024C_68	3'NR2F6_1ST_024C_68	5'NR2F6_1ST_024C_68	3'FosCBPzz_68	5'SP6(O')T7	3'FosCBPzz+1	No. 4	No. 1	No. 5	OK	OK	OK
36	2908	NR3C1	NM_000176	all	3050	108.5	5'NR3C1_1ST_011H	3'NR3C1_1ST_011H	5'NR3C1_1ST_011H	3'FosCBPzz	5'SP6(O')T7	3'FosCBPzz	No. 1	No. 1	No. 1	OK	OK	OK
37	2908	NR3C1	NM_000176	229..786	1277	42.8	5'NR3C1_1st	3'NR3C1_1st	5'NR3C1_1st	3'FosCBPzz	5'SP6(O')T7	3'FosCBPzz	No. 1	No. 1	No. 1	OK	OK	OK
38	3164	NR4A1	NM_002135	all	2513	87.3	5'NR4A1_1ST_015C	3'NR4A1_1ST_015C	5'NR4A1_1ST_015C	3'FosCBPzz	5'SP6(O')T7	3'FosCBPzz	No. 1	No. 5	No. 1	OK	OK	OK
39	3164	NR4A1	NM_002135	1..807	1526	50.5	5'NR4A1_1ST_015C	3'NR4A1_1st	5'NR4A1_1ST_015C	3'FosCBPzz	5'SP6(O')T7	3'FosCBPzz	No. 1	No. 1	No. 1	OK	OK	OK
40	4929	NR4A2	NM_173172	all	2084	73.3	5'NR4A2_1ST_054C	3'NR4A2_1ST_054C	5'NR4A2_1ST_054C	3'FosCBPzz	5'SP6(O')T7	3'FosCBPzz	No. 4	No. 4	No. 1	OK	ND	OK
41	10133	OPTN	AK055403	460..558	818	26.4	5'OPTN_1ST_051G_m	3'OPTN_1ST_051G_m	5'OPTN_1ST_051G_m	3'FosCBPzz	5'SP6(O')T7	3'FosCBPzz	No. 3	No. 5	No. 3	OK	OK	OK
42	7849	PAX8	NM_013951	all	1880	64.6	5'PAX8_1ST_015H	3'PAX8_1ST_015H	5'PAX8_1ST_015H	3'FosCBPzz	5'SP6(O')T7	3'FosCBPzz	No. 1	No. 1	No. 1	OK	OK	OK
43	5092	PCBD	NM_000281	all	1031	34.9	5'PCBD_1ST_024A	3'PCBD_1ST_024A	5'PCBD_1ST_024A	3'FosCBPzz	5'SP6(O')T7	3'FosCBPzz	No. 1	No. 1	No. 1	OK	OK	OK
44	5245	PHB	NM_002634	all	1535	52.7	5'PHB_1ST_015D	3'PHB_1ST_015D	5'PHB_1ST_015D	3'FosCBPzz	5'SP6(O')T7	3'FosCBPzz	No. 1	No. 1	No. 1	OK	OK	OK
45	5308	PITX2	AK127829	all	1670	58.2	5'PITX2_1ST_048H	3'PITX2_1ST_048H	5'PITX2_1ST_048H	3'FosCBPzz+3	5'SP6(O')T7	3'FosCBPzz+3	No. 3	No. 1	No. 1	OK	OK	OK
46	5468	PPARG	NM_005037	all	2144	77.3	5'PPARG_1ST_015B	3'PPARG_1ST_015B	5'PPARG_1ST_015B	3'FosCBPzz	5'SP6(O')T7	3'FosCBPzz	No. 1	No. 1	No. 1	OK	OK	OK
47	5573	PRKAR1A	NM_002734	all	1862	65.8	5'PRKAR1A_1ST_015E68	3'PRKAR1A_1ST_015E68	5'PRKAR1A_1ST_015E68	3'FosCBPzz_68	5'SP6(O')T7_68	3'FosCBPzz_68	No. 1	No. 1	No. 1	OK	OK	OK
48	5881	RAC3	NM_005052	all	1295	44.2	5'RAC3_1ST_054E	3'RAC3_1ST_054E	5'RAC3_1ST_054E	3'FosCBPzz	5'SP6(O')T7	3'FosCBPzz	No. 1	No. 1	No. 1	OK	OK	OK
49	5925	RB1	BC040540	1135..2784	2369	86	5'RB1_1ST_039C_m	3'RB1_1ST_030A	5'RB1_1ST_039C_m	3'FosCBPzz	5'SP6(O')T7	3'FosCBPzz	No. 1	No. 1	No. 1	OK	OK	OK
50	6257	RXRB	NM_021976	1..819	1538	51.2	5'RXRB_1ST_021H_68	3'RXRB_1st_68	5'RXRB_1ST_021H_68	3'FosCBPzz_68	5'SP6(O')T7	3'FosCBPzz	No. 3	No. 4	No. 1	OK	ND	OK
51	6258	RXRG	NM_006917	all	2108	73.7	5'RXRG_1ST_021G	3'RXRG_1ST_021G	5'RXRG_1ST_021G	3'FosCBPzz	5'SP6(O')T7	3'FosCBPzz	No. 1	No. 1	No. 1	OK	OK	OK
52	29970	SCHIP1	BC036535	all	2177	76.7	5'SCHIP1_1ST_018G	3'SCHIP1_1ST_018G	5'SCHIP1_1ST_018G	3'FosCBPzz	5'SP6(O')T7	3'FosCBPzz	No. 4	No. 4	No. 6	OK	OK	OK
53	29970	SCHIP1	BC036535	916..1458	1262	43.4	5'SCHIP1_1st	3'SCHIP1_1st	5'SCHIP1_1st	3'FosCBPzz	5'SP6(O')T7	3'FosCBPzz	No. 1	No. 1	No. 1	OK	OK	OK
54	29970	SCHIP1	BC036535	1204..1437	953	31.9	5'SCHIP1_1ST_027A_pr	3'SCHIP1_1ST_027A_pr	5'SCHIP1_1ST_027A_pr	3'FosCBPzz	5'SP6(O')T7	3'FosCBPzz	No. 1	No. 1	No. 1	OK	OK	OK
55	4087	SMAD2	BC014840	all	2120	75.2	5'SMAD2_1ST_030E	3'SMAD2_1ST_030E	5'SMAD2_1ST_030E	3'FosCBPzz	5'SP6(O')T7	3'FosCBPzz	No. 1	No. 1	No. 1	OK	OK	OK
56	4087	SMAD2	BC014840	544..1401	1577	54.8	5'SMAD2_1ST_039F_m	3'SMAD2_1ST_030E	5'SMAD2_1ST_039F_m	3'FosCBPzz	5'SP6(O')T7	3'FosCBPzz	No. 1	No. 1	No. 1	OK	OK	OK
57	6648	SOD2	NM_000636	all	1385	47.6	5'SOD2_1ST_011E	3'SOD2_1ST_011E	5'SOD2_1ST_011E	3'FosCBPzz	5'SP6(O')T7	3'FosCBPzz	No. 1	No. 1	No. 1	OK	OK	OK
58	6667	SP1	BC062539	all	3074	103.5	5'SP1_1ST_036F	3'SP1_1ST_036F	5'SP1_1ST_036F	3'FosCBPzz	5'SP6(O')T7	3'FosCBPzz	No. 1	No. 1	No. 1	OK	OK	OK
59	6667	SP1	BC062539	1834..2334	1220	41	5'SP1_1ST_039G_m	3'SP1_1ST_039G_m	5'SP1_1ST_039G_m	3'FosCBPzz	5'SP6(O')T7	3'FosCBPzz	No. 1	No. 1	No. 1	OK	OK	OK
60	6760	SS18	NM_001007559	all	1973	68.8	５’SYT/SSX_1	3'SYT_2	５’SYT/SSX_1	3'FosCBPzz	5'SP6(O')T7	3'FosCBPzz	No. 1	No. 1	No. 1	OK	OK	OK
61	6880	TAF9	NM_003187	all	1511	51.8	5'TAF9_1ST_005A	3'TAF9_1ST_011B	5'TAF9_1ST_005A	3'FosCBPzz+1	5'SP6(O')T7	3'FosCBPzz+1	No. 1	No. 1	No. 1	OK	OK	OK
62	6927	TCF1	NM_000545	all	2612	90.2	5'TCF1_1ST_036B	3'TCF1_1ST_036B	5'TCF1_1ST_036B	3'FosCBPzz	5'SP6(O')T7	3'FosCBPzz	No. 1	No. 1	No. 1	OK	OK	OK
63	6927	TCF1	NM_000545	1..900	1619	56.1	5'TCF1_1ST_036B	3'TCF1_1ST_039E_m	5'TCF1_1ST_036B	3'FosCBPzz	5'SP6(O')T7	3'FosCBPzz	No. 1	No. 1	No. 1	OK	OK	OK
64	7024	TFCP2	BC003634	all	2225	80.1	5'TFCP2_1ST_048C	3'TFCP2_1ST_048C	5'TFCP2_1ST_048C	3'FosCBPzz	5'SP6(O')T7	3'FosCBPzz	No. 1	No. 1	No. 1	OK	OK	OK
65	7124	TNF	BC028148	all	1418	48.5	5'TNF_1ST_030G	3'TNF_1ST_030G	5'TNF_1ST_030G	3'FosCBPzz	5'SP6(O')T7	3'FosCBPzz	No. 1	No. 1	No. 1	OK	OK	OK
66	7157	TP53	NM_000546	all	1898	66.6	5'O'T7_TP53_ALL	3'CBP_TP53_ALL	5'O'T7_TP53_ALL	3'FosCBPzz	5'SP6(O')T7	3'FosCBPzz	No. 1	No. 1	No. 1	OK	OK	OK
67	7291	TWIST1	BC036704	all	1325	43.8	5'TWIST1_1ST_030C	3'TWIST1_1ST_030C	5'TWIST1_1ST_030C	3'FosCBPzz	5'SP6(O')T7	3'FosCBPzz	No. 3	No. 4	No. 1	OK	OK	OK
68	7572	ZNF24	NM_006965	all	1823	65	5'ZNF24_1ST_054F	3'ZNF24_1ST_054F	5'ZNF24_1ST_054F	3'FosCBPzz	5'SP6(O')T7	3'FosCBPzz	No. 1	No. 1	No. 1	OK	OK	OK
