# Supplementary material for: A Comprehensive Resource of Interacting Protein Regions for Refining Human Transcription Factor Networks
Source: PLoS One. 2010 Feb 24;5(2):e9289. doi: 10.1371/journal.pone.0009289 (PMC2827538; doi:10.1371/journal.pone.0009289)
Supplement: Table S4 — List of interacting sequence tags (ISTs). The definition of ‘class’ is given in Figures S2 and S3 in the sections ‘IST analysis’ and ‘Definition of interacting regions (IR) and clusters’ in the Supporting Methods. Data on class 3 are available upon request (contact EM-S [nekoneko@educ.cc.keio.ac.jp]). (0.67 MB XLS) [file pone.0009289.s017.xls]

## Sheet: Table S4
Table S4 List of interacting sequence tags (ISTs)
Bait Entrez GeneID	Bait GeneSymbol	Bait GenBank Accession Number	Bait_start position (amino acid)	Bait_end position (amino acid)	IST Number	Prey Entrez GeneID	Prey GeneSymbol	Prey GenBank Accession Number	Prey_start position (amino acid)	Prey_end position (amino acid)	class	IR_number
1386	ATF2	NM_001880	1	505	IVV_S20051122_F07_04_B11	6744	SSFA2	NM_006751.3	374	408	class2	IR_175
1386	ATF2	NM_001880	1	505	IVV_S20051122_F07_04_H11	509	ATP5C1	NM_001001973.1	260	277	class2	IR_176
11016	ATF7	NM_006856	344	399	IVV_S20060609_5TH_E10_01_E04	8725	C19orf2	NM_003796.2	432	459	class1	IR_304
11016	ATF7	NM_006856	344	399	IVV_S20060609_5TH_E10_03_H11	8725	C19orf2	NM_003796.2	432	459	class1	IR_304
11016	ATF7	NM_006856	344	399	IVV_T060117_E10_A12	8725	C19orf2	NM_003796.2	432	459	class1	IR_304
11016	ATF7	NM_006856	344	399	IVV_T060117_E10_B22	8725	C19orf2	NM_003796.2	432	459	class1	IR_304
11016	ATF7	NM_006856	344	399	IVV_T060117_E10_E02	8725	C19orf2	NM_003796.2	432	459	class1	IR_304
11016	ATF7	NM_006856	344	399	IVV_T060117_E10_G11	8725	C19orf2	NM_003796.2	432	459	class1	IR_304
11016	ATF7	NM_006856	344	399	IVV_T060117_E10_H16	8725	C19orf2	NM_003796.2	432	459	class1	IR_304
11016	ATF7	NM_006856	344	399	IVV_T060117_E10_H20	8725	C19orf2	NM_003796.2	432	459	class1	IR_304
11016	ATF7	NM_006856	344	399	IVV_T060117_E10_I05	8725	C19orf2	NM_003796.2	432	459	class1	IR_304
11016	ATF7	NM_006856	344	399	IVV_T060117_E10_N10	8725	C19orf2	NM_003796.2	432	459	class1	IR_304
11016	ATF7	NM_006856	344	399	IVV_T060117_E10_O22	8725	C19orf2	NM_003796.2	432	459	class1	IR_304
11016	ATF7	NM_006856	344	399	IVV_T060117_E10_P20	8725	C19orf2	NM_003796.2	432	459	class1	IR_304
11016	ATF7	NM_006856	344	399	IVV_S20060609_5TH_E10_02_G04	54940	OCIAD1	NM_017830.1	180	217	class1	IR_305
11016	ATF7	NM_006856	344	399	IVV_T060117_E10_D02	54940	OCIAD1	NM_017830.1	178	217	class1	IR_305
11016	ATF7	NM_006856	344	399	IVV_T060117_E10_M09	54940	OCIAD1	NM_017830.1	178	217	class1	IR_305
11016	ATF7	NM_006856	344	399	IVV_S20060609_5TH_E10_03_B07	51347	TAOK3	NM_016281.2	354	373	class1	IR_306
11016	ATF7	NM_006856	344	399	IVV_S20060609_5TH_E10_03_E08	51347	TAOK3	NM_016281.2	354	373	class1	IR_306
11016	ATF7	NM_006856	344	399	IVV_T060117_E10_A20	51347	TAOK3	NM_016281.2	354	373	class1	IR_306
11016	ATF7	NM_006856	344	399	IVV_T060117_E10_B14	51347	TAOK3	NM_016281.2	356	373	class1	IR_306
11016	ATF7	NM_006856	344	399	IVV_T060117_E10_C21	51347	TAOK3	NM_016281.2	355	373	class1	IR_306
11016	ATF7	NM_006856	344	399	IVV_T060117_E10_H10	51347	TAOK3	NM_016281.2	357	373	class1	IR_306
11016	ATF7	NM_006856	344	399	IVV_T060117_E10_I15	51347	TAOK3	NM_016281.2	354	373	class1	IR_306
11016	ATF7	NM_006856	344	399	IVV_T060117_E10_I19	51347	TAOK3	NM_016281.2	357	373	class1	IR_306
11016	ATF7	NM_006856	344	399	IVV_T060117_E10_J08	51347	TAOK3	NM_016281.2	354	373	class1	IR_306
11016	ATF7	NM_006856	344	399	IVV_T060117_E10_P08	51347	TAOK3	NM_016281.2	354	373	class1	IR_306
11016	ATF7	NM_006856	344	399	IVV_T060117_E10_L02	129531	MITD1	NM_138798.1	181	195	class1	IR_836
11016	ATF7	NM_006856	344	399	IVV_T060117_E10_L13	129531	MITD1	NM_138798.1	181	195	class1	IR_836
11016	ATF7	NM_006856	344	399	IVV_T060117_E10_G17	43	ACHE	NM_015831.2	336	350	class2	IR_834
11016	ATF7	NM_006856	344	399	IVV_T060117_E10_J06	5921	RASA1	NM_002890.1	177	189	class2	IR_835
865	CBFB	BC018509	1	182	IVV_S20060609_7TH_F6_02_H06	5862	RAB2	NM_002865.1	116	133	class1	IR_533
865	CBFB	BC018509	1	182	IVV_S20060609_7TH_F6_04_F05	5862	RAB2	NM_002865.1	116	133	class1	IR_533
865	CBFB	BC018509	1	182	IVV_T060117_F6_C07	5862	RAB2	NM_002865.1	121	134	class1	IR_533
865	CBFB	BC018509	1	182	IVV_S20060609_5TH_F6_01_A09	170506	DHX36	NM_020865.1	424	466	class2	IR_340
865	CBFB	BC018509	1	182	IVV_S20060609_5TH_F6_01_C10	6857	SYT1	NM_005639.1	95	112	class2	IR_341
865	CBFB	BC018509	1	182	IVV_S20060609_5TH_F6_02_C06	57282	SLC4A10	NM_022058.2	77	87	class2	IR_342
865	CBFB	BC018509	1	182	IVV_S20060609_5TH_F6_02_C11	8404	SPARCL1	NM_004684.2	268	277	class2	IR_343
865	CBFB	BC018509	1	182	IVV_S20060609_5TH_F6_02_H08	5917	RARS	NM_002887.3	399	409	class2	IR_344
865	CBFB	BC018509	1	182	IVV_S20060609_5TH_F6_03_F01	8522	GAS7	NM_201433.1	232	244	class2	IR_345
865	CBFB	BC018509	1	182	IVV_S20060609_5TH_F6_04_E10	4133	MAP2	NM_002374.3	1055	1067	class2	IR_346
865	CBFB	BC018509	1	182	IVV_S20060609_7TH_F6_01_G10	5567	PRKACB	NM_002731.2	61	87	class2	IR_531
865	CBFB	BC018509	1	182	IVV_S20060609_7TH_F6_01_H06	10153	CEBPZ	NM_005760.2	821	838	class2	IR_532
865	CBFB	BC018509	1	182	IVV_S20060609_7TH_F6_03_D12	2923	PDIA3	NM_005313.4	493	503	class2	IR_534
865	CBFB	BC018509	1	182	IVV_S20060609_7TH_F6_03_H03	3725	JUN	NM_002228.3	275	327	class2	IR_535
865	CBFB	BC018509	1	182	IVV_T060117_F6_C21	351	APP	NM_000484.2	252	267	class2	IR_864
865	CBFB	BC018509	1	182	IVV_T060117_F6_H06	1294	COL7A1	NM_000094.2	1843	1859	class2	IR_865
865	CBFB	BC018509	1	182	IVV_T060117_F6_J04	667	DST	NM_183380.1	3655	3667	class2	IR_866
865	CBFB	BC018509	1	182	IVV_T060117_F6_K01	4133	MAP2	NM_002374.3	614	624	class2	IR_867
865	CBFB	BC018509	1	182	IVV_T060117_F6_M15	11224	RPL35	NM_007209.3	51	75	class2	IR_868
865	CBFB	BC018509	1	182	IVV_T060117_F6_P16	55726	C12orf11	NM_018164.1	570	608	class2	IR_869
25920	COBRA1	BC011892	1	475	IVV_T060117_E6_F16	10656	KHDRBS3	NM_006558.1	107	116	class1	IR_842
25920	COBRA1	BC011892	1	475	IVV_T060117_E6_F06	10656	KHDRBS3	NM_006558.1	107	116	class1	IR_842
25920	COBRA1	BC011892	1	475	IVV_T060117_E6_H18	10656	KHDRBS3	NM_006558.1	107	116	class1	IR_842
25920	COBRA1	BC011892	1	475	IVV_T060117_E6_J08	10656	KHDRBS3	NM_006558.1	107	116	class1	IR_842
25920	COBRA1	BC011892	1	475	IVV_S20060609_5TH_E6_01_G06	29993	PACSIN1	NM_020804.2	203	214	class2	IR_321
25920	COBRA1	BC011892	1	475	IVV_S20060609_5TH_E6_02_E10	8467	SMARCA5	NM_003601.2	1040	1051	class2	IR_322
25920	COBRA1	BC011892	1	475	IVV_T060117_E6_A17	140597	TCEAL2	NM_080390.3	173	183	class2	IR_841
25920	COBRA1	BC011892	1	475	IVV_T060117_E6_I08	4257	MGST1	NM_145791.1	57	71	class2	IR_843
25920	COBRA1	BC011892	1	475	IVV_T060117_E6_K04	3313	HSPA9	NM_004134.4	659	677	class2	IR_844
25920	COBRA1	BC011892	1	475	IVV_T060117_E6_L20	8562	DENR	NM_003677.3	75	90	class2	IR_845
1499	CTNNB1	NM_001904	1	781	IVV_S20051122_E03_02_E02	55119	PRPF38B	NM_018061.1	428	438	class2	IR_143
1499	CTNNB1	NM_001904	1	781	IVV_S20051122_E03_02_G12	56647	BCCIP	NM_078469.1	41	51	class2	IR_144
1499	CTNNB1	NM_001904	1	183	IVV_S20051122_F09_01_C02	9590	AKAP12	NM_005100.2	197	206	class2	IR_186
1499	CTNNB1	NM_001904	1	183	IVV_S20051122_F09_01_D04	27347	STK39	NM_013233.2	382	394	class2	IR_187
1499	CTNNB1	NM_001904	1	183	IVV_S20051122_F09_01_H01	51742	ARID4B	NM_016374.5	548	565	class2	IR_188
1499	CTNNB1	NM_001904	1	183	IVV_S20051122_F09_02_G05	9584	RBM39	NM_184234.1	511	522	class2	IR_189
1499	CTNNB1	NM_001904	1	183	IVV_S20051122_F09_02_H09	23112	TNRC6B	NM_015088.1	948	961	class2	IR_190
1499	CTNNB1	NM_001904	1	183	IVV_S20051122_F09_04_F03	57471	KIAA1189	NM_020711.1	184	211	class2	IR_191
1499	CTNNB1	NM_001904	1	781	IVV_S20060609_5TH_E3_01_E01	30011	SH3KBP1	NM_031892.1	198	207	class2	IR_307
1499	CTNNB1	NM_001904	1	781	IVV_S20060609_5TH_E3_01_E08	51260	CXorf26	NM_016500.3	194	209	class2	IR_308
1499	CTNNB1	NM_001904	1	781	IVV_S20060609_5TH_E3_03_F04	4036	LRP2	NM_004525.1	4505	4514	class2	IR_309
1499	CTNNB1	NM_001904	1	781	IVV_S20060609_5TH_E3_03_H03	22826	DNAJC8	NM_014280.2	168	189	class2	IR_310
1499	CTNNB1	NM_001904	1	183	IVV_S20060609_5TH_F9_02_C07	84162	KIAA1109	XM_371706.5	1200	1214	class2	IR_350
1499	CTNNB1	NM_001904	1	183	IVV_S20060609_5TH_F9_02_G12	6171	RPL41	NM_001035267.1	3	24	class2	IR_351
1499	CTNNB1	NM_001904	1	183	IVV_S20060609_5TH_F9_02_H10	6144	RPL21	NM_000982.3	106	117	class2	IR_352
1499	CTNNB1	NM_001904	1	183	IVV_S20060609_5TH_F9_03_H05	84162	KIAA1109	XM_371706.5	2190	2199	class2	IR_353
1499	CTNNB1	NM_001904	1	183	IVV_S20060609_5TH_F9_04_B09	8943	AP3D1	NM_003938.5	821	847	class2	IR_354
1499	CTNNB1	NM_001904	1	183	IVV_S20060609_5TH_F9_04_D08	55299	BXDC2	NM_018321.3	283	293	class2	IR_355
1499	CTNNB1	NM_001904	1	183	IVV_S20060609_7TH_F9_01_F09	1211	CLTA	NM_007096.2	111	149	class2	IR_536
1499	CTNNB1	NM_001904	1	183	IVV_S20060609_7TH_F9_03_A01	26060	APPL	NM_012096.1	243	253	class2	IR_537
1499	CTNNB1	NM_001904	1	183	IVV_S20060609_7TH_F9_03_E05	8125	ANP32A	NM_006305.2	214	233	class2	IR_538
1499	CTNNB1	NM_001904	1	183	IVV_S20060609_7TH_F9_04_B10	25909	AHCTF1	NM_015446.3	2171	2186	class2	IR_539
1499	CTNNB1	NM_001904	1	183	IVV_S20060609_7TH_F9_04_H07	84456	L3MBTL3	NM_032438.1	158	168	class2	IR_540
9191	DEDD	NM_032998	1	318	IVV_T060117_H2_G12	334	APLP2	NM_001642.1	212	221	class1	IR_390
9191	DEDD	NM_032998	1	318	IVV_S20060609_5TH_H2_02_D09	334	APLP2	NM_001642.1	210	222	class1	IR_390
9191	DEDD	NM_032998	1	318	IVV_S20060609_5TH_H2_01_A12	5274	SERPINI1	NM_005025.2	278	299	class2	IR_386
9191	DEDD	NM_032998	1	318	IVV_S20060609_5TH_H2_01_B02	529	ATP6V1E1	NM_001696.3	27	61	class2	IR_387
9191	DEDD	NM_032998	1	318	IVV_S20060609_5TH_H2_02_A10	84946	LTV1	NM_032860.3	440	454	class2	IR_388
9191	DEDD	NM_032998	1	318	IVV_S20060609_5TH_H2_02_C09	340543	TCEAL5	NM_001012979.1	26	43	class2	IR_389
9191	DEDD	NM_032998	1	318	IVV_S20060609_5TH_H2_02_E05	65117	FLJ11021	NM_198261.2	305	318	class2	IR_391
9191	DEDD	NM_032998	1	318	IVV_S20060609_5TH_H2_03_B06	5066	PAM	NM_000919.2	237	260	class2	IR_392
9191	DEDD	NM_032998	1	318	IVV_S20060609_5TH_H2_04_F03	7874	USP7	NM_003470.1	271	285	class2	IR_393
9191	DEDD	NM_032998	1	318	IVV_T060117_H2_C08	221960	C7orf28B	XM_001126212.1	117	127	class2	IR_909
9191	DEDD	NM_032998	1	318	IVV_T060117_H2_E24	10350	ABCA9	NM_080283.3	1329	1341	class2	IR_910
9191	DEDD	NM_032998	1	318	IVV_T060117_H2_H24	5926	ARID4A	NM_002892.3	633	661	class2	IR_911
1869	E2F1	NM_005225	380	437	IVV_S20051122_F10_04_F07	9399	STOML1	NM_004809.3	335	351	class1	IR_198
1869	E2F1	NM_005225	380	437	IVV_S20051122_F10_04_G03	9399	STOML1	NM_004809.3	335	351	class1	IR_198
1869	E2F1	NM_005225	380	437	IVV_S20051122_F10_01_D05	51742	ARID4B	NM_016374.5	265	283	class2	IR_192
1869	E2F1	NM_005225	380	437	IVV_S20051122_F10_01_H11	51035	LOC51035	NM_015853.3	125	137	class2	IR_193
1869	E2F1	NM_005225	380	437	IVV_S20051122_F10_02_B02	6772	STAT1	NM_007315.2	149	163	class2	IR_194
1869	E2F1	NM_005225	380	437	IVV_S20051122_F10_02_G11	9612	NCOR2	NM_006312.3	667	679	class2	IR_195
1869	E2F1	NM_005225	380	437	IVV_S20051122_F10_02_H02	10283	SDCCAG10	NM_005869.2	214	226	class2	IR_196
1869	E2F1	NM_005225	380	437	IVV_S20051122_F10_03_B04	7277	TUBA1	NM_006000.1	436	448	class2	IR_197
1869	E2F1	NM_005225	380	437	IVV_S20060609_5TH_F10_04_B11	728788	LOC728788	XM_001128485.1	147	168	class2	IR_328
1869	E2F1	NM_005225	380	437	IVV_S20060609_5TH_F10_04_C01	51335	NGRN	NM_016645.2	123	137	class2	IR_329
1869	E2F1	NM_005225	380	437	IVV_S20060609_5TH_F10_04_E12	10752	CHL1	NM_006614.2	1066	1082	class2	IR_330
1936	EEF1D	NM_001960	1	281	IVV_S20060609_7TH_G4_03_E11	4131	MAP1B	NM_005909.2	715	728	class1	IR_461
1936	EEF1D	NM_001960	124	162	IVV_S20060609_7TH_A10_01_E06	4131	MAP1B	NM_005909.2	680	738	class1	IR_461
1936	EEF1D	NM_001960	1	281	IVV_S20060609_7TH_G4_01_E12	4131	MAP1B	NM_005909.2	673	728	class1	IR_461
1936	EEF1D	NM_001960	124	162	IVV_T060117_A10_F03	4131	MAP1B	NM_005909.2	693	726	class1	IR_461
1936	EEF1D	NM_001960	124	162	IVV_S20060609_7TH_A10_03_F11	2058	EPRS	NM_004446.2	436	466	class1	IR_466
1936	EEF1D	NM_001960	124	162	IVV_S20060609_7TH_A10_03_F12	2058	EPRS	NM_004446.2	436	466	class1	IR_466
1936	EEF1D	NM_001960	124	162	IVV_S20060609_7TH_A10_01_G09	6647	SOD1	NM_000454.4	122	131	class2	IR_462
1936	EEF1D	NM_001960	124	162	IVV_S20060609_7TH_A10_02_A11	10533	ATG7	NM_006395.1	296	305	class2	IR_463
1936	EEF1D	NM_001960	124	162	IVV_S20060609_7TH_A10_02_G05	64434	NOM1	NM_138400.1	261	273	class2	IR_464
1936	EEF1D	NM_001960	124	162	IVV_S20060609_7TH_A10_03_D06	64376	IKZF5	NM_022466.3	68	77	class2	IR_465
1936	EEF1D	NM_001960	124	162	IVV_S20060609_7TH_A10_04_F04	5295	PIK3R1	NM_181523.1	506	516	class2	IR_467
1936	EEF1D	NM_001960	1	281	IVV_S20060609_7TH_G4_01_B11	9725	TMEM63A	NM_014698.1	262	278	class2	IR_553
1936	EEF1D	NM_001960	1	281	IVV_S20060609_7TH_G4_01_G02	7184	HSP90B1	NM_003299.1	681	695	class2	IR_554
1936	EEF1D	NM_001960	1	281	IVV_S20060609_7TH_G4_01_G03	65975	STK33	NM_030906.2	114	122	class2	IR_555
1936	EEF1D	NM_001960	1	281	IVV_S20060609_7TH_G4_02_A02	3836	KPNA1	NM_002264.2	21	41	class2	IR_556
1936	EEF1D	NM_001960	1	281	IVV_S20060609_7TH_G4_02_E01	64397	ZFP106	NM_022473.1	52	70	class2	IR_557
1936	EEF1D	NM_001960	1	281	IVV_S20060609_7TH_G4_04_E12	54487	DGCR8	NM_022720.5	356	365	class2	IR_558
1936	EEF1D	NM_001960	124	162	IVV_T051018_A10_A21	5700	PSMC1	NM_002802.2	293	323	class2	IR_621
1936	EEF1D	NM_001960	124	162	IVV_T051018_A10_D22	92104	TTC30A	NM_152275.2	517	529	class2	IR_622
1936	EEF1D	NM_001960	124	162	IVV_T051018_A10_G07	23271	CAMSAP1L1	NM_203459.1	1206	1215	class2	IR_623
1936	EEF1D	NM_001960	124	162	IVV_T051018_A10_L17	55749	CCAR1	NM_018237.2	799	816	class2	IR_624
1936	EEF1D	NM_001960	1	281	IVV_T051018_G4_C14	10598	AHSA1	NM_012111.1	63	76	class2	IR_736
1936	EEF1D	NM_001960	1	281	IVV_T051018_G4_F08	805	CALM2	NM_001743.3	122	134	class2	IR_737
1936	EEF1D	NM_001960	1	281	IVV_T051018_G4_H05	57584	ARHGAP21	NM_020824.2	1446	1456	class2	IR_738
1936	EEF1D	NM_001960	1	281	IVV_T051018_G4_I01	6418	SET	NM_003011.1	229	259	class2	IR_739
1936	EEF1D	NM_001960	1	281	IVV_T051018_G4_I05	5597	MAPK6	NM_002748.2	479	506	class2	IR_740
1936	EEF1D	NM_001960	1	281	IVV_T051018_G4_I11	56521	DNAJC12	NM_021800.2	119	149	class2	IR_741
1936	EEF1D	NM_001960	124	162	IVV_T060117_A10_C23	6144	RPL21	NM_000982.3	106	122	class2	IR_755
1936	EEF1D	NM_001960	124	162	IVV_T060117_A10_J17	79142	PHF23	NM_024297.2	238	256	class2	IR_756
1936	EEF1D	NM_001960	124	162	IVV_T060117_A10_O13	23253	ANKRD12	NM_015208.2	662	672	class2	IR_757
1936	EEF1D	NM_001960	1	281	IVV_T060117_G4_A02	1778	DYNC1H1	NM_001376.3	3776	3786	class2	IR_882
1936	EEF1D	NM_001960	1	281	IVV_T060117_G4_B16	6830	SUPT6H	NM_003170.3	60	69	class2	IR_883
1936	EEF1D	NM_001960	1	281	IVV_T060117_G4_D14	6294	SAFB	NM_002967.2	522	534	class2	IR_884
1936	EEF1D	NM_001960	1	281	IVV_T060117_G4_H14	27336	HTATSF1	NM_014500.3	661	687	class2	IR_885
1936	EEF1D	NM_001960	1	281	IVV_T060117_G4_H21	10574	CCT7	NM_006429.2	346	356	class2	IR_886
1936	EEF1D	NM_001960	1	281	IVV_T060117_G4_P10	8976	WASL	NM_003941.2	179	205	class2	IR_887
2113	ETS1	NM_005238	1	441	IVV_S20051122_E02_01_B12	334	APLP2	NM_001642.1	209	225	class1	IR_136
2113	ETS1	NM_005238	334	418	IVV_S20051122_E09_04_D07	334	APLP2	NM_001642.1	213	231	class1	IR_136
2113	ETS1	NM_005238	1	441	IVV_S20051122_E02_01_H05	23521	RPL13A	NM_012423.2	179	194	class1	IR_138
2113	ETS1	NM_005238	334	418	IVV_S20060609_7TH_E9_01_F09	23521	RPL13A	NM_012423.2	178	187	class1	IR_138
2113	ETS1	NM_005238	1	441	IVV_S20051122_E02_02_B03	3725	JUN	NM_002228.3	270	326	class1	IR_140
2113	ETS1	NM_005238	1	441	IVV_S20051122_E02_02_D09	3725	JUN	NM_002228.3	270	326	class1	IR_140
2113	ETS1	NM_005238	1	441	IVV_S20051122_E02_04_F09	3725	JUN	NM_002228.3	270	326	class1	IR_140
2113	ETS1	NM_005238	1	441	IVV_S20051122_E02_04_G01	3725	JUN	NM_002228.3	270	326	class1	IR_140
2113	ETS1	NM_005238	1	441	IVV_S20060609_7TH_E2_01_A08	3725	JUN	NM_002228.3	271	326	class1	IR_140
2113	ETS1	NM_005238	1	441	IVV_S20060609_7TH_E2_01_A11	3725	JUN	NM_002228.3	270	326	class1	IR_140
2113	ETS1	NM_005238	1	441	IVV_S20060609_7TH_E2_01_A12	3725	JUN	NM_002228.3	270	325	class1	IR_140
2113	ETS1	NM_005238	1	441	IVV_S20060609_7TH_E2_01_D01	3725	JUN	NM_002228.3	270	326	class1	IR_140
2113	ETS1	NM_005238	1	441	IVV_S20060609_7TH_E2_01_F01	3725	JUN	NM_002228.3	270	326	class1	IR_140
2113	ETS1	NM_005238	1	441	IVV_S20060609_7TH_E2_01_F05	3725	JUN	NM_002228.3	270	326	class1	IR_140
2113	ETS1	NM_005238	1	441	IVV_S20060609_7TH_E2_01_F10	3725	JUN	NM_002228.3	270	325	class1	IR_140
2113	ETS1	NM_005238	1	441	IVV_S20060609_7TH_E2_01_G06	3725	JUN	NM_002228.3	270	326	class1	IR_140
2113	ETS1	NM_005238	1	441	IVV_S20060609_7TH_E2_01_G07	3725	JUN	NM_002228.3	270	326	class1	IR_140
2113	ETS1	NM_005238	1	441	IVV_S20060609_7TH_E2_01_G08	3725	JUN	NM_002228.3	270	326	class1	IR_140
2113	ETS1	NM_005238	1	441	IVV_S20060609_7TH_E2_01_G12	3725	JUN	NM_002228.3	270	326	class1	IR_140
2113	ETS1	NM_005238	1	441	IVV_S20060609_7TH_E2_02_A01	3725	JUN	NM_002228.3	270	326	class1	IR_140
2113	ETS1	NM_005238	1	441	IVV_S20060609_7TH_E2_02_C02	3725	JUN	NM_002228.3	270	326	class1	IR_140
2113	ETS1	NM_005238	1	441	IVV_S20060609_7TH_E2_02_C03	3725	JUN	NM_002228.3	270	326	class1	IR_140
2113	ETS1	NM_005238	1	441	IVV_S20060609_7TH_E2_02_C08	3725	JUN	NM_002228.3	270	326	class1	IR_140
2113	ETS1	NM_005238	1	441	IVV_S20060609_7TH_E2_02_E06	3725	JUN	NM_002228.3	270	326	class1	IR_140
2113	ETS1	NM_005238	1	441	IVV_S20060609_7TH_E2_02_E07	3725	JUN	NM_002228.3	270	326	class1	IR_140
2113	ETS1	NM_005238	1	441	IVV_S20060609_7TH_E2_02_E09	3725	JUN	NM_002228.3	270	326	class1	IR_140
2113	ETS1	NM_005238	1	441	IVV_S20060609_7TH_E2_02_F05	3725	JUN	NM_002228.3	270	326	class1	IR_140
2113	ETS1	NM_005238	1	441	IVV_S20060609_7TH_E2_02_G05	3725	JUN	NM_002228.3	270	326	class1	IR_140
2113	ETS1	NM_005238	1	441	IVV_S20060609_7TH_E2_02_G09	3725	JUN	NM_002228.3	270	326	class1	IR_140
2113	ETS1	NM_005238	1	441	IVV_S20060609_7TH_E2_02_G10	3725	JUN	NM_002228.3	270	326	class1	IR_140
2113	ETS1	NM_005238	1	441	IVV_S20060609_7TH_E2_02_H03	3725	JUN	NM_002228.3	270	326	class1	IR_140
2113	ETS1	NM_005238	1	441	IVV_S20060609_7TH_E2_02_H06	3725	JUN	NM_002228.3	270	326	class1	IR_140
2113	ETS1	NM_005238	1	441	IVV_S20060609_7TH_E2_02_H12	3725	JUN	NM_002228.3	270	326	class1	IR_140
2113	ETS1	NM_005238	1	441	IVV_S20060609_7TH_E2_03_A07	3725	JUN	NM_002228.3	270	326	class1	IR_140
2113	ETS1	NM_005238	1	441	IVV_S20060609_7TH_E2_03_D10	3725	JUN	NM_002228.3	270	326	class1	IR_140
2113	ETS1	NM_005238	1	441	IVV_S20060609_7TH_E2_03_E04	3725	JUN	NM_002228.3	270	326	class1	IR_140
2113	ETS1	NM_005238	1	441	IVV_S20060609_7TH_E2_03_E07	3725	JUN	NM_002228.3	270	324	class1	IR_140
2113	ETS1	NM_005238	1	441	IVV_S20060609_7TH_E2_03_E11	3725	JUN	NM_002228.3	270	326	class1	IR_140
2113	ETS1	NM_005238	1	441	IVV_S20060609_7TH_E2_03_F04	3725	JUN	NM_002228.3	270	326	class1	IR_140
2113	ETS1	NM_005238	1	441	IVV_S20060609_7TH_E2_03_F11	3725	JUN	NM_002228.3	270	326	class1	IR_140
2113	ETS1	NM_005238	1	441	IVV_S20060609_7TH_E2_03_G05	3725	JUN	NM_002228.3	270	326	class1	IR_140
2113	ETS1	NM_005238	1	441	IVV_S20060609_7TH_E2_03_G08	3725	JUN	NM_002228.3	270	326	class1	IR_140
2113	ETS1	NM_005238	1	441	IVV_S20060609_7TH_E2_04_A07	3725	JUN	NM_002228.3	270	326	class1	IR_140
2113	ETS1	NM_005238	1	441	IVV_S20060609_7TH_E2_04_B11	3725	JUN	NM_002228.3	270	326	class1	IR_140
2113	ETS1	NM_005238	1	441	IVV_S20060609_7TH_E2_04_D06	3725	JUN	NM_002228.3	270	325	class1	IR_140
2113	ETS1	NM_005238	1	441	IVV_S20060609_7TH_E2_04_D07	3725	JUN	NM_002228.3	270	326	class1	IR_140
2113	ETS1	NM_005238	1	441	IVV_S20060609_7TH_E2_04_E04	3725	JUN	NM_002228.3	270	326	class1	IR_140
2113	ETS1	NM_005238	1	441	IVV_S20060609_7TH_E2_04_E12	3725	JUN	NM_002228.3	270	326	class1	IR_140
2113	ETS1	NM_005238	1	441	IVV_S20060609_7TH_E2_04_F04	3725	JUN	NM_002228.3	270	325	class1	IR_140
2113	ETS1	NM_005238	1	441	IVV_S20060609_7TH_E2_04_F06	3725	JUN	NM_002228.3	270	326	class1	IR_140
2113	ETS1	NM_005238	1	441	IVV_S20060609_7TH_E2_04_F09	3725	JUN	NM_002228.3	270	325	class1	IR_140
2113	ETS1	NM_005238	1	441	IVV_S20060609_7TH_E2_04_G12	3725	JUN	NM_002228.3	270	326	class1	IR_140
2113	ETS1	NM_005238	1	441	IVV_S20060609_7TH_E2_04_H06	3725	JUN	NM_002228.3	270	326	class1	IR_140
2113	ETS1	NM_005238	1	441	IVV_T060117_E2_B06	3725	JUN	NM_002228.3	271	326	class1	IR_140
2113	ETS1	NM_005238	1	441	IVV_T060117_E2_E17	3725	JUN	NM_002228.3	258	325	class1	IR_140
2113	ETS1	NM_005238	1	441	IVV_T060407_E02_A02	3725	JUN	NM_002228.3	270	326	class1	IR_140
2113	ETS1	NM_005238	1	441	IVV_T060407_E02_B04	3725	JUN	NM_002228.3	270	326	class1	IR_140
2113	ETS1	NM_005238	1	441	IVV_T060407_E02_B13	3725	JUN	NM_002228.3	270	326	class1	IR_140
2113	ETS1	NM_005238	1	441	IVV_T060407_E02_B15	3725	JUN	NM_002228.3	270	326	class1	IR_140
2113	ETS1	NM_005238	1	441	IVV_T060407_E02_C08	3725	JUN	NM_002228.3	270	326	class1	IR_140
2113	ETS1	NM_005238	1	441	IVV_T060407_E02_C24	3725	JUN	NM_002228.3	270	326	class1	IR_140
2113	ETS1	NM_005238	1	441	IVV_T060407_E02_D06	3725	JUN	NM_002228.3	270	326	class1	IR_140
2113	ETS1	NM_005238	1	441	IVV_T060407_E02_D09	3725	JUN	NM_002228.3	270	326	class1	IR_140
2113	ETS1	NM_005238	1	441	IVV_T060407_E02_D15	3725	JUN	NM_002228.3	270	326	class1	IR_140
2113	ETS1	NM_005238	1	441	IVV_T060407_E02_E08	3725	JUN	NM_002228.3	270	326	class1	IR_140
2113	ETS1	NM_005238	1	441	IVV_T060407_E02_F09	3725	JUN	NM_002228.3	270	326	class1	IR_140
2113	ETS1	NM_005238	1	441	IVV_T060407_E02_F16	3725	JUN	NM_002228.3	270	326	class1	IR_140
2113	ETS1	NM_005238	1	441	IVV_T060407_E02_G10	3725	JUN	NM_002228.3	270	326	class1	IR_140
2113	ETS1	NM_005238	1	441	IVV_T060407_E02_I01	3725	JUN	NM_002228.3	270	326	class1	IR_140
2113	ETS1	NM_005238	1	441	IVV_T060407_E02_J04	3725	JUN	NM_002228.3	270	325	class1	IR_140
2113	ETS1	NM_005238	1	441	IVV_T060407_E02_J14	3725	JUN	NM_002228.3	270	326	class1	IR_140
2113	ETS1	NM_005238	1	441	IVV_T060407_E02_J20	3725	JUN	NM_002228.3	270	326	class1	IR_140
2113	ETS1	NM_005238	1	441	IVV_T060407_E02_K02	3725	JUN	NM_002228.3	270	326	class1	IR_140
2113	ETS1	NM_005238	1	441	IVV_T060407_E02_K20	3725	JUN	NM_002228.3	270	326	class1	IR_140
2113	ETS1	NM_005238	1	441	IVV_T060407_E02_M03	3725	JUN	NM_002228.3	270	326	class1	IR_140
2113	ETS1	NM_005238	1	441	IVV_T060407_E02_M12	3725	JUN	NM_002228.3	270	326	class1	IR_140
2113	ETS1	NM_005238	1	441	IVV_T060407_E02_N18	3725	JUN	NM_002228.3	270	326	class1	IR_140
2113	ETS1	NM_005238	1	441	IVV_T060407_E02_P03	3725	JUN	NM_002228.3	270	326	class1	IR_140
2113	ETS1	NM_005238	1	441	IVV_T060407_E02_P04	3725	JUN	NM_002228.3	270	326	class1	IR_140
2113	ETS1	NM_005238	334	418	IVV_S20060609_7TH_E9_01_D09	9669	EIF5B	NM_015904.3	521	542	class1	IR_518
2113	ETS1	NM_005238	1	441	IVV_T051018_E2_M06	9669	EIF5B	NM_015904.3	511	542	class1	IR_518
2113	ETS1	NM_005238	334	418	IVV_T051018_E9_K15	51329	ARL6IP4	NM_001002252.1	216	229	class1	IR_724
2113	ETS1	NM_005238	1	441	IVV_T060407_E02_A18	51329	ARL6IP4	NM_001002252.1	208	220	class1	IR_724
2113	ETS1	NM_005238	1	441	IVV_T060407_E02_A20	51329	ARL6IP4	NM_001002252.1	208	220	class1	IR_724
2113	ETS1	NM_005238	1	441	IVV_T060117_E2_M07	4691	NCL	NM_005381.2	229	265	class1	IR_839
2113	ETS1	NM_005238	1	441	IVV_T060407_E02_I04	4691	NCL	NM_005381.2	236	251	class1	IR_839
2113	ETS1	NM_005238	1	441	IVV_S20051122_E02_01_B10	26135	SERBP1	NM_001018067.1	271	302	class2	IR_135
2113	ETS1	NM_005238	1	441	IVV_S20051122_E02_01_D11	9678	PHF14	NM_014660.2	798	861	class2	IR_137
2113	ETS1	NM_005238	1	441	IVV_S20051122_E02_02_A12	22990	PCNX	NM_014982.1	650	660	class2	IR_139
2113	ETS1	NM_005238	1	441	IVV_S20051122_E02_03_E12	9295	SFRS11	NM_004768.2	375	388	class2	IR_141
2113	ETS1	NM_005238	1	441	IVV_S20051122_E02_04_A04	2778	GNAS	NM_000516.4	10	25	class2	IR_142
2113	ETS1	NM_005238	334	418	IVV_S20051122_E09_01_H10	51663	ZFR	NM_016107.3	626	637	class2	IR_149
2113	ETS1	NM_005238	334	418	IVV_S20051122_E09_02_B02	27034	ACAD8	NM_014384.2	70	80	class2	IR_150
2113	ETS1	NM_005238	334	418	IVV_S20051122_E09_02_D08	79415	C17orf62	NM_001033046.1	49	65	class2	IR_151
2113	ETS1	NM_005238	334	418	IVV_S20051122_E09_02_F06	988	CDC5L	NM_001253.2	767	782	class2	IR_152
2113	ETS1	NM_005238	334	418	IVV_S20051122_E09_02_G11	55250	STATIP1	NM_018255.1	784	796	class2	IR_153
2113	ETS1	NM_005238	334	418	IVV_S20051122_E09_03_A01	6418	SET	NM_003011.1	241	258	class2	IR_154
2113	ETS1	NM_005238	334	418	IVV_S20051122_E09_03_G03	5204	PFDN5	NM_002624.3	72	98	class2	IR_155
2113	ETS1	NM_005238	334	418	IVV_S20051122_E09_04_A07	81887	LAS1L	NM_031206.2	584	602	class2	IR_156
2113	ETS1	NM_005238	334	418	IVV_S20051122_E09_04_E10	283820	NOMO2	NM_173614.2	561	572	class2	IR_157
2113	ETS1	NM_005238	334	418	IVV_S20051122_E09_04_E11	1595	CYP51A1	NM_000786.2	300	318	class2	IR_158
2113	ETS1	NM_005238	334	418	IVV_S20051122_E09_04_E12	29082	CHMP4A	NM_014169.2	196	210	class2	IR_159
2113	ETS1	NM_005238	334	418	IVV_S20051122_E09_04_H04	3146	HMGB1	NM_002128.4	190	199	class2	IR_160
2113	ETS1	NM_005238	1	441	IVV_S20060609_7TH_E2_01_E05	4741	NEFM	NM_005382.1	697	729	class2	IR_516
2113	ETS1	NM_005238	1	441	IVV_S20060609_7TH_E2_02_H11	54680	C1orf181	NM_017953.2	129	145	class2	IR_517
2113	ETS1	NM_005238	334	418	IVV_S20060609_7TH_E9_02_A03	9353	SLIT2	NM_004787.1	676	687	class2	IR_519
2113	ETS1	NM_005238	334	418	IVV_S20060609_7TH_E9_02_D09	51742	ARID4B	NM_016374.5	620	640	class2	IR_520
2113	ETS1	NM_005238	334	418	IVV_S20060609_7TH_E9_03_B08	51400	PPME1	NM_016147.1	257	280	class2	IR_521
2113	ETS1	NM_005238	334	418	IVV_S20060609_7TH_E9_04_D08	60592	SCOC	NM_032547.1	48	87	class2	IR_522
2113	ETS1	NM_005238	1	441	IVV_T051018_E2_A22	116966	WDR17	NM_170710.3	1202	1212	class2	IR_707
2113	ETS1	NM_005238	1	441	IVV_T051018_E2_B06	16	AARS	NM_001605.2	816	843	class2	IR_708
2113	ETS1	NM_005238	1	441	IVV_T051018_E2_E11	8661	EIF3S10	NM_003750.2	794	813	class2	IR_709
2113	ETS1	NM_005238	1	441	IVV_T051018_E2_I16	8664	EIF3S7	NM_003753.3	531	543	class2	IR_710
2113	ETS1	NM_005238	1	441	IVV_T051018_E2_J05	10814	CPLX2	NM_006650.3	73	82	class2	IR_711
2113	ETS1	NM_005238	1	441	IVV_T051018_E2_J07	1059	CENPB	NM_001810.5	497	513	class2	IR_712
2113	ETS1	NM_005238	1	441	IVV_T051018_E2_K20	148423	C1orf52	NM_198077.1	136	162	class2	IR_713
2113	ETS1	NM_005238	1	441	IVV_T051018_E2_O19	7248	TSC1	NM_000368.3	980	994	class2	IR_714
2113	ETS1	NM_005238	1	441	IVV_T051018_E2_P21	2058	EPRS	NM_004446.2	1198	1237	class2	IR_715
2113	ETS1	NM_005238	334	418	IVV_T051018_E9_A08	6595	SMARCA2	NM_003070.3	1346	1368	class2	IR_720
2113	ETS1	NM_005238	334	418	IVV_T051018_E9_B15	26750	RPS6KC1	NM_012424.2	746	765	class2	IR_721
2113	ETS1	NM_005238	334	418	IVV_T051018_E9_E15	334	APLP2	NM_001642.1	248	277	class2	IR_722
2113	ETS1	NM_005238	334	418	IVV_T051018_E9_J13	9900	SV2A	NM_014849.2	70	97	class2	IR_723
2113	ETS1	NM_005238	334	418	IVV_T051018_E9_O21	85012	TCEAL3	NM_001006933.1	134	151	class2	IR_725
2113	ETS1	NM_005238	1	441	IVV_T060117_E2_F12	221061	C10orf38	NM_001010924.1	859	870	class2	IR_837
2113	ETS1	NM_005238	1	441	IVV_T060117_E2_L15	153527	ZMAT2	NM_144723.1	149	170	class2	IR_838
2113	ETS1	NM_005238	1	441	IVV_T060117_E2_N23	7267	TTC3	NM_003316.3	760	776	class2	IR_840
2113	ETS1	NM_005238	1	441	IVV_T060407_E02_D24	3727	JUND	NM_005354.3	275	340	class2	IR_952
2113	ETS1	NM_005238	1	441	IVV_T060407_E02_E05	5887	RAD23B	NM_002874.3	309	320	class2	IR_953
2353	FOS	NM_005252	117	211	IVV_050517_5_D1_C05_5_D1C5_034	3725	JUN	NM_002228.3	284	327	class1	IR_12
2353	FOS	NM_005252	117	211	IVV_050517_5_D1_C09_5_D1C9_066	3725	JUN	NM_002228.3	284	327	class1	IR_12
2353	FOS	NM_005252	117	211	IVV_050517_5_D1_H05_5_D1H5_044	3725	JUN	NM_002228.3	257	326	class1	IR_12
2353	FOS	NM_005252	117	211	IVV_050519_m5_2_G09_m5_2_G9_068	3725	JUN	NM_002228.3	282	326	class1	IR_12
2353	FOS	NM_005252	117	211	IVV_S050511_D1_5TH_F12	3725	JUN	NM_002228.3	257	326	class1	IR_12
2353	FOS	NM_005252	117	211	IVV_S20051122_A12_01_B10	3725	JUN	NM_002228.3	270	315	class1	IR_12
2353	FOS	NM_005252	117	211	IVV_S20051122_A12_01_C02	3725	JUN	NM_002228.3	269	315	class1	IR_12
2353	FOS	NM_005252	117	211	IVV_S20051122_A12_02_F09	3725	JUN	NM_002228.3	270	315	class1	IR_12
2353	FOS	NM_005252	117	211	IVV_S20051122_A12_03_B07	3725	JUN	NM_002228.3	270	315	class1	IR_12
2353	FOS	NM_005252	117	211	IVV_S20051122_A12_03_B12	3725	JUN	NM_002228.3	270	315	class1	IR_12
2353	FOS	NM_005252	117	211	IVV_S20051122_A12_03_D06	3725	JUN	NM_002228.3	270	315	class1	IR_12
2353	FOS	NM_005252	117	211	IVV_S20051122_A12_03_E08	3725	JUN	NM_002228.3	270	315	class1	IR_12
2353	FOS	NM_005252	117	211	IVV_S20051122_A12_04_B03	3725	JUN	NM_002228.3	270	315	class1	IR_12
2353	FOS	NM_005252	117	211	IVV_S20060609_6TH_A12_01_D12	3725	JUN	NM_002228.3	270	315	class1	IR_12
2353	FOS	NM_005252	117	211	IVV_S20060609_6TH_A12_01_F05	3725	JUN	NM_002228.3	270	315	class1	IR_12
2353	FOS	NM_005252	117	211	IVV_S20060609_6TH_A12_01_G04	3725	JUN	NM_002228.3	270	315	class1	IR_12
2353	FOS	NM_005252	117	211	IVV_S20060609_6TH_A12_01_G08	3725	JUN	NM_002228.3	270	315	class1	IR_12
2353	FOS	NM_005252	117	211	IVV_S20060609_6TH_A12_02_D07	3725	JUN	NM_002228.3	270	325	class1	IR_12
2353	FOS	NM_005252	117	211	IVV_S20060609_6TH_A12_03_B07	3725	JUN	NM_002228.3	270	315	class1	IR_12
2353	FOS	NM_005252	117	211	IVV_S20060609_6TH_A12_03_F01	3725	JUN	NM_002228.3	270	315	class1	IR_12
2353	FOS	NM_005252	117	211	IVV_T050511_D01_A12	3725	JUN	NM_002228.3	257	326	class1	IR_12
2353	FOS	NM_005252	117	211	IVV_T050511_D01_D12	3725	JUN	NM_002228.3	284	327	class1	IR_12
2353	FOS	NM_005252	117	211	IVV_T060407_A12_B03	3725	JUN	NM_002228.3	270	315	class1	IR_12
2353	FOS	NM_005252	117	211	IVV_T060407_A12_E21	3725	JUN	NM_002228.3	270	315	class1	IR_12
2353	FOS	NM_005252	117	211	IVV_T060407_A12_E22	3725	JUN	NM_002228.3	270	315	class1	IR_12
2353	FOS	NM_005252	117	211	IVV_T060407_A12_F11	3725	JUN	NM_002228.3	270	315	class1	IR_12
2353	FOS	NM_005252	117	211	IVV_T060407_A12_F21	3725	JUN	NM_002228.3	270	315	class1	IR_12
2353	FOS	NM_005252	117	211	IVV_T060407_A12_G10	3725	JUN	NM_002228.3	270	315	class1	IR_12
2353	FOS	NM_005252	117	211	IVV_T060407_A12_G24	3725	JUN	NM_002228.3	270	315	class1	IR_12
2353	FOS	NM_005252	117	211	IVV_T060407_A12_H13	3725	JUN	NM_002228.3	270	315	class1	IR_12
2353	FOS	NM_005252	117	211	IVV_T060407_A12_H19	3725	JUN	NM_002228.3	270	315	class1	IR_12
2353	FOS	NM_005252	117	211	IVV_T060407_A12_I16	3725	JUN	NM_002228.3	270	315	class1	IR_12
2353	FOS	NM_005252	117	211	IVV_T060407_A12_K11	3725	JUN	NM_002228.3	270	315	class1	IR_12
2353	FOS	NM_005252	117	211	IVV_T060407_A12_K22	3725	JUN	NM_002228.3	270	315	class1	IR_12
2353	FOS	NM_005252	117	211	IVV_T060407_A12_M16	3725	JUN	NM_002228.3	270	315	class1	IR_12
2353	FOS	NM_005252	117	211	IVV_T060407_A12_N14	3725	JUN	NM_002228.3	270	315	class1	IR_12
2353	FOS	NM_005252	117	211	IVV_T060407_A12_P07	3725	JUN	NM_002228.3	270	315	class1	IR_12
2353	FOS	NM_005252	1	380	IVV_T060407_C01_I01	3725	JUN	NM_002228.3	259	322	class1	IR_12
2353	FOS	NM_005252	117	211	IVV_T060407_A12_I04	3725	JUN	NM_002228.3	270	315	class1	IR_12
2353	FOS	NM_005252	117	211	IVV_T060407_A12_I07	3725	JUN	NM_002228.3	270	315	class1	IR_12
2353	FOS	NM_005252	1	380	IVV_T060407_C01_F03	3725	JUN	NM_002228.3	284	322	class1	IR_12
2353	FOS	NM_005252	117	211	IVV_050517_5_D1_G09_5_D1G9_068	4131	MAP1B	NM_005909.2	671	719	class1	IR_13
2353	FOS	NM_005252	117	211	IVV_S050511_D1_5TH_B11	4131	MAP1B	NM_005909.2	654	718	class1	IR_13
2353	FOS	NM_005252	1	380	IVV_T050726_F12_H04	4131	MAP1B	NM_005909.2	684	730	class1	IR_13
2353	FOS	NM_005252	1	380	IVV_S20051122_C01_03_C05	9478	CABP1	NM_001033677.1	306	321	class1	IR_21
2353	FOS	NM_005252	117	211	IVV_S050511_B1_5TH_H03	9478	CABP1	NM_001033677.1	306	321	class1	IR_21
2353	FOS	NM_005252	117	211	IVV_T051018_A12_F09	9478	CABP1	NM_001033677.1	304	321	class1	IR_21
2353	FOS	NM_005252	1	380	IVV_T050726_F12_G04	351	APP	NM_000484.2	245	256	class1	IR_29
2353	FOS	NM_005252	117	211	IVV_S050511_G1_4TH_G02	351	APP	NM_000484.2	240	256	class1	IR_29
2353	FOS	NM_005252	1	380	IVV_S20060609_6TH_C1_02_H06	351	APP	NM_000484.2	238	266	class1	IR_29
2353	FOS	NM_005252	117	211	IVV_S050511_G1_3RD_E09	351	APP	NM_000484.2	238	266	class1	IR_29
2353	FOS	NM_005252	1	380	IVV_S20051122_C01_04_C10	351	APP	NM_000484.2	249	261	class1	IR_29
2353	FOS	NM_005252	1	380	IVV_S20051122_C01_01_F10	351	APP	NM_000484.2	232	255	class1	IR_29
2353	FOS	NM_005252	1	380	IVV_T050726_F12_N05	351	APP	NM_000484.2	238	264	class1	IR_29
2353	FOS	NM_005252	1	380	IVV_T060407_C01_A11	351	APP	NM_000484.2	237	260	class1	IR_29
2353	FOS	NM_005252	1	380	IVV_T060407_C01_H15	351	APP	NM_000484.2	222	259	class1	IR_29
2353	FOS	NM_005252	117	211	IVV_S050511_G1_3RD_F12	1191	CLU	NM_203339.1	61	76	class1	IR_30
2353	FOS	NM_005252	1	380	IVV_T050726_F12_L08	1191	CLU	NM_203339.1	47	63	class1	IR_30
2353	FOS	NM_005252	1	380	IVV_T060407_C01_C02	1191	CLU	NM_203339.1	52	65	class1	IR_30
2353	FOS	NM_005252	117	211	IVV_S050511_G1_4TH_D01	51329	ARL6IP4	NM_001002252.1	217	233	class1	IR_31
2353	FOS	NM_005252	1	380	IVV_S20051122_C01_02_E06	51329	ARL6IP4	NM_001002252.1	216	231	class1	IR_31
2353	FOS	NM_005252	1	380	IVV_T060407_C01_J02	51329	ARL6IP4	NM_001002252.1	217	231	class1	IR_31
2353	FOS	NM_005252	1	380	IVV_S20051122_C01_03_G12	130916	MTERFD2	NM_182501.2	342	369	class1	IR_4
2353	FOS	NM_005252	117	211	IVV_040806C-FosA10hi1_02	130916	MTERFD2	NM_182501.2	346	379	class1	IR_4,IR_5
2353	FOS	NM_005252	1	380	IVV_S20060609_6TH_C1_02_A10	3303	HSPA1A	NM_005345.4	583	597	class1	IR_437
2353	FOS	NM_005252	1	380	IVV_T050726_F12_K09	3303	HSPA1A	NM_005345.4	563	609	class1	IR_437
2353	FOS	NM_005252	1	380	IVV_T050726_F12_I09	130916	MTERFD2	NM_182501.2	369	380	class1	IR_5
2353	FOS	NM_005252	117	211	IVV_040806C-FosA5hi1_01	6418	SET	NM_003011.1	245	274	class1	IR_6
2353	FOS	NM_005252	1	380	IVV_S20060609_6TH_C1_04_B04	6418	SET	NM_003011.1	257	267	class1	IR_6
2353	FOS	NM_005252	1	380	IVV_T050726_F12_J21	6418	SET	NM_003011.1	259	276	class1	IR_6
2353	FOS	NM_005252	117	211	IVV_S20051122_A12_03_H01	3727	JUND	NM_005354.3	292	331	class1	IR_7
2353	FOS	NM_005252	117	211	IVV_040806C-FosC6hi1_06	3727	JUND	NM_005354.3	279	330	class1	IR_7
2353	FOS	NM_005252	117	211	IVV_040806C-FosH10hi1_16	3727	JUND	NM_005354.3	288	331	class1	IR_7
2353	FOS	NM_005252	117	211	IVV_050516_5th_G1_H07_5_G1H7_060	3727	JUND	NM_005354.3	286	331	class1	IR_7
2353	FOS	NM_005252	117	211	IVV_S20051122_A12_01_H05	3727	JUND	NM_005354.3	292	331	class1	IR_7
2353	FOS	NM_005252	117	211	IVV_S20051122_A12_04_G06	3727	JUND	NM_005354.3	292	331	class1	IR_7
2353	FOS	NM_005252	117	211	IVV_S20051122_A12_04_H11	3727	JUND	NM_005354.3	292	331	class1	IR_7
2353	FOS	NM_005252	117	211	IVV_T060407_A12_A15	3727	JUND	NM_005354.3	292	331	class1	IR_7
2353	FOS	NM_005252	1	380	IVV_T050726_F12_F24	1386	ATF2	NM_001880.2	371	424	class1	IR_8
2353	FOS	NM_005252	117	211	IVV_040806C-FosD3hi1_07	1386	ATF2	NM_001880.2	353	422	class1	IR_8
2353	FOS	NM_005252	1	380	IVV_S20051122_C01_01_A10	81611	ANP32E	NM_030920.2	237	253	class1	IR_83
2353	FOS	NM_005252	1	380	IVV_T060407_C01_J12	81611	ANP32E	NM_030920.2	243	257	class1	IR_83
2353	FOS	NM_005252	1	380	IVV_S20051122_C01_01_G01	4741	NEFM	NM_005382.1	719	732	class1	IR_84
2353	FOS	NM_005252	117	211	IVV_T050511_D01_D08	4741	NEFM	NM_005382.1	700	726	class1	IR_84
2353	FOS	NM_005252	1	380	IVV_S20051122_C01_03_E09	521	ATP5I	NM_007100.2	29	46	class1	IR_87
2353	FOS	NM_005252	1	380	IVV_S20060609_6TH_C1_03_A11	521	ATP5I	NM_007100.2	36	49	class1	IR_87
2353	FOS	NM_005252	1	380	IVV_T060407_C01_J10	521	ATP5I	NM_007100.2	38	48	class1	IR_87
2353	FOS	NM_005252	117	211	IVV_040806C-FosF12hi1_12	57282	SLC4A10	NM_022058.2	70	87	class2	IR_10
2353	FOS	NM_005252	117	211	IVV_050516_5th_G1_C05_5_G1C5_034	26135	SERBP1	NM_001018067.1	317	330	class2	IR_11
2353	FOS	NM_005252	117	211	IVV_E04_CSHB1-1-22C-FosE4hi1_10	4140	MARK3	NM_002376.4	50	64	class2	IR_18
2353	FOS	NM_005252	117	211	IVV_S050511_B1_5TH_D01	81887	LAS1L	NM_031206.2	197	212	class2	IR_20
2353	FOS	NM_005252	1	380	IVV_S050511_F12_5TH_C01	6218	RPS17	NM_001021.3	66	76	class2	IR_23
2353	FOS	NM_005252	1	380	IVV_S050511_F12_5TH_C08	6230	RPS25	NM_001028.2	24	41	class2	IR_24
2353	FOS	NM_005252	1	380	IVV_S050511_F12_5TH_G07	4659	PPP1R12A	NM_002480.1	806	848	class2	IR_25
2353	FOS	NM_005252	1	380	IVV_S050511_F12_5TH_H08	10905	MAN1A2	NM_006699.3	166	180	class2	IR_26
2353	FOS	NM_005252	117	211	IVV_S050511_G1_3RD_A08	26033	ATRNL1	NM_207303.2	219	239	class2	IR_27
2353	FOS	NM_005252	117	211	IVV_S050511_G1_3RD_D02	83660	TLN2	NM_015059.1	153	165	class2	IR_28
2353	FOS	NM_005252	117	211	IVV_S050511_G1_4TH_G04	81846	SBF2	NM_030962.2	1310	1326	class2	IR_32
2353	FOS	NM_005252	117	211	IVV_S050511_G1_4TH_G11	23270	TSPYL4	NM_021648.4	167	176	class2	IR_33
2353	FOS	NM_005252	117	211	IVV_S050511_G1_5TH_G05	84280	BTBD10	NM_032320.5	306	330	class2	IR_34
2353	FOS	NM_005252	117	211	IVV_S050511_H12_5TH_G01	6830	SUPT6H	NM_003170.3	24	67	class2	IR_39
2353	FOS	NM_005252	117	211	IVV_S050511_H12_5TH_H05	9204	ZMYM6	NM_007167.3	1057	1074	class2	IR_40
2353	FOS	NM_005252	1	380	IVV_S20060609_6TH_C1_02_A05	80829	ZFP91	NM_053023.2	208	222	class2	IR_436
2353	FOS	NM_005252	1	380	IVV_S20060609_6TH_C1_02_C07	29889	GNL2	NM_013285.1	704	720	class2	IR_438
2353	FOS	NM_005252	1	380	IVV_S20060609_6TH_C1_02_H04	22834	ZNF652	NM_014897.1	93	116	class2	IR_439
2353	FOS	NM_005252	1	380	IVV_T050511_F12_B05	6205	RPS11	NM_001015.3	73	84	class2	IR_570
2353	FOS	NM_005252	1	380	IVV_T050511_F12_B12	3423	IDS	NM_000202.3	166	191	class2	IR_571
2353	FOS	NM_005252	1	380	IVV_T050511_F12_D01	7184	HSP90B1	NM_003299.1	23	34	class2	IR_572
2353	FOS	NM_005252	117	211	IVV_T050511_G01_D12	51280	GOLPH2	NM_016548.2	318	347	class2	IR_573
2353	FOS	NM_005252	117	211	IVV_T050511_H12_A02	81608	FIP1L1	NM_030917.2	508	557	class2	IR_576
2353	FOS	NM_005252	117	211	IVV_T050511_H12_B03	7175	TPR	NM_003292.2	1940	1966	class2	IR_577
2353	FOS	NM_005252	117	211	IVV_T050511_H12_F03	9782	MATR3	NM_199189.1	627	677	class2	IR_578
2353	FOS	NM_005252	117	211	IVV_T050511_H12_H04	339965	FLJ25770	NM_001042784.1	593	621	class2	IR_579
2353	FOS	NM_005252	1	380	IVV_T050726_F12_B05	730382	LOC730382	XM_001133471.1	33	42	class2	IR_580
2353	FOS	NM_005252	1	380	IVV_T050726_F12_B15	9130	FAM50A	NM_004699.1	171	192	class2	IR_581
2353	FOS	NM_005252	1	380	IVV_T050726_F12_C04	347733	TUBB2B	NM_178012.3	427	439	class2	IR_582
2353	FOS	NM_005252	1	380	IVV_T050726_F12_D16	55379	LRRC59	NM_018509.2	179	220	class2	IR_583
2353	FOS	NM_005252	1	380	IVV_T050726_F12_F01	90441	ZNF622	NM_033414.2	199	222	class2	IR_584
2353	FOS	NM_005252	1	380	IVV_T050726_F12_M13	27101	CACYBP	NM_014412.2	161	174	class2	IR_585
2353	FOS	NM_005252	117	211	IVV_S20051122_A12_01_D01	7692	ZNF133	NM_003434.3	596	622	class2	IR_60
2353	FOS	NM_005252	117	211	IVV_T051018_A12_G01	280	AMY2B	NM_020978.3	270	296	class2	IR_625
2353	FOS	NM_005252	117	211	IVV_T051018_A12_J04	51575	ESF1	NM_016649.3	258	270	class2	IR_626
2353	FOS	NM_005252	117	211	IVV_T051018_A12_L17	51138	COPS4	NM_016129.2	323	336	class2	IR_627
2353	FOS	NM_005252	117	211	IVV_T051018_A12_O17	5495	PPM1B	NM_002706.4	402	412	class2	IR_628
2353	FOS	NM_005252	1	380	IVV_T051018_C1_B03	9168	TMSB10	NM_021103.3	3	39	class2	IR_661
2353	FOS	NM_005252	1	380	IVV_T051018_C1_B20	23223	RRP12	NM_015179.2	1160	1177	class2	IR_662
2353	FOS	NM_005252	1	380	IVV_S20051122_C01_02_A11	6000	RGS7	NM_002924.2	173	188	class2	IR_85
2353	FOS	NM_005252	1	380	IVV_S20051122_C01_02_G02	10600	USP16	NM_001032410.1	391	417	class2	IR_86
2353	FOS	NM_005252	1	380	IVV_S20051122_C01_03_G09	9360	PPIG	NM_004792.2	242	256	class2	IR_88
2353	FOS	NM_005252	1	380	IVV_S20051122_C01_04_D01	10180	RBM6	NM_005777.1	987	1005	class2	IR_89
2353	FOS	NM_005252	117	211	IVV_040806C-FosD6hi1_08	3726	JUNB	NM_002229.2	280	330	class2	IR_9
2353	FOS	NM_005252	1	380	IVV_S20051122_C01_04_D06	7529	YWHAB	NM_003404.3	69	87	class2	IR_90
2353	FOS	NM_005252	1	380	IVV_S20051122_C01_04_F07	114049	WBSCR22	NM_017528.2	242	257	class2	IR_91
2353	FOS	NM_005252	1	380	IVV_T060407_C01_A08	23271	CAMSAP1L1	NM_203459.1	1365	1380	class2	IR_919
2353	FOS	NM_005252	1	380	IVV_T060407_C01_A12	10946	SF3A3	NM_006802.2	357	366	class2	IR_920
2353	FOS	NM_005252	1	380	IVV_T060407_C01_B05	5318	PKP2	NM_004572.2	649	667	class2	IR_921
2353	FOS	NM_005252	1	380	IVV_T060407_C01_B14	63876	PKNOX2	NM_022062.2	442	456	class2	IR_922
2353	FOS	NM_005252	1	380	IVV_T060407_C01_E05	57634	EP400	NM_015409.3	910	921	class2	IR_923
2353	FOS	NM_005252	1	380	IVV_T060407_C01_E09	51652	VPS24	NM_016079.2	19	40	class2	IR_924
2353	FOS	NM_005252	1	380	IVV_T060407_C01_G23	5411	PNN	NM_002687.2	314	322	class2	IR_925
2353	FOS	NM_005252	1	380	IVV_T060407_C01_H06	333	APLP1	NM_001024807.1	537	551	class2	IR_926
2353	FOS	NM_005252	1	380	IVV_T060407_C01_H18	9284	NPIP	NM_006985.1	158	169	class2	IR_927
2353	FOS	NM_005252	1	380	IVV_T060407_C01_I14	9372	ZFYVE9	NM_004799.2	385	399	class2	IR_928
2353	FOS	NM_005252	1	380	IVV_T060407_C01_J13	23287	AGTPBP1	NM_015239.1	439	449	class2	IR_929
2353	FOS	NM_005252	1	380	IVV_T060407_C01_M01	9612	NCOR2	NM_006312.3	514	560	class2	IR_930
2353	FOS	NM_005252	1	380	IVV_T060407_C01_N23	4691	NCL	NM_005381.2	256	270	class2	IR_931
2963	GTF2F2	NM_004128	1	249	IVV_S20060609_7TH_G1_03_E01	6157	RPL27A	NM_000990.3	124	142	class1	IR_544
2963	GTF2F2	NM_004128	1	249	IVV_S20060609_7TH_G1_02_A02	6157	RPL27A	NM_000990.3	132	142	class1	IR_544
2963	GTF2F2	NM_004128	1	249	IVV_S20060609_5TH_G1_01_B04	351	APP	NM_000484.2	252	266	class2	IR_356
2963	GTF2F2	NM_004128	1	249	IVV_S20060609_5TH_G1_02_D02	1345	COX6C	NM_004374.2	44	66	class2	IR_357
2963	GTF2F2	NM_004128	1	249	IVV_S20060609_5TH_G1_03_E03	7993	UBXD6	NM_005671.2	81	94	class2	IR_358
2963	GTF2F2	NM_004128	1	249	IVV_S20060609_5TH_G1_03_G11	7018	TF	NM_001063.2	379	391	class2	IR_359
2963	GTF2F2	NM_004128	1	249	IVV_S20060609_5TH_G1_04_B03	11329	STK38	NM_007271.2	39	53	class2	IR_360
2963	GTF2F2	NM_004128	1	249	IVV_S20060609_5TH_G1_04_G09	5306	PITPNA	NM_006224.2	238	250	class2	IR_361
2963	GTF2F2	NM_004128	1	249	IVV_S20060609_5TH_G1_04_H05	10451	VAV3	NM_006113.3	166	178	class2	IR_362
2963	GTF2F2	NM_004128	1	249	IVV_S20060609_7TH_G1_01_A07	476	ATP1A1	NM_000701.6	27	36	class2	IR_541
2963	GTF2F2	NM_004128	1	249	IVV_S20060609_7TH_G1_01_E05	8725	C19orf2	NM_003796.2	291	310	class2	IR_542
2963	GTF2F2	NM_004128	1	249	IVV_S20060609_7TH_G1_01_F04	51185	CRBN	NM_016302.2	25	35	class2	IR_543
2963	GTF2F2	NM_004128	1	249	IVV_S20060609_7TH_G1_02_B09	4673	NAP1L1	NM_139207.1	346	358	class2	IR_545
2963	GTF2F2	NM_004128	1	249	IVV_S20060609_7TH_G1_02_G10	22883	CLSTN1	NM_001009566.1	214	223	class2	IR_546
2963	GTF2F2	NM_004128	1	249	IVV_S20060609_7TH_G1_03_B01	10526	IPO8	NM_006390.2	922	933	class2	IR_547
2963	GTF2F2	NM_004128	1	249	IVV_S20060609_7TH_G1_03_B09	2181	ACSL3	NM_004457.3	311	320	class2	IR_548
2963	GTF2F2	NM_004128	1	249	IVV_S20060609_7TH_G1_03_H06	27332	ZNF638	NM_014497.3	1954	1970	class2	IR_549
2963	GTF2F2	NM_004128	1	249	IVV_S20060609_7TH_G1_04_C08	23272	C3orf63	NM_015224.1	296	314	class2	IR_550
2963	GTF2F2	NM_004128	1	249	IVV_S20060609_7TH_G1_04_D04	165918	RNF168	NM_152617.2	152	178	class2	IR_551
2963	GTF2F2	NM_004128	1	249	IVV_S20060609_7TH_G1_04_G01	64422	ATG3	NM_022488.3	99	117	class2	IR_552
2963	GTF2F2	NM_004128	1	249	IVV_T060117_G1_E21	10905	MAN1A2	NM_006699.3	419	448	class2	IR_870
2963	GTF2F2	NM_004128	1	249	IVV_T060117_G1_J12	255758	MGC33212	NM_152773.2	87	99	class2	IR_871
2963	GTF2F2	NM_004128	1	249	IVV_T060117_G1_K20	5202	PFDN2	NM_012394.3	33	54	class2	IR_872
2963	GTF2F2	NM_004128	1	249	IVV_T060117_G1_M03	51575	ESF1	NM_016649.3	257	286	class2	IR_873
2963	GTF2F2	NM_004128	1	249	IVV_T060117_G1_N04	8697	CDC23	NM_004661.3	128	139	class2	IR_874
57801	HES4	BC012351	1	221	IVV_S20051122_E05_01_B02	26046	ZNF294	NM_015565.1	198	217	class1	IR_145
57801	HES4	BC012351	1	221	IVV_S20051122_E05_01_B06	26046	ZNF294	NM_015565.1	198	215	class1	IR_145
57801	HES4	BC012351	1	221	IVV_S20051122_E05_01_B09	26046	ZNF294	NM_015565.1	198	217	class1	IR_145
57801	HES4	BC012351	1	221	IVV_S20051122_E05_01_B12	26046	ZNF294	NM_015565.1	198	217	class1	IR_145
57801	HES4	BC012351	1	221	IVV_S20051122_E05_01_C05	26046	ZNF294	NM_015565.1	198	217	class1	IR_145
57801	HES4	BC012351	1	221	IVV_S20051122_E05_01_D07	26046	ZNF294	NM_015565.1	198	217	class1	IR_145
57801	HES4	BC012351	1	221	IVV_S20051122_E05_01_E07	26046	ZNF294	NM_015565.1	198	217	class1	IR_145
57801	HES4	BC012351	1	221	IVV_S20051122_E05_01_F09	26046	ZNF294	NM_015565.1	198	217	class1	IR_145
57801	HES4	BC012351	1	221	IVV_S20051122_E05_01_G10	26046	ZNF294	NM_015565.1	198	217	class1	IR_145
57801	HES4	BC012351	1	221	IVV_S20051122_E05_02_A03	26046	ZNF294	NM_015565.1	198	217	class1	IR_145
57801	HES4	BC012351	1	221	IVV_S20051122_E05_02_B01	26046	ZNF294	NM_015565.1	198	217	class1	IR_145
57801	HES4	BC012351	1	221	IVV_S20051122_E05_02_C06	26046	ZNF294	NM_015565.1	198	216	class1	IR_145
57801	HES4	BC012351	1	221	IVV_S20051122_E05_02_C10	26046	ZNF294	NM_015565.1	198	215	class1	IR_145
57801	HES4	BC012351	1	221	IVV_S20051122_E05_02_C11	26046	ZNF294	NM_015565.1	198	217	class1	IR_145
57801	HES4	BC012351	1	221	IVV_S20051122_E05_02_G04	26046	ZNF294	NM_015565.1	198	217	class1	IR_145
57801	HES4	BC012351	1	221	IVV_S20051122_E05_03_A04	26046	ZNF294	NM_015565.1	198	217	class1	IR_145
57801	HES4	BC012351	1	221	IVV_S20051122_E05_03_C04	26046	ZNF294	NM_015565.1	198	217	class1	IR_145
57801	HES4	BC012351	1	221	IVV_S20051122_E05_03_D02	26046	ZNF294	NM_015565.1	198	217	class1	IR_145
57801	HES4	BC012351	1	221	IVV_S20051122_E05_03_H08	26046	ZNF294	NM_015565.1	198	217	class1	IR_145
57801	HES4	BC012351	1	221	IVV_S20051122_E05_04_B05	26046	ZNF294	NM_015565.1	198	217	class1	IR_145
57801	HES4	BC012351	1	221	IVV_S20051122_E05_04_B08	26046	ZNF294	NM_015565.1	198	217	class1	IR_145
57801	HES4	BC012351	1	221	IVV_S20051122_E05_04_B11	26046	ZNF294	NM_015565.1	198	217	class1	IR_145
57801	HES4	BC012351	1	221	IVV_S20051122_E05_04_B12	26046	ZNF294	NM_015565.1	198	217	class1	IR_145
57801	HES4	BC012351	1	221	IVV_S20051122_E05_04_D04	26046	ZNF294	NM_015565.1	198	217	class1	IR_145
57801	HES4	BC012351	1	221	IVV_S20051122_E05_04_D06	26046	ZNF294	NM_015565.1	198	217	class1	IR_145
57801	HES4	BC012351	1	221	IVV_S20051122_E05_04_D10	26046	ZNF294	NM_015565.1	198	217	class1	IR_145
57801	HES4	BC012351	1	221	IVV_S20051122_E05_04_F01	26046	ZNF294	NM_015565.1	198	217	class1	IR_145
57801	HES4	BC012351	1	221	IVV_S20051122_E05_04_G05	26046	ZNF294	NM_015565.1	198	217	class1	IR_145
57801	HES4	BC012351	1	221	IVV_S20060609_5TH_E5_01_E01	26046	ZNF294	NM_015565.1	198	217	class1	IR_145
57801	HES4	BC012351	1	221	IVV_S20060609_5TH_E5_01_G03	26046	ZNF294	NM_015565.1	198	217	class1	IR_145
57801	HES4	BC012351	1	221	IVV_S20060609_5TH_E5_01_G07	26046	ZNF294	NM_015565.1	198	217	class1	IR_145
57801	HES4	BC012351	1	221	IVV_S20060609_5TH_E5_01_H10	26046	ZNF294	NM_015565.1	198	217	class1	IR_145
57801	HES4	BC012351	1	221	IVV_S20060609_5TH_E5_02_C06	26046	ZNF294	NM_015565.1	198	217	class1	IR_145
57801	HES4	BC012351	1	221	IVV_S20060609_5TH_E5_02_D05	26046	ZNF294	NM_015565.1	198	217	class1	IR_145
57801	HES4	BC012351	1	221	IVV_S20060609_5TH_E5_03_A09	26046	ZNF294	NM_015565.1	198	217	class1	IR_145
57801	HES4	BC012351	1	221	IVV_S20060609_5TH_E5_03_B11	26046	ZNF294	NM_015565.1	198	217	class1	IR_145
57801	HES4	BC012351	1	221	IVV_S20060609_5TH_E5_03_G12	26046	ZNF294	NM_015565.1	198	216	class1	IR_145
57801	HES4	BC012351	1	221	IVV_S20060609_5TH_E5_04_F04	26046	ZNF294	NM_015565.1	198	217	class1	IR_145
57801	HES4	BC012351	1	221	IVV_S20060609_5TH_E5_04_F08	26046	ZNF294	NM_015565.1	198	217	class1	IR_145
57801	HES4	BC012351	1	221	IVV_S20060609_5TH_E5_04_G07	26046	ZNF294	NM_015565.1	198	217	class1	IR_145
57801	HES4	BC012351	1	221	IVV_S20051122_E05_01_D10	5998	RGS3	NM_144488.4	1118	1144	class1	IR_146
57801	HES4	BC012351	1	221	IVV_S20051122_E05_04_A01	5998	RGS3	NM_144488.4	1119	1144	class1	IR_146
57801	HES4	BC012351	1	221	IVV_S20060609_5TH_E5_02_B12	26958	COPG2	NM_012133.3	88	115	class1	IR_317
57801	HES4	BC012351	1	221	IVV_S20060609_5TH_E5_03_E10	26958	COPG2	NM_012133.3	88	115	class1	IR_317
57801	HES4	BC012351	1	221	IVV_S20051122_E05_03_D10	3326	HSP90AB1	NM_007355.2	544	554	class2	IR_147
57801	HES4	BC012351	1	221	IVV_S20051122_E05_04_D08	23091	ZC3H13	NM_015070.3	1345	1357	class2	IR_148
57801	HES4	BC012351	1	221	IVV_S20060609_5TH_E5_01_B03	84319	C3orf26	NM_032359.2	74	94	class2	IR_315
57801	HES4	BC012351	1	221	IVV_S20060609_5TH_E5_01_E07	84125	LRRIQ1	NM_032165.2	372	388	class2	IR_316
57801	HES4	BC012351	1	221	IVV_S20060609_5TH_E5_02_C04	3800	KIF5C	NM_004522.1	752	777	class2	IR_318
57801	HES4	BC012351	1	221	IVV_S20060609_5TH_E5_04_B09	84239	ATP13A4	NM_032279.2	1137	1156	class2	IR_319
57801	HES4	BC012351	1	221	IVV_S20060609_5TH_E5_04_E06	1933	EEF1B2	NM_001037663.1	83	111	class2	IR_320
3725	JUN	NM_002228	168	319	IVV_C09_CSHB10-2-22C-JunC9hi1_05	351	APP	NM_000484.2	240	265	class1	IR_14,IR_15
3725	JUN	NM_002228	168	319	IVV_T050726_MJun4_2_D17	351	APP	NM_000484.2	244	253	class1	IR_14,IR_15
3725	JUN	NM_002228	168	319	IVV_T050726_MJun4_2_P08	351	APP	NM_000484.2	251	260	class1	IR_15
3725	JUN	NM_002228	168	319	IVV_S20060609_5TH_M4_2_01_B03	22924	MAPRE3	NM_012326.2	200	277	class1	IR_16
3725	JUN	NM_002228	168	319	IVV_D02_CSHB10-2-22C-JunD2hi1_08	22924	MAPRE3	NM_012326.2	184	278	class1	IR_16
3725	JUN	NM_002228	168	319	IVV_T050726_MJun4_2_C07	2353	FOS	NM_005252.2	155	233	class1	IR_17
3725	JUN	NM_002228	168	319	IVV_D12_CSHB10-2-22C-JunD12hi1_08	2353	FOS	NM_005252.2	149	266	class1	IR_17
3725	JUN	NM_002228	168	319	IVV_H03_CSHB10-2-22C-JunH3hi1_15	351	APP	NM_000484.2	205	238	class1	IR_19
3725	JUN	NM_002228	168	319	IVV_S20060609_5TH_M4_2_04_D10	351	APP	NM_000484.2	214	241	class1	IR_19
3725	JUN	NM_002228	168	319	IVV_S20060609_5TH_M4_2_02_H12	351	APP	NM_000484.2	232	252	class1	IR_19,IR_14
3725	JUN	NM_002228	168	319	IVV_T050726_MJun4_2_I18	351	APP	NM_000484.2	211	256	class1	IR_19,IR_14,IR_15
3725	JUN	NM_002228	168	319	IVV_T050726_MJun4_2_B07	3312	HSPA8	NM_006597.3	590	601	class1	IR_610
3725	JUN	NM_002228	168	319	IVV_T050726_MJun4_2_F01	3312	HSPA8	NM_006597.3	590	601	class1	IR_610
3725	JUN	NM_002228	168	319	IVV_T050726_MJun4_2_A14	3312	HSPA8	NM_006597.3	549	597	class1	IR_610
3725	JUN	NM_002228	168	319	IVV_T050726_MJun4_2_G19	1386	ATF2	NM_001880.2	359	422	class1	IR_612
3725	JUN	NM_002228	168	319	IVV_T050726_MJun4_2_C12	1386	ATF2	NM_001880.2	358	422	class1	IR_612
3725	JUN	NM_002228	168	319	IVV_T050726_MJun4_2_D03	1386	ATF2	NM_001880.2	353	422	class1	IR_612
3725	JUN	NM_002228	168	319	IVV_T050726_MJun4_2_E08	1386	ATF2	NM_001880.2	358	422	class1	IR_612
3725	JUN	NM_002228	168	319	IVV_T050726_MJun4_2_K08	1386	ATF2	NM_001880.2	353	422	class1	IR_612
3725	JUN	NM_002228	168	319	IVV_T050726_MJun4_2_J07	3320	HSP90AA1	NM_001017963.1	384	398	class1	IR_615
3725	JUN	NM_002228	168	319	IVV_T050726_MJun4_2_O04	3320	HSP90AA1	NM_001017963.1	391	400	class1	IR_615
3725	JUN	NM_002228	168	319	IVV_T050726_MJun4_2_J24	10488	CREB3	NM_006368.4	168	215	class1	IR_616
3725	JUN	NM_002228	168	319	IVV_T050726_MJun4_2_M24	10488	CREB3	NM_006368.4	168	215	class1	IR_616
3725	JUN	NM_002228	168	319	IVV_T050726_MJun4_2_K02	57120	GOPC	NM_020399.2	175	230	class1	IR_617
3725	JUN	NM_002228	168	319	IVV_T050726_MJun4_2_M19	57120	GOPC	NM_020399.2	175	230	class1	IR_617
3725	JUN	NM_002228	168	319	IVV_T051018_B12_J11	334	APLP2	NM_001642.1	271	292	class1	IR_634
3725	JUN	NM_002228	1	331	IVV_T060407_D01_A05	334	APLP2	NM_001642.1	270	280	class1	IR_634
3725	JUN	NM_002228	168	319	IVV_S20060609_5TH_M4_2_01_D10	203068	TUBB	NM_178014.2	401	412	class2	IR_408
3725	JUN	NM_002228	168	319	IVV_S20060609_5TH_M4_2_02_C01	9498	SLC4A8	NM_001039960.1	128	151	class2	IR_409
3725	JUN	NM_002228	168	319	IVV_S20060609_5TH_M4_2_02_E05	441454	LOC441454	XM_001127088.1	68	79	class2	IR_410
3725	JUN	NM_002228	168	319	IVV_S20060609_5TH_M4_2_03_C09	2571	GAD1	NM_000817.2	237	252	class2	IR_411
3725	JUN	NM_002228	168	319	IVV_S20060609_5TH_M4_2_03_G11	7916	BAT2	NM_080686.1	341	356	class2	IR_412
3725	JUN	NM_002228	168	319	IVV_S20060609_5TH_M4_2_04_E09	8925	HERC1	NM_003922.2	480	491	class2	IR_413
3725	JUN	NM_002228	168	319	IVV_S20060609_5TH_M4_2_04_G08	4741	NEFM	NM_005382.1	550	559	class2	IR_414
3725	JUN	NM_002228	168	319	IVV_T050726_MJun4_2_A08	7846	TUBA3	NM_006009.2	405	433	class2	IR_609
3725	JUN	NM_002228	168	319	IVV_T050726_MJun4_2_B20	2050	EPHB4	NM_004444.4	804	823	class2	IR_611
3725	JUN	NM_002228	168	319	IVV_T050726_MJun4_2_C22	55212	BBS7	NM_176824.1	240	267	class2	IR_613
3725	JUN	NM_002228	168	319	IVV_T050726_MJun4_2_H03	29911	HOOK2	NM_013312.1	610	682	class2	IR_614
3725	JUN	NM_002228	168	319	IVV_T050726_MJun4_2_K20	334	APLP2	NM_001642.1	215	230	class2	IR_618
3725	JUN	NM_002228	168	319	IVV_T050726_MJun4_2_L10	29888	STRN4	NM_001039877.1	81	145	class2	IR_619
3725	JUN	NM_002228	168	319	IVV_T050726_MJun4_2_P01	8239	USP9X	NM_001039590.1	1896	1914	class2	IR_620
3725	JUN	NM_002228	1	331	IVV_T060117_D1_C24	10752	CHL1	NM_006614.2	1105	1121	class2	IR_802
3726	JUNB	NM_002229	281	330	IVV_S20060609_5TH_C9_01_B07	5569	PKIA	NM_006823.2	54	69	class1	IR_255
3726	JUNB	NM_002229	281	330	IVV_S20060609_5TH_C9_03_F11	5569	PKIA	NM_006823.2	53	67	class1	IR_255
3726	JUNB	NM_002229	281	330	IVV_S20060609_5TH_C9_03_B02	374920	LOC374920	NM_199341.2	535	548	class1	IR_256
3726	JUNB	NM_002229	281	330	IVV_S20060609_5TH_C9_01_E07	374920	LOC374920	NM_199341.2	535	548	class1	IR_256
3726	JUNB	NM_002229	281	330	IVV_S20060609_5TH_C9_02_B08	374920	LOC374920	NM_199341.2	536	544	class1	IR_256
3726	JUNB	NM_002229	281	330	IVV_S20060609_5TH_C9_03_B03	374920	LOC374920	NM_199341.2	535	546	class1	IR_256
3726	JUNB	NM_002229	281	330	IVV_S20060609_5TH_C9_04_G04	374920	LOC374920	NM_199341.2	536	544	class1	IR_256
3726	JUNB	NM_002229	281	330	IVV_T060117_C9_H24	374920	LOC374920	NM_199341.2	536	544	class1	IR_256
3726	JUNB	NM_002229	281	330	IVV_T060117_C9_J21	374920	LOC374920	NM_199341.2	536	544	class1	IR_256
3726	JUNB	NM_002229	281	330	IVV_T060117_C9_P11	374920	LOC374920	NM_199341.2	535	547	class1	IR_256
3726	JUNB	NM_002229	281	330	IVV_S20060609_5TH_C9_03_D12	152687	ZNF595	NM_182524.1	464	486	class1	IR_257
3726	JUNB	NM_002229	281	330	IVV_T060117_C9_P09	152687	ZNF595	NM_182524.1	463	486	class1	IR_257
3726	JUNB	NM_002229	1	347	IVV_S20060609_5TH_D2_01_A09	4133	MAP2	NM_002374.3	67	76	class1	IR_272
3726	JUNB	NM_002229	1	347	IVV_S20060609_5TH_D2_01_B02	4133	MAP2	NM_002374.3	67	76	class1	IR_272
3726	JUNB	NM_002229	1	347	IVV_S20060609_5TH_D2_01_B09	4133	MAP2	NM_002374.3	67	76	class1	IR_272
3726	JUNB	NM_002229	1	347	IVV_S20060609_5TH_D2_01_B11	4133	MAP2	NM_002374.3	67	76	class1	IR_272
3726	JUNB	NM_002229	1	347	IVV_S20060609_5TH_D2_01_D07	4133	MAP2	NM_002374.3	67	76	class1	IR_272
3726	JUNB	NM_002229	1	347	IVV_S20060609_5TH_D2_01_E07	4133	MAP2	NM_002374.3	67	76	class1	IR_272
3726	JUNB	NM_002229	1	347	IVV_S20060609_5TH_D2_01_E10	4133	MAP2	NM_002374.3	67	76	class1	IR_272
3726	JUNB	NM_002229	1	347	IVV_S20060609_5TH_D2_01_G02	4133	MAP2	NM_002374.3	67	76	class1	IR_272
3726	JUNB	NM_002229	1	347	IVV_S20060609_5TH_D2_02_A11	4133	MAP2	NM_002374.3	67	76	class1	IR_272
3726	JUNB	NM_002229	1	347	IVV_S20060609_5TH_D2_02_B03	4133	MAP2	NM_002374.3	67	76	class1	IR_272
3726	JUNB	NM_002229	1	347	IVV_S20060609_5TH_D2_02_B06	4133	MAP2	NM_002374.3	67	76	class1	IR_272
3726	JUNB	NM_002229	1	347	IVV_S20060609_5TH_D2_02_E04	4133	MAP2	NM_002374.3	67	76	class1	IR_272
3726	JUNB	NM_002229	1	347	IVV_S20060609_5TH_D2_02_E08	4133	MAP2	NM_002374.3	67	76	class1	IR_272
3726	JUNB	NM_002229	1	347	IVV_S20060609_5TH_D2_02_F11	4133	MAP2	NM_002374.3	67	76	class1	IR_272
3726	JUNB	NM_002229	1	347	IVV_S20060609_5TH_D2_02_F12	4133	MAP2	NM_002374.3	67	76	class1	IR_272
3726	JUNB	NM_002229	1	347	IVV_S20060609_5TH_D2_02_G05	4133	MAP2	NM_002374.3	67	76	class1	IR_272
3726	JUNB	NM_002229	1	347	IVV_S20060609_5TH_D2_02_G07	4133	MAP2	NM_002374.3	67	76	class1	IR_272
3726	JUNB	NM_002229	1	347	IVV_S20060609_5TH_D2_02_G08	4133	MAP2	NM_002374.3	67	76	class1	IR_272
3726	JUNB	NM_002229	1	347	IVV_S20060609_5TH_D2_02_H04	4133	MAP2	NM_002374.3	67	76	class1	IR_272
3726	JUNB	NM_002229	1	347	IVV_S20060609_5TH_D2_03_A01	4133	MAP2	NM_002374.3	67	76	class1	IR_272
3726	JUNB	NM_002229	1	347	IVV_S20060609_5TH_D2_03_C08	4133	MAP2	NM_002374.3	67	76	class1	IR_272
3726	JUNB	NM_002229	1	347	IVV_S20060609_5TH_D2_03_C10	4133	MAP2	NM_002374.3	67	76	class1	IR_272
3726	JUNB	NM_002229	1	347	IVV_S20060609_5TH_D2_03_D01	4133	MAP2	NM_002374.3	67	76	class1	IR_272
3726	JUNB	NM_002229	1	347	IVV_S20060609_5TH_D2_03_D12	4133	MAP2	NM_002374.3	67	76	class1	IR_272
3726	JUNB	NM_002229	1	347	IVV_S20060609_5TH_D2_03_F02	4133	MAP2	NM_002374.3	67	76	class1	IR_272
3726	JUNB	NM_002229	1	347	IVV_S20060609_5TH_D2_03_F05	4133	MAP2	NM_002374.3	67	76	class1	IR_272
3726	JUNB	NM_002229	1	347	IVV_S20060609_5TH_D2_03_F07	4133	MAP2	NM_002374.3	67	76	class1	IR_272
3726	JUNB	NM_002229	1	347	IVV_S20060609_5TH_D2_03_F12	4133	MAP2	NM_002374.3	67	76	class1	IR_272
3726	JUNB	NM_002229	1	347	IVV_S20060609_5TH_D2_03_G11	4133	MAP2	NM_002374.3	67	76	class1	IR_272
3726	JUNB	NM_002229	1	347	IVV_S20060609_5TH_D2_03_H11	4133	MAP2	NM_002374.3	67	76	class1	IR_272
3726	JUNB	NM_002229	1	347	IVV_S20060609_5TH_D2_03_H12	4133	MAP2	NM_002374.3	67	76	class1	IR_272
3726	JUNB	NM_002229	1	347	IVV_S20060609_5TH_D2_04_A12	4133	MAP2	NM_002374.3	67	76	class1	IR_272
3726	JUNB	NM_002229	1	347	IVV_S20060609_5TH_D2_04_B01	4133	MAP2	NM_002374.3	67	76	class1	IR_272
3726	JUNB	NM_002229	1	347	IVV_S20060609_5TH_D2_04_C03	4133	MAP2	NM_002374.3	67	76	class1	IR_272
3726	JUNB	NM_002229	1	347	IVV_S20060609_5TH_D2_04_D01	4133	MAP2	NM_002374.3	67	76	class1	IR_272
3726	JUNB	NM_002229	1	347	IVV_S20060609_5TH_D2_04_D12	4133	MAP2	NM_002374.3	67	76	class1	IR_272
3726	JUNB	NM_002229	1	347	IVV_S20060609_5TH_D2_04_E08	4133	MAP2	NM_002374.3	67	76	class1	IR_272
3726	JUNB	NM_002229	1	347	IVV_S20060609_5TH_D2_04_E09	4133	MAP2	NM_002374.3	67	76	class1	IR_272
3726	JUNB	NM_002229	1	347	IVV_S20060609_5TH_D2_04_E12	4133	MAP2	NM_002374.3	67	76	class1	IR_272
3726	JUNB	NM_002229	1	347	IVV_S20060609_5TH_D2_04_H04	4133	MAP2	NM_002374.3	67	76	class1	IR_272
3726	JUNB	NM_002229	1	347	IVV_S20060609_7TH_D2_01_A03	4133	MAP2	NM_002374.3	67	76	class1	IR_272
3726	JUNB	NM_002229	1	347	IVV_S20060609_7TH_D2_01_A07	4133	MAP2	NM_002374.3	67	76	class1	IR_272
3726	JUNB	NM_002229	1	347	IVV_S20060609_7TH_D2_01_A08	4133	MAP2	NM_002374.3	67	76	class1	IR_272
3726	JUNB	NM_002229	1	347	IVV_S20060609_7TH_D2_01_A09	4133	MAP2	NM_002374.3	67	76	class1	IR_272
3726	JUNB	NM_002229	1	347	IVV_S20060609_7TH_D2_01_A11	4133	MAP2	NM_002374.3	67	76	class1	IR_272
3726	JUNB	NM_002229	1	347	IVV_S20060609_7TH_D2_01_B01	4133	MAP2	NM_002374.3	67	76	class1	IR_272
3726	JUNB	NM_002229	1	347	IVV_S20060609_7TH_D2_01_B03	4133	MAP2	NM_002374.3	67	76	class1	IR_272
3726	JUNB	NM_002229	1	347	IVV_S20060609_7TH_D2_01_B04	4133	MAP2	NM_002374.3	67	76	class1	IR_272
3726	JUNB	NM_002229	1	347	IVV_S20060609_7TH_D2_01_B06	4133	MAP2	NM_002374.3	67	76	class1	IR_272
3726	JUNB	NM_002229	1	347	IVV_S20060609_7TH_D2_01_B12	4133	MAP2	NM_002374.3	67	76	class1	IR_272
3726	JUNB	NM_002229	1	347	IVV_S20060609_7TH_D2_01_C02	4133	MAP2	NM_002374.3	67	76	class1	IR_272
3726	JUNB	NM_002229	1	347	IVV_S20060609_7TH_D2_01_C05	4133	MAP2	NM_002374.3	67	76	class1	IR_272
3726	JUNB	NM_002229	1	347	IVV_S20060609_7TH_D2_01_C07	4133	MAP2	NM_002374.3	67	76	class1	IR_272
3726	JUNB	NM_002229	1	347	IVV_S20060609_7TH_D2_01_C08	4133	MAP2	NM_002374.3	67	76	class1	IR_272
3726	JUNB	NM_002229	1	347	IVV_S20060609_7TH_D2_01_D02	4133	MAP2	NM_002374.3	67	76	class1	IR_272
3726	JUNB	NM_002229	1	347	IVV_S20060609_7TH_D2_01_D05	4133	MAP2	NM_002374.3	68	76	class1	IR_272
3726	JUNB	NM_002229	1	347	IVV_S20060609_7TH_D2_01_D06	4133	MAP2	NM_002374.3	67	76	class1	IR_272
3726	JUNB	NM_002229	1	347	IVV_S20060609_7TH_D2_01_D08	4133	MAP2	NM_002374.3	67	76	class1	IR_272
3726	JUNB	NM_002229	1	347	IVV_S20060609_7TH_D2_01_D09	4133	MAP2	NM_002374.3	67	76	class1	IR_272
3726	JUNB	NM_002229	1	347	IVV_S20060609_7TH_D2_01_E01	4133	MAP2	NM_002374.3	67	76	class1	IR_272
3726	JUNB	NM_002229	1	347	IVV_S20060609_7TH_D2_01_E03	4133	MAP2	NM_002374.3	67	76	class1	IR_272
3726	JUNB	NM_002229	1	347	IVV_S20060609_7TH_D2_01_E04	4133	MAP2	NM_002374.3	67	76	class1	IR_272
3726	JUNB	NM_002229	1	347	IVV_S20060609_7TH_D2_01_E05	4133	MAP2	NM_002374.3	67	76	class1	IR_272
3726	JUNB	NM_002229	1	347	IVV_S20060609_7TH_D2_01_E07	4133	MAP2	NM_002374.3	67	76	class1	IR_272
3726	JUNB	NM_002229	1	347	IVV_S20060609_7TH_D2_01_E08	4133	MAP2	NM_002374.3	67	76	class1	IR_272
3726	JUNB	NM_002229	1	347	IVV_S20060609_7TH_D2_01_E09	4133	MAP2	NM_002374.3	67	76	class1	IR_272
3726	JUNB	NM_002229	1	347	IVV_S20060609_7TH_D2_01_E11	4133	MAP2	NM_002374.3	67	76	class1	IR_272
3726	JUNB	NM_002229	1	347	IVV_S20060609_7TH_D2_01_E12	4133	MAP2	NM_002374.3	67	76	class1	IR_272
3726	JUNB	NM_002229	1	347	IVV_S20060609_7TH_D2_01_F03	4133	MAP2	NM_002374.3	67	76	class1	IR_272
3726	JUNB	NM_002229	1	347	IVV_S20060609_7TH_D2_01_F04	4133	MAP2	NM_002374.3	67	76	class1	IR_272
3726	JUNB	NM_002229	1	347	IVV_S20060609_7TH_D2_01_F05	4133	MAP2	NM_002374.3	67	76	class1	IR_272
3726	JUNB	NM_002229	1	347	IVV_S20060609_7TH_D2_01_F06	4133	MAP2	NM_002374.3	67	76	class1	IR_272
3726	JUNB	NM_002229	1	347	IVV_S20060609_7TH_D2_01_F07	4133	MAP2	NM_002374.3	67	76	class1	IR_272
3726	JUNB	NM_002229	1	347	IVV_S20060609_7TH_D2_01_F08	4133	MAP2	NM_002374.3	67	76	class1	IR_272
3726	JUNB	NM_002229	1	347	IVV_S20060609_7TH_D2_01_F09	4133	MAP2	NM_002374.3	67	76	class1	IR_272
3726	JUNB	NM_002229	1	347	IVV_S20060609_7TH_D2_01_G02	4133	MAP2	NM_002374.3	67	76	class1	IR_272
3726	JUNB	NM_002229	1	347	IVV_S20060609_7TH_D2_01_G04	4133	MAP2	NM_002374.3	67	76	class1	IR_272
3726	JUNB	NM_002229	1	347	IVV_S20060609_7TH_D2_01_G05	4133	MAP2	NM_002374.3	67	76	class1	IR_272
3726	JUNB	NM_002229	1	347	IVV_S20060609_7TH_D2_01_G08	4133	MAP2	NM_002374.3	67	76	class1	IR_272
3726	JUNB	NM_002229	1	347	IVV_S20060609_7TH_D2_01_G09	4133	MAP2	NM_002374.3	67	76	class1	IR_272
3726	JUNB	NM_002229	1	347	IVV_S20060609_7TH_D2_01_H05	4133	MAP2	NM_002374.3	67	76	class1	IR_272
3726	JUNB	NM_002229	1	347	IVV_S20060609_7TH_D2_01_H08	4133	MAP2	NM_002374.3	67	76	class1	IR_272
3726	JUNB	NM_002229	1	347	IVV_S20060609_7TH_D2_02_A01	4133	MAP2	NM_002374.3	67	76	class1	IR_272
3726	JUNB	NM_002229	1	347	IVV_S20060609_7TH_D2_02_A06	4133	MAP2	NM_002374.3	67	76	class1	IR_272
3726	JUNB	NM_002229	1	347	IVV_S20060609_7TH_D2_02_A11	4133	MAP2	NM_002374.3	67	76	class1	IR_272
3726	JUNB	NM_002229	1	347	IVV_S20060609_7TH_D2_02_A12	4133	MAP2	NM_002374.3	67	76	class1	IR_272
3726	JUNB	NM_002229	1	347	IVV_S20060609_7TH_D2_02_B03	4133	MAP2	NM_002374.3	67	76	class1	IR_272
3726	JUNB	NM_002229	1	347	IVV_S20060609_7TH_D2_02_B06	4133	MAP2	NM_002374.3	67	76	class1	IR_272
3726	JUNB	NM_002229	1	347	IVV_S20060609_7TH_D2_02_C01	4133	MAP2	NM_002374.3	67	76	class1	IR_272
3726	JUNB	NM_002229	1	347	IVV_S20060609_7TH_D2_02_C03	4133	MAP2	NM_002374.3	67	76	class1	IR_272
3726	JUNB	NM_002229	1	347	IVV_S20060609_7TH_D2_02_C04	4133	MAP2	NM_002374.3	67	76	class1	IR_272
3726	JUNB	NM_002229	1	347	IVV_S20060609_7TH_D2_02_C10	4133	MAP2	NM_002374.3	67	76	class1	IR_272
3726	JUNB	NM_002229	1	347	IVV_S20060609_7TH_D2_02_C11	4133	MAP2	NM_002374.3	67	76	class1	IR_272
3726	JUNB	NM_002229	1	347	IVV_S20060609_7TH_D2_02_D02	4133	MAP2	NM_002374.3	67	76	class1	IR_272
3726	JUNB	NM_002229	1	347	IVV_S20060609_7TH_D2_02_D03	4133	MAP2	NM_002374.3	67	76	class1	IR_272
3726	JUNB	NM_002229	1	347	IVV_S20060609_7TH_D2_02_D06	4133	MAP2	NM_002374.3	67	76	class1	IR_272
3726	JUNB	NM_002229	1	347	IVV_S20060609_7TH_D2_02_D08	4133	MAP2	NM_002374.3	67	76	class1	IR_272
3726	JUNB	NM_002229	1	347	IVV_S20060609_7TH_D2_02_D10	4133	MAP2	NM_002374.3	67	76	class1	IR_272
3726	JUNB	NM_002229	1	347	IVV_S20060609_7TH_D2_02_E02	4133	MAP2	NM_002374.3	67	76	class1	IR_272
3726	JUNB	NM_002229	1	347	IVV_S20060609_7TH_D2_02_E03	4133	MAP2	NM_002374.3	67	76	class1	IR_272
3726	JUNB	NM_002229	1	347	IVV_S20060609_7TH_D2_02_E04	4133	MAP2	NM_002374.3	67	76	class1	IR_272
3726	JUNB	NM_002229	1	347	IVV_S20060609_7TH_D2_02_E07	4133	MAP2	NM_002374.3	67	76	class1	IR_272
3726	JUNB	NM_002229	1	347	IVV_S20060609_7TH_D2_02_E08	4133	MAP2	NM_002374.3	67	76	class1	IR_272
3726	JUNB	NM_002229	1	347	IVV_S20060609_7TH_D2_02_E09	4133	MAP2	NM_002374.3	67	76	class1	IR_272
3726	JUNB	NM_002229	1	347	IVV_S20060609_7TH_D2_02_F07	4133	MAP2	NM_002374.3	67	76	class1	IR_272
3726	JUNB	NM_002229	1	347	IVV_S20060609_7TH_D2_02_F08	4133	MAP2	NM_002374.3	67	76	class1	IR_272
3726	JUNB	NM_002229	1	347	IVV_S20060609_7TH_D2_02_G01	4133	MAP2	NM_002374.3	67	76	class1	IR_272
3726	JUNB	NM_002229	1	347	IVV_S20060609_7TH_D2_02_G06	4133	MAP2	NM_002374.3	67	76	class1	IR_272
3726	JUNB	NM_002229	1	347	IVV_S20060609_7TH_D2_02_G07	4133	MAP2	NM_002374.3	67	76	class1	IR_272
3726	JUNB	NM_002229	1	347	IVV_S20060609_7TH_D2_02_G10	4133	MAP2	NM_002374.3	67	76	class1	IR_272
3726	JUNB	NM_002229	1	347	IVV_S20060609_7TH_D2_02_G11	4133	MAP2	NM_002374.3	67	76	class1	IR_272
3726	JUNB	NM_002229	1	347	IVV_S20060609_7TH_D2_02_G12	4133	MAP2	NM_002374.3	67	76	class1	IR_272
3726	JUNB	NM_002229	1	347	IVV_S20060609_7TH_D2_02_H05	4133	MAP2	NM_002374.3	68	76	class1	IR_272
3726	JUNB	NM_002229	1	347	IVV_S20060609_7TH_D2_03_A02	4133	MAP2	NM_002374.3	67	76	class1	IR_272
3726	JUNB	NM_002229	1	347	IVV_S20060609_7TH_D2_03_A04	4133	MAP2	NM_002374.3	67	76	class1	IR_272
3726	JUNB	NM_002229	1	347	IVV_S20060609_7TH_D2_03_A07	4133	MAP2	NM_002374.3	67	76	class1	IR_272
3726	JUNB	NM_002229	1	347	IVV_S20060609_7TH_D2_03_A09	4133	MAP2	NM_002374.3	67	76	class1	IR_272
3726	JUNB	NM_002229	1	347	IVV_S20060609_7TH_D2_03_A10	4133	MAP2	NM_002374.3	67	76	class1	IR_272
3726	JUNB	NM_002229	1	347	IVV_S20060609_7TH_D2_03_A11	4133	MAP2	NM_002374.3	67	76	class1	IR_272
3726	JUNB	NM_002229	1	347	IVV_S20060609_7TH_D2_03_A12	4133	MAP2	NM_002374.3	67	76	class1	IR_272
3726	JUNB	NM_002229	1	347	IVV_S20060609_7TH_D2_03_B03	4133	MAP2	NM_002374.3	67	76	class1	IR_272
3726	JUNB	NM_002229	1	347	IVV_S20060609_7TH_D2_03_B05	4133	MAP2	NM_002374.3	67	76	class1	IR_272
3726	JUNB	NM_002229	1	347	IVV_S20060609_7TH_D2_03_B06	4133	MAP2	NM_002374.3	67	76	class1	IR_272
3726	JUNB	NM_002229	1	347	IVV_S20060609_7TH_D2_03_B09	4133	MAP2	NM_002374.3	67	76	class1	IR_272
3726	JUNB	NM_002229	1	347	IVV_S20060609_7TH_D2_03_C02	4133	MAP2	NM_002374.3	67	76	class1	IR_272
3726	JUNB	NM_002229	1	347	IVV_S20060609_7TH_D2_03_C07	4133	MAP2	NM_002374.3	67	76	class1	IR_272
3726	JUNB	NM_002229	1	347	IVV_S20060609_7TH_D2_03_C09	4133	MAP2	NM_002374.3	67	76	class1	IR_272
3726	JUNB	NM_002229	1	347	IVV_S20060609_7TH_D2_03_C11	4133	MAP2	NM_002374.3	67	76	class1	IR_272
3726	JUNB	NM_002229	1	347	IVV_S20060609_7TH_D2_03_D01	4133	MAP2	NM_002374.3	67	76	class1	IR_272
3726	JUNB	NM_002229	1	347	IVV_S20060609_7TH_D2_03_D02	4133	MAP2	NM_002374.3	67	76	class1	IR_272
3726	JUNB	NM_002229	1	347	IVV_S20060609_7TH_D2_03_D04	4133	MAP2	NM_002374.3	68	76	class1	IR_272
3726	JUNB	NM_002229	1	347	IVV_S20060609_7TH_D2_03_D09	4133	MAP2	NM_002374.3	67	76	class1	IR_272
3726	JUNB	NM_002229	1	347	IVV_S20060609_7TH_D2_03_E02	4133	MAP2	NM_002374.3	68	76	class1	IR_272
3726	JUNB	NM_002229	1	347	IVV_S20060609_7TH_D2_03_E11	4133	MAP2	NM_002374.3	67	76	class1	IR_272
3726	JUNB	NM_002229	1	347	IVV_S20060609_7TH_D2_03_F01	4133	MAP2	NM_002374.3	67	76	class1	IR_272
3726	JUNB	NM_002229	1	347	IVV_S20060609_7TH_D2_03_F06	4133	MAP2	NM_002374.3	67	76	class1	IR_272
3726	JUNB	NM_002229	1	347	IVV_S20060609_7TH_D2_03_F07	4133	MAP2	NM_002374.3	67	76	class1	IR_272
3726	JUNB	NM_002229	1	347	IVV_S20060609_7TH_D2_03_G03	4133	MAP2	NM_002374.3	67	76	class1	IR_272
3726	JUNB	NM_002229	1	347	IVV_S20060609_7TH_D2_03_G05	4133	MAP2	NM_002374.3	67	76	class1	IR_272
3726	JUNB	NM_002229	1	347	IVV_S20060609_7TH_D2_03_G08	4133	MAP2	NM_002374.3	67	76	class1	IR_272
3726	JUNB	NM_002229	1	347	IVV_S20060609_7TH_D2_03_G09	4133	MAP2	NM_002374.3	67	76	class1	IR_272
3726	JUNB	NM_002229	1	347	IVV_S20060609_7TH_D2_03_G10	4133	MAP2	NM_002374.3	67	76	class1	IR_272
3726	JUNB	NM_002229	1	347	IVV_S20060609_7TH_D2_03_G12	4133	MAP2	NM_002374.3	68	76	class1	IR_272
3726	JUNB	NM_002229	1	347	IVV_S20060609_7TH_D2_03_H01	4133	MAP2	NM_002374.3	67	76	class1	IR_272
3726	JUNB	NM_002229	1	347	IVV_S20060609_7TH_D2_03_H07	4133	MAP2	NM_002374.3	67	76	class1	IR_272
3726	JUNB	NM_002229	1	347	IVV_S20060609_7TH_D2_04_A02	4133	MAP2	NM_002374.3	67	76	class1	IR_272
3726	JUNB	NM_002229	1	347	IVV_S20060609_7TH_D2_04_A03	4133	MAP2	NM_002374.3	67	76	class1	IR_272
3726	JUNB	NM_002229	1	347	IVV_S20060609_7TH_D2_04_A05	4133	MAP2	NM_002374.3	67	76	class1	IR_272
3726	JUNB	NM_002229	1	347	IVV_S20060609_7TH_D2_04_A07	4133	MAP2	NM_002374.3	67	76	class1	IR_272
3726	JUNB	NM_002229	1	347	IVV_S20060609_7TH_D2_04_A10	4133	MAP2	NM_002374.3	67	76	class1	IR_272
3726	JUNB	NM_002229	1	347	IVV_S20060609_7TH_D2_04_A12	4133	MAP2	NM_002374.3	67	76	class1	IR_272
3726	JUNB	NM_002229	1	347	IVV_S20060609_7TH_D2_04_B02	4133	MAP2	NM_002374.3	67	76	class1	IR_272
3726	JUNB	NM_002229	1	347	IVV_S20060609_7TH_D2_04_B05	4133	MAP2	NM_002374.3	67	76	class1	IR_272
3726	JUNB	NM_002229	1	347	IVV_S20060609_7TH_D2_04_B09	4133	MAP2	NM_002374.3	67	76	class1	IR_272
3726	JUNB	NM_002229	1	347	IVV_S20060609_7TH_D2_04_B11	4133	MAP2	NM_002374.3	67	76	class1	IR_272
3726	JUNB	NM_002229	1	347	IVV_S20060609_7TH_D2_04_B12	4133	MAP2	NM_002374.3	67	76	class1	IR_272
3726	JUNB	NM_002229	1	347	IVV_S20060609_7TH_D2_04_C04	4133	MAP2	NM_002374.3	67	76	class1	IR_272
3726	JUNB	NM_002229	1	347	IVV_S20060609_7TH_D2_04_C05	4133	MAP2	NM_002374.3	67	76	class1	IR_272
3726	JUNB	NM_002229	1	347	IVV_S20060609_7TH_D2_04_C07	4133	MAP2	NM_002374.3	67	76	class1	IR_272
3726	JUNB	NM_002229	1	347	IVV_S20060609_7TH_D2_04_C08	4133	MAP2	NM_002374.3	67	76	class1	IR_272
3726	JUNB	NM_002229	1	347	IVV_S20060609_7TH_D2_04_D02	4133	MAP2	NM_002374.3	67	76	class1	IR_272
3726	JUNB	NM_002229	1	347	IVV_S20060609_7TH_D2_04_D10	4133	MAP2	NM_002374.3	68	76	class1	IR_272
3726	JUNB	NM_002229	1	347	IVV_S20060609_7TH_D2_04_D11	4133	MAP2	NM_002374.3	67	76	class1	IR_272
3726	JUNB	NM_002229	1	347	IVV_S20060609_7TH_D2_04_D12	4133	MAP2	NM_002374.3	68	77	class1	IR_272
3726	JUNB	NM_002229	1	347	IVV_S20060609_7TH_D2_04_E05	4133	MAP2	NM_002374.3	67	76	class1	IR_272
3726	JUNB	NM_002229	1	347	IVV_S20060609_7TH_D2_04_E06	4133	MAP2	NM_002374.3	67	76	class1	IR_272
3726	JUNB	NM_002229	1	347	IVV_S20060609_7TH_D2_04_E07	4133	MAP2	NM_002374.3	67	76	class1	IR_272
3726	JUNB	NM_002229	1	347	IVV_S20060609_7TH_D2_04_E09	4133	MAP2	NM_002374.3	67	76	class1	IR_272
3726	JUNB	NM_002229	1	347	IVV_S20060609_7TH_D2_04_F05	4133	MAP2	NM_002374.3	67	76	class1	IR_272
3726	JUNB	NM_002229	1	347	IVV_S20060609_7TH_D2_04_F09	4133	MAP2	NM_002374.3	67	76	class1	IR_272
3726	JUNB	NM_002229	1	347	IVV_S20060609_7TH_D2_04_F10	4133	MAP2	NM_002374.3	68	76	class1	IR_272
3726	JUNB	NM_002229	1	347	IVV_S20060609_7TH_D2_04_G01	4133	MAP2	NM_002374.3	67	76	class1	IR_272
3726	JUNB	NM_002229	1	347	IVV_S20060609_7TH_D2_04_G02	4133	MAP2	NM_002374.3	67	76	class1	IR_272
3726	JUNB	NM_002229	1	347	IVV_S20060609_7TH_D2_04_G03	4133	MAP2	NM_002374.3	67	76	class1	IR_272
3726	JUNB	NM_002229	1	347	IVV_S20060609_7TH_D2_04_G07	4133	MAP2	NM_002374.3	67	76	class1	IR_272
3726	JUNB	NM_002229	1	347	IVV_S20060609_7TH_D2_04_G10	4133	MAP2	NM_002374.3	67	76	class1	IR_272
3726	JUNB	NM_002229	1	347	IVV_S20060609_7TH_D2_04_G11	4133	MAP2	NM_002374.3	67	76	class1	IR_272
3726	JUNB	NM_002229	1	347	IVV_S20060609_7TH_D2_04_G12	4133	MAP2	NM_002374.3	67	76	class1	IR_272
3726	JUNB	NM_002229	1	347	IVV_S20060609_7TH_D2_04_H06	4133	MAP2	NM_002374.3	67	76	class1	IR_272
3726	JUNB	NM_002229	1	347	IVV_S20060609_7TH_D2_04_H08	4133	MAP2	NM_002374.3	67	76	class1	IR_272
3726	JUNB	NM_002229	1	347	IVV_S20060609_7TH_D2_04_H10	4133	MAP2	NM_002374.3	67	76	class1	IR_272
3726	JUNB	NM_002229	1	347	IVV_T060117_D2_A23	4133	MAP2	NM_002374.3	67	76	class1	IR_272
3726	JUNB	NM_002229	1	347	IVV_T060117_D2_B17	4133	MAP2	NM_002374.3	67	76	class1	IR_272
3726	JUNB	NM_002229	1	347	IVV_T060117_D2_C09	4133	MAP2	NM_002374.3	67	76	class1	IR_272
3726	JUNB	NM_002229	1	347	IVV_T060117_D2_D04	4133	MAP2	NM_002374.3	67	76	class1	IR_272
3726	JUNB	NM_002229	1	347	IVV_T060117_D2_D21	4133	MAP2	NM_002374.3	67	76	class1	IR_272
3726	JUNB	NM_002229	1	347	IVV_T060117_D2_F17	4133	MAP2	NM_002374.3	67	76	class1	IR_272
3726	JUNB	NM_002229	1	347	IVV_T060117_D2_G19	4133	MAP2	NM_002374.3	67	76	class1	IR_272
3726	JUNB	NM_002229	1	347	IVV_T060117_D2_G20	4133	MAP2	NM_002374.3	67	76	class1	IR_272
3726	JUNB	NM_002229	1	347	IVV_T060117_D2_H20	4133	MAP2	NM_002374.3	67	76	class1	IR_272
3726	JUNB	NM_002229	1	347	IVV_T060117_D2_I11	4133	MAP2	NM_002374.3	67	76	class1	IR_272
3726	JUNB	NM_002229	1	347	IVV_T060117_D2_J03	4133	MAP2	NM_002374.3	67	76	class1	IR_272
3726	JUNB	NM_002229	1	347	IVV_T060117_D2_J07	4133	MAP2	NM_002374.3	67	76	class1	IR_272
3726	JUNB	NM_002229	1	347	IVV_T060117_D2_K08	4133	MAP2	NM_002374.3	68	76	class1	IR_272
3726	JUNB	NM_002229	1	347	IVV_T060117_D2_K15	4133	MAP2	NM_002374.3	67	76	class1	IR_272
3726	JUNB	NM_002229	1	347	IVV_T060117_D2_M03	4133	MAP2	NM_002374.3	67	76	class1	IR_272
3726	JUNB	NM_002229	1	347	IVV_T060117_D2_M16	4133	MAP2	NM_002374.3	67	76	class1	IR_272
3726	JUNB	NM_002229	1	347	IVV_T060117_D2_M22	4133	MAP2	NM_002374.3	67	76	class1	IR_272
3726	JUNB	NM_002229	1	347	IVV_T060117_D2_N03	4133	MAP2	NM_002374.3	67	76	class1	IR_272
3726	JUNB	NM_002229	1	347	IVV_T060117_D2_O06	4133	MAP2	NM_002374.3	67	76	class1	IR_272
3726	JUNB	NM_002229	1	347	IVV_T060117_D2_O19	4133	MAP2	NM_002374.3	67	76	class1	IR_272
3726	JUNB	NM_002229	1	347	IVV_T060117_D2_P01	4133	MAP2	NM_002374.3	67	76	class1	IR_272
3726	JUNB	NM_002229	1	347	IVV_T060117_D2_P11	4133	MAP2	NM_002374.3	67	76	class1	IR_272
3726	JUNB	NM_002229	1	347	IVV_T060117_D2_P14	4133	MAP2	NM_002374.3	67	76	class1	IR_272
3726	JUNB	NM_002229	1	347	IVV_T060117_D2_P21	4133	MAP2	NM_002374.3	67	76	class1	IR_272
3726	JUNB	NM_002229	1	347	IVV_S20060609_5TH_D2_01_C10	10915	TCERG1	NM_006706.3	999	1014	class1	IR_273
3726	JUNB	NM_002229	1	347	IVV_S20060609_5TH_D2_01_G07	10915	TCERG1	NM_006706.3	1000	1014	class1	IR_273
3726	JUNB	NM_002229	1	347	IVV_T060117_D2_J16	10915	TCERG1	NM_006706.3	999	1014	class1	IR_273
3726	JUNB	NM_002229	1	347	IVV_S20060609_5TH_D2_04_E05	334	APLP2	NM_001642.1	270	280	class1	IR_274
3726	JUNB	NM_002229	1	347	IVV_S20060609_5TH_D2_02_C08	334	APLP2	NM_001642.1	270	280	class1	IR_274
3726	JUNB	NM_002229	1	347	IVV_S20060609_5TH_D2_02_H02	334	APLP2	NM_001642.1	270	280	class1	IR_274
3726	JUNB	NM_002229	1	347	IVV_S20060609_5TH_D2_03_F01	334	APLP2	NM_001642.1	271	280	class1	IR_274
3726	JUNB	NM_002229	1	347	IVV_S20060609_5TH_D2_04_C02	334	APLP2	NM_001642.1	270	280	class1	IR_274
3726	JUNB	NM_002229	1	347	IVV_S20060609_5TH_D2_04_D08	334	APLP2	NM_001642.1	270	280	class1	IR_274
3726	JUNB	NM_002229	1	347	IVV_S20060609_7TH_D2_03_G11	334	APLP2	NM_001642.1	270	280	class1	IR_274
3726	JUNB	NM_002229	1	347	IVV_T060117_D2_B23	334	APLP2	NM_001642.1	270	280	class1	IR_274
3726	JUNB	NM_002229	1	347	IVV_T060117_D2_D08	334	APLP2	NM_001642.1	270	280	class1	IR_274
3726	JUNB	NM_002229	1	347	IVV_T060117_D2_E11	334	APLP2	NM_001642.1	270	280	class1	IR_274
3726	JUNB	NM_002229	1	347	IVV_S20060609_5TH_D2_02_F04	23358	USP24	XM_371254.5	1362	1373	class1	IR_275
3726	JUNB	NM_002229	1	347	IVV_S20060609_5TH_D2_04_E10	23358	USP24	XM_371254.5	1362	1373	class1	IR_275
3726	JUNB	NM_002229	1	347	IVV_S20060609_7TH_D2_02_A04	374928	MGC4728	NM_198542.1	18	30	class2	IR_508
3727	JUND	NM_005354	279	330	IVV_S20060609_5TH_D9_01_C07	8604	SLC25A12	NM_003705.2	194	205	class1	IR_292
3727	JUND	NM_005354	279	330	IVV_S20060609_5TH_D9_01_D04	8604	SLC25A12	NM_003705.2	194	207	class1	IR_292
3727	JUND	NM_005354	279	330	IVV_S20060609_5TH_D9_01_G05	8604	SLC25A12	NM_003705.2	193	207	class1	IR_292
3727	JUND	NM_005354	279	330	IVV_S20060609_5TH_D9_01_G08	8604	SLC25A12	NM_003705.2	193	207	class1	IR_292
3727	JUND	NM_005354	279	330	IVV_S20060609_5TH_D9_02_C09	8604	SLC25A12	NM_003705.2	177	205	class1	IR_292
3727	JUND	NM_005354	279	330	IVV_S20060609_5TH_D9_03_E03	8604	SLC25A12	NM_003705.2	177	205	class1	IR_292
3727	JUND	NM_005354	279	330	IVV_S20060609_5TH_D9_03_E10	8604	SLC25A12	NM_003705.2	193	207	class1	IR_292
3727	JUND	NM_005354	279	330	IVV_S20060609_5TH_D9_04_C08	8604	SLC25A12	NM_003705.2	188	207	class1	IR_292
3727	JUND	NM_005354	279	330	IVV_S20060609_5TH_D9_04_F04	8604	SLC25A12	NM_003705.2	193	207	class1	IR_292
3727	JUND	NM_005354	279	330	IVV_S20060609_5TH_D9_03_G10	645323	LOC645323	XM_932810.2	12	26	class1	IR_294
3727	JUND	NM_005354	279	330	IVV_S20060609_5TH_D9_04_C06	645323	LOC645323	XM_932810.2	12	26	class1	IR_294
3727	JUND	NM_005354	279	330	IVV_S20060609_5TH_D9_02_F12	10096	ACTR3	NM_005721.3	185	211	class2	IR_293
3727	JUND	NM_005354	279	330	IVV_S20060609_5TH_D9_04_E01	4735	SEPT2	NM_001008491.1	156	180	class2	IR_295
29956	LASS2	AK001105	1	230	IVV_S20060609_5TH_E7_01_B10	3320	HSP90AA1	NM_001017963.1	605	635	class2	IR_323
29956	LASS2	AK001105	1	230	IVV_S20060609_5TH_E7_01_H11	9568	GABBR2	NM_005458.5	820	831	class2	IR_324
29956	LASS2	AK001105	1	230	IVV_S20060609_5TH_E7_02_F03	23095	KIF1B	NM_015074.2	786	807	class2	IR_325
29956	LASS2	AK001105	1	230	IVV_S20060609_5TH_E7_02_G01	10213	PSMD14	NM_005805.2	212	223	class2	IR_326
29956	LASS2	AK001105	1	230	IVV_S20060609_5TH_E7_03_G03	8874	ARHGEF7	NM_003899.2	575	598	class2	IR_327
4149	MAX	NM_002382	1	160	IVV_T051018_C2_E02	2495	FTH1	NM_002032.2	164	176	class1	IR_669
4149	MAX	NM_002382	1	160	IVV_T051018_C2_F06	2495	FTH1	NM_002032.2	164	176	class1	IR_669
4149	MAX	NM_002382	1	160	IVV_T060117_C2_D21	2495	FTH1	NM_002032.2	164	178	class1	IR_669
4149	MAX	NM_002382	1	160	IVV_T051018_C2_B06	2495	FTH1	NM_002032.2	150	176	class1	IR_669,IR_670
4149	MAX	NM_002382	1	160	IVV_T051018_C2_I03	2495	FTH1	NM_002032.2	144	178	class1	IR_669,IR_670
4149	MAX	NM_002382	1	160	IVV_T051018_C2_K08	2495	FTH1	NM_002032.2	143	171	class1	IR_669,IR_670
4149	MAX	NM_002382	1	160	IVV_T051018_C2_N10	2495	FTH1	NM_002032.2	143	178	class1	IR_669,IR_670
4149	MAX	NM_002382	1	160	IVV_T051018_C2_G03	2495	FTH1	NM_002032.2	124	176	class1	IR_669,IR_670
4149	MAX	NM_002382	1	160	IVV_T060117_C2_H08	2495	FTH1	NM_002032.2	147	175	class1	IR_669,IR_670
4149	MAX	NM_002382	1	160	IVV_T060117_C2_H15	2495	FTH1	NM_002032.2	144	178	class1	IR_669,IR_670
4149	MAX	NM_002382	1	160	IVV_T060117_C2_N18	2495	FTH1	NM_002032.2	151	178	class1	IR_669,IR_670
4149	MAX	NM_002382	1	160	IVV_T060117_C2_P08	2495	FTH1	NM_002032.2	143	178	class1	IR_669,IR_670
4149	MAX	NM_002382	1	160	IVV_T060117_C2_H04	2495	FTH1	NM_002032.2	131	181	class1	IR_669,IR_670
4149	MAX	NM_002382	1	160	IVV_T060117_C2_I17	2495	FTH1	NM_002032.2	132	178	class1	IR_669,IR_670
4149	MAX	NM_002382	1	160	IVV_T060117_C2_I24	2495	FTH1	NM_002032.2	133	173	class1	IR_669,IR_670
4149	MAX	NM_002382	1	160	IVV_T060117_C2_J05	2495	FTH1	NM_002032.2	110	178	class1	IR_669,IR_670
4149	MAX	NM_002382	1	160	IVV_T060407_C02_D21	2495	FTH1	NM_002032.2	144	175	class1	IR_669,IR_670
4149	MAX	NM_002382	1	160	IVV_T060407_C02_K14	2495	FTH1	NM_002032.2	145	177	class1	IR_669,IR_670
4149	MAX	NM_002382	1	160	IVV_T060407_C02_L13	2495	FTH1	NM_002032.2	143	177	class1	IR_669,IR_670
4149	MAX	NM_002382	1	160	IVV_T060407_C02_M13	2495	FTH1	NM_002032.2	144	176	class1	IR_669,IR_670
4149	MAX	NM_002382	1	160	IVV_T060407_C02_C22	2495	FTH1	NM_002032.2	129	181	class1	IR_669,IR_670
4149	MAX	NM_002382	1	160	IVV_T060407_C02_C24	2495	FTH1	NM_002032.2	131	183	class1	IR_669,IR_670
4149	MAX	NM_002382	1	160	IVV_T060407_C02_H21	2495	FTH1	NM_002032.2	132	179	class1	IR_669,IR_670
4149	MAX	NM_002382	1	160	IVV_T060117_C2_G02	2495	FTH1	NM_002032.2	124	159	class1	IR_670
4149	MAX	NM_002382	1	160	IVV_T051018_C2_C07	11224	RPL35	NM_007209.3	66	99	class1	IR_672
4149	MAX	NM_002382	1	160	IVV_T060117_C2_H14	11224	RPL35	NM_007209.3	52	101	class1	IR_672
4149	MAX	NM_002382	1	160	IVV_T060407_C02_M17	11224	RPL35	NM_007209.3	74	103	class1	IR_672
4149	MAX	NM_002382	1	160	IVV_T051018_C2_C23	2521	FUS	NM_004960.2	436	474	class1	IR_673
4149	MAX	NM_002382	1	160	IVV_T060117_C2_B21	2521	FUS	NM_004960.2	449	478	class1	IR_673
4149	MAX	NM_002382	1	160	IVV_T060117_C2_F14	2521	FUS	NM_004960.2	436	475	class1	IR_673
4149	MAX	NM_002382	1	160	IVV_T051018_C2_D17	6164	RPL34	NM_000995.3	68	112	class1	IR_674
4149	MAX	NM_002382	1	160	IVV_T051018_C2_K02	6164	RPL34	NM_000995.3	48	112	class1	IR_674
4149	MAX	NM_002382	1	160	IVV_T051018_C2_K05	6164	RPL34	NM_000995.3	69	112	class1	IR_674
4149	MAX	NM_002382	1	160	IVV_T051018_C2_M24	6164	RPL34	NM_000995.3	71	114	class1	IR_674
4149	MAX	NM_002382	1	160	IVV_T051018_C2_N12	6164	RPL34	NM_000995.3	70	112	class1	IR_674
4149	MAX	NM_002382	1	160	IVV_T051018_C2_N13	6164	RPL34	NM_000995.3	42	113	class1	IR_674
4149	MAX	NM_002382	1	160	IVV_T060117_C2_E03	6164	RPL34	NM_000995.3	50	112	class1	IR_674
4149	MAX	NM_002382	1	160	IVV_T060117_C2_E09	6164	RPL34	NM_000995.3	74	114	class1	IR_674
4149	MAX	NM_002382	1	160	IVV_T060117_C2_G21	6164	RPL34	NM_000995.3	58	111	class1	IR_674
4149	MAX	NM_002382	1	160	IVV_T060117_C2_H13	6164	RPL34	NM_000995.3	69	113	class1	IR_674
4149	MAX	NM_002382	1	160	IVV_T060117_C2_K10	6164	RPL34	NM_000995.3	72	114	class1	IR_674
4149	MAX	NM_002382	1	160	IVV_T060117_C2_L06	6164	RPL34	NM_000995.3	68	113	class1	IR_674
4149	MAX	NM_002382	1	160	IVV_T060117_C2_L19	6164	RPL34	NM_000995.3	77	114	class1	IR_674
4149	MAX	NM_002382	1	160	IVV_T060117_C2_N21	6164	RPL34	NM_000995.3	71	113	class1	IR_674
4149	MAX	NM_002382	1	160	IVV_T060117_C2_O20	6164	RPL34	NM_000995.3	77	111	class1	IR_674
4149	MAX	NM_002382	1	160	IVV_T060117_C2_P23	6164	RPL34	NM_000995.3	70	112	class1	IR_674
4149	MAX	NM_002382	1	160	IVV_T060407_C02_B23	6164	RPL34	NM_000995.3	77	108	class1	IR_674
4149	MAX	NM_002382	1	160	IVV_T060407_C02_C10	6164	RPL34	NM_000995.3	80	113	class1	IR_674
4149	MAX	NM_002382	1	160	IVV_T060407_C02_D02	6164	RPL34	NM_000995.3	74	108	class1	IR_674
4149	MAX	NM_002382	1	160	IVV_T060407_C02_D24	6164	RPL34	NM_000995.3	70	114	class1	IR_674
4149	MAX	NM_002382	1	160	IVV_T060407_C02_F14	6164	RPL34	NM_000995.3	36	101	class1	IR_674
4149	MAX	NM_002382	1	160	IVV_T060407_C02_G11	6164	RPL34	NM_000995.3	40	112	class1	IR_674
4149	MAX	NM_002382	1	160	IVV_T060407_C02_G19	6164	RPL34	NM_000995.3	40	112	class1	IR_674
4149	MAX	NM_002382	1	160	IVV_T060407_C02_G23	6164	RPL34	NM_000995.3	75	112	class1	IR_674
4149	MAX	NM_002382	1	160	IVV_T060407_C02_G24	6164	RPL34	NM_000995.3	77	113	class1	IR_674
4149	MAX	NM_002382	1	160	IVV_T060407_C02_I13	6164	RPL34	NM_000995.3	74	112	class1	IR_674
4149	MAX	NM_002382	1	160	IVV_T060407_C02_I16	6164	RPL34	NM_000995.3	36	99	class1	IR_674
4149	MAX	NM_002382	1	160	IVV_T060407_C02_I23	6164	RPL34	NM_000995.3	40	109	class1	IR_674
4149	MAX	NM_002382	1	160	IVV_T060407_C02_J07	6164	RPL34	NM_000995.3	74	108	class1	IR_674
4149	MAX	NM_002382	1	160	IVV_T060407_C02_M04	6164	RPL34	NM_000995.3	40	112	class1	IR_674
4149	MAX	NM_002382	1	160	IVV_T060407_C02_M07	6164	RPL34	NM_000995.3	74	114	class1	IR_674
4149	MAX	NM_002382	1	160	IVV_T060407_C02_M14	6164	RPL34	NM_000995.3	69	112	class1	IR_674
4149	MAX	NM_002382	1	160	IVV_T051018_C2_G12	7846	TUBA3	NM_006009.2	348	411	class1	IR_677
4149	MAX	NM_002382	1	160	IVV_T051018_C2_K10	7846	TUBA3	NM_006009.2	376	450	class1	IR_677
4149	MAX	NM_002382	1	160	IVV_T051018_C2_B20	23061	TBC1D9B	NM_198868.2	680	759	class2	IR_671
4149	MAX	NM_002382	1	160	IVV_T051018_C2_F08	5214	PFKP	NM_002627.3	627	688	class2	IR_675
4149	MAX	NM_002382	1	160	IVV_T051018_C2_G05	1778	DYNC1H1	NM_001376.3	637	697	class2	IR_676
4149	MAX	NM_002382	1	160	IVV_T051018_C2_H16	10382	TUBB4	NM_006087.2	345	409	class2	IR_678
4149	MAX	NM_002382	1	160	IVV_T051018_C2_P19	54737	HSMPP8	NM_017520.2	306	329	class2	IR_679
4149	MAX	NM_002382	1	160	IVV_T060117_C2_A02	9092	SART1	NM_005146.3	267	324	class2	IR_779
4149	MAX	NM_002382	1	160	IVV_T060117_C2_C01	5413	SEPT5	NM_002688.4	294	340	class2	IR_780
4149	MAX	NM_002382	1	160	IVV_T060117_C2_E21	5713	PSMD7	NM_002811.3	122	164	class2	IR_781
4149	MAX	NM_002382	1	160	IVV_T060117_C2_F09	1819	DRG2	NM_001388.3	186	210	class2	IR_782
4149	MAX	NM_002382	1	160	IVV_T060117_C2_F20	3181	HNRPA2B1	NM_031243.1	186	224	class2	IR_783
4149	MAX	NM_002382	1	160	IVV_T060117_C2_F21	9049	AIP	NM_003977.1	4	81	class2	IR_784
4149	MAX	NM_002382	1	160	IVV_T060117_C2_H09	2550	GABBR1	NM_001470.1	508	547	class2	IR_785
4149	MAX	NM_002382	1	160	IVV_T060117_C2_H22	293	SLC25A6	NM_001636.1	193	260	class2	IR_786
4149	MAX	NM_002382	1	160	IVV_T060117_C2_I19	3098	HK1	NM_033500.1	578	634	class2	IR_787
4149	MAX	NM_002382	1	160	IVV_T060117_C2_L09	1938	EEF2	NM_001961.3	25	62	class2	IR_788
4149	MAX	NM_002382	1	160	IVV_T060407_C02_D13	2686	GGTL3	NM_178026.2	605	641	class2	IR_932
4149	MAX	NM_002382	1	160	IVV_T060407_C02_E15	10014	HDAC5	NM_001015053.1	703	760	class2	IR_933
4193	MDM2	BC001146	1	427	IVV_S20051122_E01_01_B06	22883	CLSTN1	NM_001009566.1	213	229	class1	IR_129
4193	MDM2	BC001146	1	427	IVV_S20051122_E01_04_D12	22883	CLSTN1	NM_001009566.1	220	230	class1	IR_129
4193	MDM2	BC001146	1	427	IVV_T060117_A5_I18	3725	JUN	NM_002228.3	270	324	class1	IR_131
4193	MDM2	BC001146	1	427	IVV_T050726_H01_M17	3725	JUN	NM_002228.3	284	326	class1	IR_131
4193	MDM2	BC001146	1	427	IVV_S20051122_E01_02_E05	3725	JUN	NM_002228.3	245	326	class1	IR_131
4193	MDM2	BC001146	1	427	IVV_T060117_A5_E17	3725	JUN	NM_002228.3	273	324	class1	IR_131
4193	MDM2	BC001146	1	427	IVV_T060117_A5_N13	3725	JUN	NM_002228.3	284	326	class1	IR_131
4193	MDM2	BC001146	1	427	IVV_T060117_A5_O07	3725	JUN	NM_002228.3	270	315	class1	IR_131
4193	MDM2	BC001146	1	427	IVV_T060407_E01_H13	3725	JUN	NM_002228.3	273	320	class1	IR_131
4193	MDM2	BC001146	1	427	IVV_S050511_E1_5TH_B05	351	APP	NM_000484.2	211	231	class1	IR_22
4193	MDM2	BC001146	1	188	IVV_T050726_Mhdm24_2_M14	351	APP	NM_000484.2	204	228	class1	IR_22
4193	MDM2	BC001146	1	188	IVV_T050726_Mhdm24_2_H11	351	APP	NM_000484.2	176	238	class1	IR_22
4193	MDM2	BC001146	1	427	IVV_T050511_E01_A02	351	APP	NM_000484.2	212	256	class1	IR_22
4193	MDM2	BC001146	1	427	IVV_S20060609_5TH_E1_03_B03	1191	CLU	NM_203339.1	55	76	class1	IR_302
4193	MDM2	BC001146	1	427	IVV_T050726_H01_A21	1191	CLU	NM_203339.1	53	74	class1	IR_302
4193	MDM2	BC001146	1	427	IVV_T051018_E1_M11	1191	CLU	NM_203339.1	35	79	class1	IR_302
4193	MDM2	BC001146	1	427	IVV_S050511_H1_5TH_E02	140890	SFRS12	NM_139168.2	332	366	class1	IR_37
4193	MDM2	BC001146	1	188	IVV_S20060609_7TH_A9_01_F07	140890	SFRS12	NM_139168.2	318	342	class1	IR_37
4193	MDM2	BC001146	1	188	IVV_S20060609_6TH_A9_02_G03	6262	RYR2	NM_001035.2	4284	4293	class1	IR_418
4193	MDM2	BC001146	1	188	IVV_S20060609_7TH_A9_01_D10	6262	RYR2	NM_001035.2	4284	4293	class1	IR_418
4193	MDM2	BC001146	1	188	IVV_S20060609_7TH_A9_02_D09	6262	RYR2	NM_001035.2	4284	4293	class1	IR_418
4193	MDM2	BC001146	1	188	IVV_S20060609_7TH_A9_02_E07	6262	RYR2	NM_001035.2	4284	4293	class1	IR_418
4193	MDM2	BC001146	1	188	IVV_S20060609_7TH_A9_02_G10	6262	RYR2	NM_001035.2	4284	4293	class1	IR_418
4193	MDM2	BC001146	1	188	IVV_S20060609_7TH_A9_01_A05	6418	SET	NM_003011.1	265	275	class1	IR_468
4193	MDM2	BC001146	1	427	IVV_T060117_A5_C09	6418	SET	NM_003011.1	258	267	class1	IR_468,IR_758
4193	MDM2	BC001146	1	188	IVV_S20060609_7TH_A9_02_A09	7184	HSP90B1	NM_003299.1	36	52	class1	IR_469
4193	MDM2	BC001146	1	427	IVV_T050726_H01_J14	7184	HSP90B1	NM_003299.1	27	53	class1	IR_469
4193	MDM2	BC001146	1	427	IVV_T051018_E1_K12	7184	HSP90B1	NM_003299.1	42	53	class1	IR_469
4193	MDM2	BC001146	1	427	IVV_T060117_A5_H24	7184	HSP90B1	NM_003299.1	41	51	class1	IR_469
4193	MDM2	BC001146	1	188	IVV_S20051122_A09_03_D02	54883	CCDC49	NM_017748.3	202	215	class1	IR_53
4193	MDM2	BC001146	1	188	IVV_S20051122_A09_03_F10	54883	CCDC49	NM_017748.3	202	215	class1	IR_53
4193	MDM2	BC001146	1	427	IVV_S20051122_E01_02_A08	6418	SET	NM_003011.1	224	243	class1	IR_55
4193	MDM2	BC001146	1	427	IVV_S20060609_5TH_E1_04_H09	6418	SET	NM_003011.1	216	230	class1	IR_55
4193	MDM2	BC001146	1	188	IVV_S20051122_A09_03_H03	6418	SET	NM_003011.1	224	246	class1	IR_55,IR_56
4193	MDM2	BC001146	1	427	IVV_T060117_A5_D09	6418	SET	NM_003011.1	244	263	class1	IR_56,IR_758
4193	MDM2	BC001146	1	427	IVV_T050511_H01_D09	4691	NCL	NM_005381.2	182	208	class1	IR_574
4193	MDM2	BC001146	1	427	IVV_T060117_A5_D03	4691	NCL	NM_005381.2	188	205	class1	IR_574
4193	MDM2	BC001146	1	427	IVV_T050511_H01_H03	7692	ZNF133	NM_003434.3	606	623	class1	IR_575
4193	MDM2	BC001146	1	427	IVV_T050726_H01_N09	7692	ZNF133	NM_003434.3	606	622	class1	IR_575
4193	MDM2	BC001146	1	427	IVV_T060117_A5_G21	7692	ZNF133	NM_003434.3	606	622	class1	IR_575
4193	MDM2	BC001146	1	427	IVV_T050726_H01_O16	3727	JUND	NM_005354.3	292	328	class1	IR_602
4193	MDM2	BC001146	1	427	IVV_T060117_A5_G19	3727	JUND	NM_005354.3	293	328	class1	IR_602
4193	MDM2	BC001146	1	427	IVV_T060117_A5_H15	3727	JUND	NM_005354.3	282	340	class1	IR_602
4193	MDM2	BC001146	1	427	IVV_T060117_A5_K06	3727	JUND	NM_005354.3	282	340	class1	IR_602
4193	MDM2	BC001146	1	188	IVV_T050726_Mhdm24_2_G13	5315	PKM2	NM_182470.1	168	179	class1	IR_606
4193	MDM2	BC001146	1	188	IVV_T050726_Mhdm24_2_N10	5315	PKM2	NM_182470.1	162	208	class1	IR_606
4193	MDM2	BC001146	1	427	IVV_T060117_A5_D17	4691	NCL	NM_005381.2	227	244	class1	IR_759
4193	MDM2	BC001146	1	427	IVV_T060407_E01_P06	4691	NCL	NM_005381.2	223	250	class1	IR_759
4193	MDM2	BC001146	1	188	IVV_040730hdm2A4hi1_02	10471	PFDN6	NM_014260.2	15	32	class2	IR_1
4193	MDM2	BC001146	1	427	IVV_S20051122_E01_01_A06	9448	MAP4K4	NM_145686.2	426	436	class2	IR_128
4193	MDM2	BC001146	1	427	IVV_S20051122_E01_01_G01	10458	BAIAP2	NM_017450.1	412	451	class2	IR_130
4193	MDM2	BC001146	1	427	IVV_S20051122_E01_02_H10	6728	SRP19	NM_003135.1	120	133	class2	IR_132
4193	MDM2	BC001146	1	427	IVV_S20051122_E01_03_D04	1937	EEF1G	NM_001404.4	225	237	class2	IR_133
4193	MDM2	BC001146	1	427	IVV_S20051122_E01_04_A04	3312	HSPA8	NM_006597.3	556	568	class2	IR_134
4193	MDM2	BC001146	1	188	IVV_040730hdm2D4hi1_08	127254	C1orf173	NM_001002912.3	423	432	class2	IR_2
4193	MDM2	BC001146	1	427	IVV_S20060609_5TH_E1_01_E02	11152	WDR45	NM_007075.3	121	142	class2	IR_296
4193	MDM2	BC001146	1	427	IVV_S20060609_5TH_E1_01_F12	4141	MARS	NM_004990.2	844	865	class2	IR_297
4193	MDM2	BC001146	1	427	IVV_S20060609_5TH_E1_02_B08	5923	RASGRF1	NM_002891.3	1065	1081	class2	IR_298
4193	MDM2	BC001146	1	427	IVV_S20060609_5TH_E1_02_D07	221061	C10orf38	NM_001010924.1	466	475	class2	IR_299
4193	MDM2	BC001146	1	188	IVV_040730hdm2H10hi1_16	5955	RCN2	NM_002902.1	199	216	class2	IR_3
4193	MDM2	BC001146	1	427	IVV_S20060609_5TH_E1_02_F09	53343	NUDT9	NM_024047.3	270	282	class2	IR_300
4193	MDM2	BC001146	1	427	IVV_S20060609_5TH_E1_02_H08	22890	ZBTB1	NM_014950.1	566	575	class2	IR_301
4193	MDM2	BC001146	1	427	IVV_S20060609_5TH_E1_03_E05	5789	PTPRD	NM_001040712.1	748	758	class2	IR_303
4193	MDM2	BC001146	1	427	IVV_S050511_H1_5TH_E08	2950	GSTP1	NM_000852.2	25	41	class2	IR_38
4193	MDM2	BC001146	1	188	IVV_S20060609_6TH_A9_01_D03	23500	DAAM2	NM_015345.2	462	476	class2	IR_415
4193	MDM2	BC001146	1	188	IVV_S20060609_6TH_A9_01_D05	3480	IGF1R	NM_000875.3	873	890	class2	IR_416
4193	MDM2	BC001146	1	188	IVV_S20060609_6TH_A9_01_E09	3798	KIF5A	NM_004984.2	177	187	class2	IR_417
4193	MDM2	BC001146	1	188	IVV_S20060609_6TH_A9_03_G10	6157	RPL27A	NM_000990.3	132	141	class2	IR_419
4193	MDM2	BC001146	1	188	IVV_S20060609_6TH_A9_04_F10	9459	ARHGEF6	NM_004840.2	499	511	class2	IR_420
4193	MDM2	BC001146	1	188	IVV_S20060609_6TH_A9_04_G04	1616	DAXX	NM_001350.3	471	483	class2	IR_421
4193	MDM2	BC001146	1	188	IVV_S20060609_7TH_A9_02_E02	2555	GABRA2	NM_000807.1	344	353	class2	IR_470
4193	MDM2	BC001146	1	188	IVV_S20060609_7TH_A9_02_E06	9638	FEZ1	NM_005103.3	280	291	class2	IR_471
4193	MDM2	BC001146	1	188	IVV_S20060609_7TH_A9_02_G02	10724	MGEA5	NM_012215.1	482	493	class2	IR_472
4193	MDM2	BC001146	1	188	IVV_S20060609_7TH_A9_03_D08	7257	TSNAX	NM_005999.2	278	287	class2	IR_473
4193	MDM2	BC001146	1	188	IVV_S20051122_A09_01_G03	6902	TBCA	NM_004607.2	24	34	class2	IR_51
4193	MDM2	BC001146	1	188	IVV_S20051122_A09_02_H07	90321	ZNF766	NM_001010851.2	77	88	class2	IR_52
4193	MDM2	BC001146	1	188	IVV_S20051122_A09_03_F09	55967	NDUFA12	NM_018838.3	67	77	class2	IR_54
4193	MDM2	BC001146	1	427	IVV_T050511_E01_F12	4741	NEFM	NM_005382.1	698	732	class2	IR_569
4193	MDM2	BC001146	1	188	IVV_S20051122_A09_04_D04	64710	NUCKS1	NM_022731.2	118	127	class2	IR_57
4193	MDM2	BC001146	1	427	IVV_T050726_H01_D24	24148	PRPF6	NM_012469.3	706	755	class2	IR_599
4193	MDM2	BC001146	1	427	IVV_T050726_H01_G04	2060	EPS15	NM_001981.2	852	867	class2	IR_600
4193	MDM2	BC001146	1	427	IVV_T050726_H01_K06	7430	VIL2	NM_003379.3	319	342	class2	IR_601
4193	MDM2	BC001146	1	427	IVV_T050726_H01_P08	1131	CHRM3	XM_001130695.1	84	100	class2	IR_603
4193	MDM2	BC001146	1	188	IVV_T050726_Mhdm24_2_A24	54680	C1orf181	NM_017953.2	34	58	class2	IR_604
4193	MDM2	BC001146	1	188	IVV_T050726_Mhdm24_2_E03	6804	STX1A	NM_004603.2	54	70	class2	IR_605
4193	MDM2	BC001146	1	188	IVV_T050726_Mhdm24_2_K08	4201	MEA1	NM_014623.2	10	22	class2	IR_607
4193	MDM2	BC001146	1	188	IVV_T050726_Mhdm24_2_N01	25963	TMEM87A	NM_015497.2	469	511	class2	IR_608
4193	MDM2	BC001146	1	427	IVV_T051018_E1_G06	23215	BAT2D1	NM_015172.3	554	583	class2	IR_702
4193	MDM2	BC001146	1	427	IVV_T051018_E1_G22	9126	SMC3	NM_005445.3	460	476	class2	IR_703
4193	MDM2	BC001146	1	427	IVV_T051018_E1_H05	4133	MAP2	NM_002374.3	614	623	class2	IR_704
4193	MDM2	BC001146	1	427	IVV_T051018_E1_L22	11231	SEC63	NM_007214.3	590	607	class2	IR_705
4193	MDM2	BC001146	1	427	IVV_T051018_E1_N17	203068	TUBB	NM_178014.2	404	414	class2	IR_706
4193	MDM2	BC001146	1	427	IVV_T060117_A5_K14	51650	MRPS33	NM_016071.2	73	100	class2	IR_760
4193	MDM2	BC001146	1	427	IVV_T060407_E01_E09	7468	WHSC1	NM_133334.2	158	171	class2	IR_949
4193	MDM2	BC001146	1	427	IVV_T060407_E01_K07	284695	ZNF326	NM_182976.1	486	506	class2	IR_950
4193	MDM2	BC001146	1	427	IVV_T060407_E01_L04	4673	NAP1L1	NM_139207.1	347	357	class2	IR_951
7978	MTERF	NM_006980	1	399	IVV_T051018_H7_D07	23233	EXOC6B	XM_039570.10	352	361	class1	IR_746
7978	MTERF	NM_006980	1	399	IVV_T051018_H7_A05	23233	EXOC6B	XM_039570.10	352	361	class1	IR_746
7978	MTERF	NM_006980	1	399	IVV_T051018_H7_C09	23233	EXOC6B	XM_039570.10	352	360	class1	IR_746
7978	MTERF	NM_006980	1	399	IVV_T051018_H7_I06	23233	EXOC6B	XM_039570.10	342	361	class1	IR_746
7978	MTERF	NM_006980	1	399	IVV_T051018_H7_L13	23233	EXOC6B	XM_039570.10	342	397	class1	IR_746
7978	MTERF	NM_006980	1	399	IVV_T051018_H7_M13	23233	EXOC6B	XM_039570.10	352	360	class1	IR_746
7978	MTERF	NM_006980	1	399	IVV_T051018_H7_N22	23233	EXOC6B	XM_039570.10	337	361	class1	IR_746
7978	MTERF	NM_006980	1	399	IVV_T051018_H7_P14	23233	EXOC6B	XM_039570.10	352	361	class1	IR_746
7978	MTERF	NM_006980	1	399	IVV_T060117_H7_E20	23233	EXOC6B	XM_039570.10	352	361	class1	IR_746
7978	MTERF	NM_006980	1	399	IVV_T060117_H7_J04	23233	EXOC6B	XM_039570.10	342	362	class1	IR_746
7978	MTERF	NM_006980	1	399	IVV_T060117_H7_P05	23233	EXOC6B	XM_039570.10	342	361	class1	IR_746
7978	MTERF	NM_006980	1	399	IVV_T060407_H07_F22	23233	EXOC6B	XM_039570.10	352	361	class1	IR_746
7978	MTERF	NM_006980	1	399	IVV_T051018_H7_A08	6418	SET	NM_003011.1	94	103	class1	IR_747
7978	MTERF	NM_006980	1	399	IVV_T051018_H7_B16	6418	SET	NM_003011.1	94	103	class1	IR_747
7978	MTERF	NM_006980	1	399	IVV_T051018_H7_D03	6418	SET	NM_003011.1	91	103	class1	IR_747
7978	MTERF	NM_006980	1	399	IVV_T051018_H7_D04	6418	SET	NM_003011.1	90	103	class1	IR_747
7978	MTERF	NM_006980	1	399	IVV_T051018_H7_D08	6418	SET	NM_003011.1	90	103	class1	IR_747
7978	MTERF	NM_006980	1	399	IVV_T051018_H7_D11	6418	SET	NM_003011.1	91	103	class1	IR_747
7978	MTERF	NM_006980	1	399	IVV_T051018_H7_D22	6418	SET	NM_003011.1	91	103	class1	IR_747
7978	MTERF	NM_006980	1	399	IVV_T051018_H7_E10	6418	SET	NM_003011.1	90	103	class1	IR_747
7978	MTERF	NM_006980	1	399	IVV_T051018_H7_F24	6418	SET	NM_003011.1	90	103	class1	IR_747
7978	MTERF	NM_006980	1	399	IVV_T051018_H7_G05	6418	SET	NM_003011.1	94	103	class1	IR_747
7978	MTERF	NM_006980	1	399	IVV_T051018_H7_I02	6418	SET	NM_003011.1	90	103	class1	IR_747
7978	MTERF	NM_006980	1	399	IVV_T051018_H7_J09	6418	SET	NM_003011.1	90	103	class1	IR_747
7978	MTERF	NM_006980	1	399	IVV_T051018_H7_L14	6418	SET	NM_003011.1	95	104	class1	IR_747
7978	MTERF	NM_006980	1	399	IVV_T051018_H7_L20	6418	SET	NM_003011.1	90	103	class1	IR_747
7978	MTERF	NM_006980	1	399	IVV_T051018_H7_M10	6418	SET	NM_003011.1	90	103	class1	IR_747
7978	MTERF	NM_006980	1	399	IVV_T051018_H7_M19	6418	SET	NM_003011.1	91	103	class1	IR_747
7978	MTERF	NM_006980	1	399	IVV_T051018_H7_O15	6418	SET	NM_003011.1	91	103	class1	IR_747
7978	MTERF	NM_006980	1	399	IVV_T051018_H7_O23	6418	SET	NM_003011.1	91	103	class1	IR_747
7978	MTERF	NM_006980	1	399	IVV_T051018_H7_P02	6418	SET	NM_003011.1	91	103	class1	IR_747
7978	MTERF	NM_006980	1	399	IVV_T060117_H7_A08	6418	SET	NM_003011.1	90	103	class1	IR_747
7978	MTERF	NM_006980	1	399	IVV_T060117_H7_B09	6418	SET	NM_003011.1	90	103	class1	IR_747
7978	MTERF	NM_006980	1	399	IVV_T060117_H7_C13	6418	SET	NM_003011.1	90	103	class1	IR_747
7978	MTERF	NM_006980	1	399	IVV_T060117_H7_E05	6418	SET	NM_003011.1	91	103	class1	IR_747
7978	MTERF	NM_006980	1	399	IVV_T060117_H7_F14	6418	SET	NM_003011.1	92	103	class1	IR_747
7978	MTERF	NM_006980	1	399	IVV_T060117_H7_H19	6418	SET	NM_003011.1	90	103	class1	IR_747
7978	MTERF	NM_006980	1	399	IVV_T060117_H7_I12	6418	SET	NM_003011.1	91	103	class1	IR_747
7978	MTERF	NM_006980	1	399	IVV_T060117_H7_M06	6418	SET	NM_003011.1	91	103	class1	IR_747
7978	MTERF	NM_006980	1	399	IVV_T060407_H07_A22	6418	SET	NM_003011.1	91	103	class1	IR_747
7978	MTERF	NM_006980	1	399	IVV_T060407_H07_E09	6418	SET	NM_003011.1	90	103	class1	IR_747
7978	MTERF	NM_006980	1	399	IVV_T060407_H07_H13	6418	SET	NM_003011.1	94	103	class1	IR_747
7978	MTERF	NM_006980	1	399	IVV_T060407_H07_J01	6418	SET	NM_003011.1	91	103	class1	IR_747
7978	MTERF	NM_006980	1	399	IVV_T060407_H07_K20	6418	SET	NM_003011.1	91	103	class1	IR_747
7978	MTERF	NM_006980	1	399	IVV_T060407_H07_K24	6418	SET	NM_003011.1	94	103	class1	IR_747
7978	MTERF	NM_006980	1	399	IVV_T051018_H7_B07	1639	DCTN1	NM_004082.2	249	264	class1	IR_749
7978	MTERF	NM_006980	1	399	IVV_T051018_H7_B20	1639	DCTN1	NM_004082.2	249	264	class1	IR_749
7978	MTERF	NM_006980	1	399	IVV_T051018_H7_J16	1639	DCTN1	NM_004082.2	249	264	class1	IR_749
7978	MTERF	NM_006980	1	399	IVV_T051018_H7_K04	1639	DCTN1	NM_004082.2	249	264	class1	IR_749
7978	MTERF	NM_006980	1	399	IVV_T051018_H7_L07	1639	DCTN1	NM_004082.2	249	264	class1	IR_749
7978	MTERF	NM_006980	1	399	IVV_T051018_H7_L24	1639	DCTN1	NM_004082.2	249	264	class1	IR_749
7978	MTERF	NM_006980	1	399	IVV_T051018_H7_N19	1639	DCTN1	NM_004082.2	249	264	class1	IR_749
7978	MTERF	NM_006980	1	399	IVV_T051018_H7_P08	1639	DCTN1	NM_004082.2	249	264	class1	IR_749
7978	MTERF	NM_006980	1	399	IVV_T060117_H7_A12	1639	DCTN1	NM_004082.2	249	264	class1	IR_749
7978	MTERF	NM_006980	1	399	IVV_T060117_H7_B16	1639	DCTN1	NM_004082.2	249	264	class1	IR_749
7978	MTERF	NM_006980	1	399	IVV_T060117_H7_B21	1639	DCTN1	NM_004082.2	249	264	class1	IR_749
7978	MTERF	NM_006980	1	399	IVV_T060117_H7_C05	1639	DCTN1	NM_004082.2	249	264	class1	IR_749
7978	MTERF	NM_006980	1	399	IVV_T060117_H7_C12	1639	DCTN1	NM_004082.2	249	264	class1	IR_749
7978	MTERF	NM_006980	1	399	IVV_T060117_H7_C14	1639	DCTN1	NM_004082.2	249	264	class1	IR_749
7978	MTERF	NM_006980	1	399	IVV_T060117_H7_C20	1639	DCTN1	NM_004082.2	249	264	class1	IR_749
7978	MTERF	NM_006980	1	399	IVV_T060117_H7_F04	1639	DCTN1	NM_004082.2	250	264	class1	IR_749
7978	MTERF	NM_006980	1	399	IVV_T060117_H7_G14	1639	DCTN1	NM_004082.2	249	264	class1	IR_749
7978	MTERF	NM_006980	1	399	IVV_T060117_H7_G23	1639	DCTN1	NM_004082.2	248	263	class1	IR_749
7978	MTERF	NM_006980	1	399	IVV_T060117_H7_I11	1639	DCTN1	NM_004082.2	249	264	class1	IR_749
7978	MTERF	NM_006980	1	399	IVV_T060117_H7_I13	1639	DCTN1	NM_004082.2	249	264	class1	IR_749
7978	MTERF	NM_006980	1	399	IVV_T060117_H7_I18	1639	DCTN1	NM_004082.2	249	264	class1	IR_749
7978	MTERF	NM_006980	1	399	IVV_T060117_H7_J24	1639	DCTN1	NM_004082.2	249	264	class1	IR_749
7978	MTERF	NM_006980	1	399	IVV_T060117_H7_L14	1639	DCTN1	NM_004082.2	249	264	class1	IR_749
7978	MTERF	NM_006980	1	399	IVV_T060117_H7_L17	1639	DCTN1	NM_004082.2	249	264	class1	IR_749
7978	MTERF	NM_006980	1	399	IVV_T060117_H7_O02	1639	DCTN1	NM_004082.2	249	264	class1	IR_749
7978	MTERF	NM_006980	1	399	IVV_T060117_H7_P12	1639	DCTN1	NM_004082.2	249	264	class1	IR_749
7978	MTERF	NM_006980	1	399	IVV_T060117_H7_P17	1639	DCTN1	NM_004082.2	250	262	class1	IR_749
7978	MTERF	NM_006980	1	399	IVV_T060407_H07_A14	1639	DCTN1	NM_004082.2	249	264	class1	IR_749
7978	MTERF	NM_006980	1	399	IVV_T060407_H07_A18	1639	DCTN1	NM_004082.2	249	264	class1	IR_749
7978	MTERF	NM_006980	1	399	IVV_T060407_H07_B19	1639	DCTN1	NM_004082.2	249	264	class1	IR_749
7978	MTERF	NM_006980	1	399	IVV_T060407_H07_C20	1639	DCTN1	NM_004082.2	249	264	class1	IR_749
7978	MTERF	NM_006980	1	399	IVV_T060407_H07_D18	1639	DCTN1	NM_004082.2	250	264	class1	IR_749
7978	MTERF	NM_006980	1	399	IVV_T060407_H07_F14	1639	DCTN1	NM_004082.2	249	264	class1	IR_749
7978	MTERF	NM_006980	1	399	IVV_T060407_H07_G09	1639	DCTN1	NM_004082.2	249	264	class1	IR_749
7978	MTERF	NM_006980	1	399	IVV_T060407_H07_H16	1639	DCTN1	NM_004082.2	249	264	class1	IR_749
7978	MTERF	NM_006980	1	399	IVV_T060407_H07_H17	1639	DCTN1	NM_004082.2	249	264	class1	IR_749
7978	MTERF	NM_006980	1	399	IVV_T060407_H07_I18	1639	DCTN1	NM_004082.2	249	264	class1	IR_749
7978	MTERF	NM_006980	1	399	IVV_T060407_H07_K03	1639	DCTN1	NM_004082.2	249	264	class1	IR_749
7978	MTERF	NM_006980	1	399	IVV_T060407_H07_K13	1639	DCTN1	NM_004082.2	249	264	class1	IR_749
7978	MTERF	NM_006980	1	399	IVV_T060407_H07_L01	1639	DCTN1	NM_004082.2	249	264	class1	IR_749
7978	MTERF	NM_006980	1	399	IVV_T060407_H07_L17	1639	DCTN1	NM_004082.2	249	264	class1	IR_749
7978	MTERF	NM_006980	1	399	IVV_T060407_H07_M12	1639	DCTN1	NM_004082.2	249	264	class1	IR_749
7978	MTERF	NM_006980	1	399	IVV_T060407_H07_M24	1639	DCTN1	NM_004082.2	249	264	class1	IR_749
7978	MTERF	NM_006980	1	399	IVV_T060407_H07_P06	1639	DCTN1	NM_004082.2	249	264	class1	IR_749
7978	MTERF	NM_006980	1	399	IVV_T060407_H07_P18	1639	DCTN1	NM_004082.2	249	264	class1	IR_749
7978	MTERF	NM_006980	1	399	IVV_T051018_H7_C07	54843	SYTL2	NM_032943.2	362	373	class1	IR_750
7978	MTERF	NM_006980	1	399	IVV_T051018_H7_D01	54843	SYTL2	NM_032943.2	363	373	class1	IR_750
7978	MTERF	NM_006980	1	399	IVV_T051018_H7_D12	54843	SYTL2	NM_032943.2	362	373	class1	IR_750
7978	MTERF	NM_006980	1	399	IVV_T051018_H7_G24	54843	SYTL2	NM_032943.2	362	373	class1	IR_750
7978	MTERF	NM_006980	1	399	IVV_T051018_H7_H03	54843	SYTL2	NM_032943.2	362	373	class1	IR_750
7978	MTERF	NM_006980	1	399	IVV_T051018_H7_H11	54843	SYTL2	NM_032943.2	362	373	class1	IR_750
7978	MTERF	NM_006980	1	399	IVV_T051018_H7_I16	54843	SYTL2	NM_032943.2	362	373	class1	IR_750
7978	MTERF	NM_006980	1	399	IVV_T051018_H7_K09	54843	SYTL2	NM_032943.2	362	373	class1	IR_750
7978	MTERF	NM_006980	1	399	IVV_T051018_H7_K23	54843	SYTL2	NM_032943.2	362	373	class1	IR_750
7978	MTERF	NM_006980	1	399	IVV_T051018_H7_M02	54843	SYTL2	NM_032943.2	362	373	class1	IR_750
7978	MTERF	NM_006980	1	399	IVV_T051018_H7_N08	54843	SYTL2	NM_032943.2	362	373	class1	IR_750
7978	MTERF	NM_006980	1	399	IVV_T051018_H7_N24	54843	SYTL2	NM_032943.2	362	373	class1	IR_750
7978	MTERF	NM_006980	1	399	IVV_T051018_H7_O11	54843	SYTL2	NM_032943.2	362	373	class1	IR_750
7978	MTERF	NM_006980	1	399	IVV_T051018_H7_P07	54843	SYTL2	NM_032943.2	362	373	class1	IR_750
7978	MTERF	NM_006980	1	399	IVV_T051018_H7_P12	54843	SYTL2	NM_032943.2	362	373	class1	IR_750
7978	MTERF	NM_006980	1	399	IVV_T051018_H7_P19	54843	SYTL2	NM_032943.2	362	373	class1	IR_750
7978	MTERF	NM_006980	1	399	IVV_T060117_H7_A17	54843	SYTL2	NM_032943.2	362	373	class1	IR_750
7978	MTERF	NM_006980	1	399	IVV_T060117_H7_F21	54843	SYTL2	NM_032943.2	362	373	class1	IR_750
7978	MTERF	NM_006980	1	399	IVV_T060117_H7_H11	54843	SYTL2	NM_032943.2	362	371	class1	IR_750
7978	MTERF	NM_006980	1	399	IVV_T060117_H7_L23	54843	SYTL2	NM_032943.2	362	373	class1	IR_750
7978	MTERF	NM_006980	1	399	IVV_T060117_H7_M13	54843	SYTL2	NM_032943.2	362	373	class1	IR_750
7978	MTERF	NM_006980	1	399	IVV_T060117_H7_M23	54843	SYTL2	NM_032943.2	362	373	class1	IR_750
7978	MTERF	NM_006980	1	399	IVV_T060117_H7_N09	54843	SYTL2	NM_032943.2	362	373	class1	IR_750
7978	MTERF	NM_006980	1	399	IVV_T060117_H7_N11	54843	SYTL2	NM_032943.2	362	373	class1	IR_750
7978	MTERF	NM_006980	1	399	IVV_T060117_H7_O03	54843	SYTL2	NM_032943.2	362	373	class1	IR_750
7978	MTERF	NM_006980	1	399	IVV_T060117_H7_O13	54843	SYTL2	NM_032943.2	362	373	class1	IR_750
7978	MTERF	NM_006980	1	399	IVV_T060407_H07_A04	54843	SYTL2	NM_032943.2	362	373	class1	IR_750
7978	MTERF	NM_006980	1	399	IVV_T060407_H07_A09	54843	SYTL2	NM_032943.2	362	373	class1	IR_750
7978	MTERF	NM_006980	1	399	IVV_T060407_H07_A16	54843	SYTL2	NM_032943.2	362	373	class1	IR_750
7978	MTERF	NM_006980	1	399	IVV_T060407_H07_B09	54843	SYTL2	NM_032943.2	362	373	class1	IR_750
7978	MTERF	NM_006980	1	399	IVV_T060407_H07_C23	54843	SYTL2	NM_032943.2	362	373	class1	IR_750
7978	MTERF	NM_006980	1	399	IVV_T060407_H07_D05	54843	SYTL2	NM_032943.2	362	373	class1	IR_750
7978	MTERF	NM_006980	1	399	IVV_T060407_H07_D21	54843	SYTL2	NM_032943.2	362	373	class1	IR_750
7978	MTERF	NM_006980	1	399	IVV_T060407_H07_E12	54843	SYTL2	NM_032943.2	362	373	class1	IR_750
7978	MTERF	NM_006980	1	399	IVV_T060407_H07_E22	54843	SYTL2	NM_032943.2	362	373	class1	IR_750
7978	MTERF	NM_006980	1	399	IVV_T060407_H07_F11	54843	SYTL2	NM_032943.2	362	373	class1	IR_750
7978	MTERF	NM_006980	1	399	IVV_T060407_H07_G10	54843	SYTL2	NM_032943.2	362	373	class1	IR_750
7978	MTERF	NM_006980	1	399	IVV_T060407_H07_H21	54843	SYTL2	NM_032943.2	362	373	class1	IR_750
7978	MTERF	NM_006980	1	399	IVV_T060407_H07_I09	54843	SYTL2	NM_032943.2	362	373	class1	IR_750
7978	MTERF	NM_006980	1	399	IVV_T060407_H07_K18	54843	SYTL2	NM_032943.2	362	373	class1	IR_750
7978	MTERF	NM_006980	1	399	IVV_T060407_H07_L02	54843	SYTL2	NM_032943.2	362	373	class1	IR_750
7978	MTERF	NM_006980	1	399	IVV_T060407_H07_L14	54843	SYTL2	NM_032943.2	362	373	class1	IR_750
7978	MTERF	NM_006980	1	399	IVV_T060407_H07_M10	54843	SYTL2	NM_032943.2	362	373	class1	IR_750
7978	MTERF	NM_006980	1	399	IVV_T060407_H07_P05	54843	SYTL2	NM_032943.2	362	373	class1	IR_750
7978	MTERF	NM_006980	1	399	IVV_T051018_H7_G08	134218	DNAJA5	NM_194283.3	370	378	class1	IR_752
7978	MTERF	NM_006980	1	399	IVV_T051018_H7_H04	134218	DNAJA5	NM_194283.3	370	380	class1	IR_752
7978	MTERF	NM_006980	1	399	IVV_T051018_H7_I11	134218	DNAJA5	NM_194283.3	370	393	class1	IR_752
7978	MTERF	NM_006980	1	399	IVV_T051018_H7_K01	134218	DNAJA5	NM_194283.3	370	379	class1	IR_752
7978	MTERF	NM_006980	1	399	IVV_T051018_H7_K19	134218	DNAJA5	NM_194283.3	370	378	class1	IR_752
7978	MTERF	NM_006980	1	399	IVV_T051018_H7_M03	134218	DNAJA5	NM_194283.3	372	394	class1	IR_752
7978	MTERF	NM_006980	1	399	IVV_T051018_H7_M07	134218	DNAJA5	NM_194283.3	370	379	class1	IR_752
7978	MTERF	NM_006980	1	399	IVV_T051018_H7_O02	134218	DNAJA5	NM_194283.3	370	380	class1	IR_752
7978	MTERF	NM_006980	1	399	IVV_T060117_H7_A10	134218	DNAJA5	NM_194283.3	364	395	class1	IR_752
7978	MTERF	NM_006980	1	399	IVV_T060117_H7_A23	134218	DNAJA5	NM_194283.3	371	394	class1	IR_752
7978	MTERF	NM_006980	1	399	IVV_T060117_H7_B04	134218	DNAJA5	NM_194283.3	370	378	class1	IR_752
7978	MTERF	NM_006980	1	399	IVV_T060117_H7_D07	134218	DNAJA5	NM_194283.3	370	380	class1	IR_752
7978	MTERF	NM_006980	1	399	IVV_T060117_H7_E12	134218	DNAJA5	NM_194283.3	370	379	class1	IR_752
7978	MTERF	NM_006980	1	399	IVV_T060117_H7_E22	134218	DNAJA5	NM_194283.3	363	380	class1	IR_752
7978	MTERF	NM_006980	1	399	IVV_T060117_H7_I09	134218	DNAJA5	NM_194283.3	372	395	class1	IR_752
7978	MTERF	NM_006980	1	399	IVV_T060117_H7_I14	134218	DNAJA5	NM_194283.3	364	395	class1	IR_752
7978	MTERF	NM_006980	1	399	IVV_T060117_H7_J01	134218	DNAJA5	NM_194283.3	370	378	class1	IR_752
7978	MTERF	NM_006980	1	399	IVV_T060117_H7_J07	134218	DNAJA5	NM_194283.3	370	379	class1	IR_752
7978	MTERF	NM_006980	1	399	IVV_T060117_H7_J09	134218	DNAJA5	NM_194283.3	370	379	class1	IR_752
7978	MTERF	NM_006980	1	399	IVV_T060117_H7_K06	134218	DNAJA5	NM_194283.3	370	379	class1	IR_752
7978	MTERF	NM_006980	1	399	IVV_T060117_H7_K10	134218	DNAJA5	NM_194283.3	372	395	class1	IR_752
7978	MTERF	NM_006980	1	399	IVV_T060117_H7_L09	134218	DNAJA5	NM_194283.3	370	380	class1	IR_752
7978	MTERF	NM_006980	1	399	IVV_T060117_H7_P04	134218	DNAJA5	NM_194283.3	370	380	class1	IR_752
7978	MTERF	NM_006980	1	399	IVV_T060117_H7_P20	134218	DNAJA5	NM_194283.3	364	395	class1	IR_752
7978	MTERF	NM_006980	1	399	IVV_T060407_H07_B20	134218	DNAJA5	NM_194283.3	370	379	class1	IR_752
7978	MTERF	NM_006980	1	399	IVV_T060407_H07_E02	134218	DNAJA5	NM_194283.3	364	395	class1	IR_752
7978	MTERF	NM_006980	1	399	IVV_T060407_H07_F08	134218	DNAJA5	NM_194283.3	370	379	class1	IR_752
7978	MTERF	NM_006980	1	399	IVV_T060407_H07_K02	134218	DNAJA5	NM_194283.3	370	378	class1	IR_752
7978	MTERF	NM_006980	1	399	IVV_T060407_H07_L20	134218	DNAJA5	NM_194283.3	370	380	class1	IR_752
7978	MTERF	NM_006980	1	399	IVV_T060407_H07_M17	134218	DNAJA5	NM_194283.3	370	379	class1	IR_752
7978	MTERF	NM_006980	1	399	IVV_T060407_H07_M21	134218	DNAJA5	NM_194283.3	372	390	class1	IR_752
7978	MTERF	NM_006980	1	399	IVV_T060407_H07_N01	134218	DNAJA5	NM_194283.3	370	380	class1	IR_752
7978	MTERF	NM_006980	1	399	IVV_T060407_H07_N02	134218	DNAJA5	NM_194283.3	370	395	class1	IR_752
7978	MTERF	NM_006980	1	399	IVV_T060407_H07_O06	134218	DNAJA5	NM_194283.3	370	380	class1	IR_752
7978	MTERF	NM_006980	1	399	IVV_T051018_H7_A15	4131	MAP1B	NM_005909.2	935	946	class2	IR_748
7978	MTERF	NM_006980	1	399	IVV_T051018_H7_E17	134218	DNAJA5	NM_194283.3	440	469	class2	IR_751
7978	MTERF	NM_006980	1	399	IVV_T051018_H7_N05	55714	ODZ3	XM_940722.2	783	797	class2	IR_753
7978	MTERF	NM_006980	1	399	IVV_T051018_H7_O03	287	ANK2	NM_020977.2	1777	1801	class2	IR_754
7978	MTERF	NM_006980	1	399	IVV_T060117_H7_C01	8727	CTNNAL1	NM_003798.1	90	112	class2	IR_913
7978	MTERF	NM_006980	1	399	IVV_T060117_H7_C17	51280	GOLPH2	NM_016548.2	328	347	class2	IR_914
4602	MYB	BC064955	90	193	IVV_T060117_H10_O24	26019	UPF2	NM_080599.1	939	957	class1	IR_908
4602	MYB	BC064955	90	193	IVV_T060117_H10_P10	26019	UPF2	NM_080599.1	939	957	class1	IR_908
4602	MYB	BC064955	90	193	IVV_S20060609_5TH_H10_01_H07	26059	ERC2	NM_015576.1	522	539	class2	IR_383
4602	MYB	BC064955	90	193	IVV_S20060609_5TH_H10_03_H12	6383	SDC2	NM_002998.3	110	126	class2	IR_384
4602	MYB	BC064955	90	193	IVV_S20060609_5TH_H10_04_G05	1349	COX7B	NM_001866.2	63	77	class2	IR_385
4602	MYB	BC064955	1	640	IVV_S20060609_7TH_G5_02_G09	196441	CCDC131	NM_144982.4	388	397	class2	IR_559
4602	MYB	BC064955	1	640	IVV_S20060609_7TH_G5_03_E11	5763	PTMS	NM_002824.4	40	69	class2	IR_560
4602	MYB	BC064955	1	640	IVV_T051018_G5_G13	55904	MLL5	NM_182931.2	355	372	class2	IR_742
4602	MYB	BC064955	1	640	IVV_T051018_G5_G15	27018	NGFRAP1	NM_206915.1	63	79	class2	IR_743
4602	MYB	BC064955	1	640	IVV_T051018_G5_J21	4685	NCAM2	NM_004540.2	628	642	class2	IR_744
4602	MYB	BC064955	1	640	IVV_T051018_G5_P18	9739	SETD1A	NM_014712.1	981	991	class2	IR_745
4602	MYB	BC064955	1	640	IVV_T060117_G5_A24	53616	ADAM22	NM_021723.2	120	138	class2	IR_888
4602	MYB	BC064955	1	640	IVV_T060117_G5_F19	25832	NBPF14	NM_015383.1	814	825	class2	IR_889
4602	MYB	BC064955	1	640	IVV_T060117_G5_M07	26234	FBXL5	NM_012161.2	99	113	class2	IR_890
4602	MYB	BC064955	1	640	IVV_T060117_G5_O16	3796	KIF2A	NM_004520.1	654	665	class2	IR_891
4602	MYB	BC064955	1	640	IVV_T060117_G5_P18	196441	CCDC131	NM_144982.4	434	448	class2	IR_892
4602	MYB	BC064955	1	640	IVV_T060117_G5_P21	9611	NCOR1	NM_006311.2	1199	1208	class2	IR_893
4602	MYB	BC064955	90	193	IVV_T060117_H10_B16	27253	PCDH17	NM_001040429.2	975	1005	class2	IR_907
4609	MYC	NM_002467	355	439	IVV_T051018_B9_C02	57498	KIDINS220	NM_020738.1	238	299	class1	IR_653
4609	MYC	NM_002467	355	439	IVV_T051018_B9_D07	57498	KIDINS220	NM_020738.1	238	299	class1	IR_653
4609	MYC	NM_002467	355	439	IVV_T051018_B9_D24	57498	KIDINS220	NM_020738.1	238	299	class1	IR_653
4609	MYC	NM_002467	355	439	IVV_T051018_B9_F09	57498	KIDINS220	NM_020738.1	238	286	class1	IR_653
4609	MYC	NM_002467	355	439	IVV_T051018_B9_F13	57498	KIDINS220	NM_020738.1	238	299	class1	IR_653
4609	MYC	NM_002467	355	439	IVV_T051018_B9_L03	57498	KIDINS220	NM_020738.1	238	299	class1	IR_653
4609	MYC	NM_002467	355	439	IVV_T060117_B9_A15	57498	KIDINS220	NM_020738.1	238	299	class1	IR_653
4609	MYC	NM_002467	355	439	IVV_T051018_B9_A08	57498	KIDINS220	NM_020738.1	238	299	class1	IR_653
4609	MYC	NM_002467	355	439	IVV_T051018_B9_A13	57498	KIDINS220	NM_020738.1	238	299	class1	IR_653
4609	MYC	NM_002467	355	439	IVV_T060117_B9_B11	57498	KIDINS220	NM_020738.1	238	299	class1	IR_653
4609	MYC	NM_002467	355	439	IVV_T060117_B9_C04	57498	KIDINS220	NM_020738.1	238	299	class1	IR_653
4609	MYC	NM_002467	355	439	IVV_T051018_B9_B19	57498	KIDINS220	NM_020738.1	238	299	class1	IR_653
4609	MYC	NM_002467	355	439	IVV_T051018_B9_B21	57498	KIDINS220	NM_020738.1	238	299	class1	IR_653
4609	MYC	NM_002467	355	439	IVV_T060117_B9_C13	57498	KIDINS220	NM_020738.1	238	299	class1	IR_653
4609	MYC	NM_002467	355	439	IVV_T051018_B9_D08	57498	KIDINS220	NM_020738.1	238	299	class1	IR_653
4609	MYC	NM_002467	355	439	IVV_T051018_B9_D14	57498	KIDINS220	NM_020738.1	228	300	class1	IR_653
4609	MYC	NM_002467	355	439	IVV_T051018_B9_E13	57498	KIDINS220	NM_020738.1	238	299	class1	IR_653
4609	MYC	NM_002467	355	439	IVV_T051018_B9_E20	57498	KIDINS220	NM_020738.1	238	299	class1	IR_653
4609	MYC	NM_002467	355	439	IVV_T051018_B9_G13	57498	KIDINS220	NM_020738.1	238	298	class1	IR_653
4609	MYC	NM_002467	355	439	IVV_T051018_B9_G24	57498	KIDINS220	NM_020738.1	252	313	class1	IR_653
4609	MYC	NM_002467	355	439	IVV_T051018_B9_H09	57498	KIDINS220	NM_020738.1	238	299	class1	IR_653
4609	MYC	NM_002467	355	439	IVV_T051018_B9_H11	57498	KIDINS220	NM_020738.1	238	299	class1	IR_653
4609	MYC	NM_002467	355	439	IVV_T060117_B9_D21	57498	KIDINS220	NM_020738.1	238	313	class1	IR_653
4609	MYC	NM_002467	355	439	IVV_T051018_B9_I09	57498	KIDINS220	NM_020738.1	238	299	class1	IR_653
4609	MYC	NM_002467	355	439	IVV_T051018_B9_I15	57498	KIDINS220	NM_020738.1	238	299	class1	IR_653
4609	MYC	NM_002467	355	439	IVV_T051018_B9_I22	57498	KIDINS220	NM_020738.1	238	299	class1	IR_653
4609	MYC	NM_002467	355	439	IVV_T051018_B9_M22	57498	KIDINS220	NM_020738.1	238	299	class1	IR_653
4609	MYC	NM_002467	355	439	IVV_T051018_B9_N09	57498	KIDINS220	NM_020738.1	238	299	class1	IR_653
4609	MYC	NM_002467	355	439	IVV_T051018_B9_O06	57498	KIDINS220	NM_020738.1	238	299	class1	IR_653
4609	MYC	NM_002467	355	439	IVV_T051018_B9_O07	57498	KIDINS220	NM_020738.1	238	299	class1	IR_653
4609	MYC	NM_002467	355	439	IVV_T051018_B9_O13	57498	KIDINS220	NM_020738.1	238	299	class1	IR_653
4609	MYC	NM_002467	355	439	IVV_T051018_B9_P01	57498	KIDINS220	NM_020738.1	238	299	class1	IR_653
4609	MYC	NM_002467	355	439	IVV_T051018_B9_P04	57498	KIDINS220	NM_020738.1	238	299	class1	IR_653
4609	MYC	NM_002467	355	439	IVV_T051018_B9_P12	57498	KIDINS220	NM_020738.1	238	299	class1	IR_653
4609	MYC	NM_002467	355	439	IVV_T060117_B9_H03	57498	KIDINS220	NM_020738.1	238	299	class1	IR_653
4609	MYC	NM_002467	355	439	IVV_T060117_B9_A08	57498	KIDINS220	NM_020738.1	238	299	class1	IR_653
4609	MYC	NM_002467	355	439	IVV_T060117_B9_A20	57498	KIDINS220	NM_020738.1	238	299	class1	IR_653
4609	MYC	NM_002467	355	439	IVV_T060117_B9_A21	57498	KIDINS220	NM_020738.1	238	299	class1	IR_653
4609	MYC	NM_002467	355	439	IVV_T060117_B9_B01	57498	KIDINS220	NM_020738.1	238	299	class1	IR_653
4609	MYC	NM_002467	355	439	IVV_T060117_B9_B02	57498	KIDINS220	NM_020738.1	238	299	class1	IR_653
4609	MYC	NM_002467	355	439	IVV_T060117_B9_B05	57498	KIDINS220	NM_020738.1	238	299	class1	IR_653
4609	MYC	NM_002467	355	439	IVV_T060117_B9_B06	57498	KIDINS220	NM_020738.1	238	299	class1	IR_653
4609	MYC	NM_002467	355	439	IVV_T060117_B9_B10	57498	KIDINS220	NM_020738.1	238	299	class1	IR_653
4609	MYC	NM_002467	355	439	IVV_T060117_B9_C08	57498	KIDINS220	NM_020738.1	238	299	class1	IR_653
4609	MYC	NM_002467	355	439	IVV_T060117_B9_C09	57498	KIDINS220	NM_020738.1	238	299	class1	IR_653
4609	MYC	NM_002467	355	439	IVV_T060117_B9_C15	57498	KIDINS220	NM_020738.1	238	299	class1	IR_653
4609	MYC	NM_002467	355	439	IVV_T060117_B9_J24	57498	KIDINS220	NM_020738.1	238	299	class1	IR_653
4609	MYC	NM_002467	355	439	IVV_T060117_B9_C22	57498	KIDINS220	NM_020738.1	238	299	class1	IR_653
4609	MYC	NM_002467	355	439	IVV_T060117_B9_C24	57498	KIDINS220	NM_020738.1	238	299	class1	IR_653
4609	MYC	NM_002467	355	439	IVV_T060117_B9_D06	57498	KIDINS220	NM_020738.1	238	299	class1	IR_653
4609	MYC	NM_002467	355	439	IVV_T060117_B9_D11	57498	KIDINS220	NM_020738.1	238	299	class1	IR_653
4609	MYC	NM_002467	355	439	IVV_T060117_B9_D15	57498	KIDINS220	NM_020738.1	238	299	class1	IR_653
4609	MYC	NM_002467	355	439	IVV_T060117_B9_D17	57498	KIDINS220	NM_020738.1	238	299	class1	IR_653
4609	MYC	NM_002467	355	439	IVV_T060117_B9_D20	57498	KIDINS220	NM_020738.1	238	299	class1	IR_653
4609	MYC	NM_002467	355	439	IVV_T060117_B9_E06	57498	KIDINS220	NM_020738.1	238	299	class1	IR_653
4609	MYC	NM_002467	355	439	IVV_T060117_B9_E07	57498	KIDINS220	NM_020738.1	238	299	class1	IR_653
4609	MYC	NM_002467	355	439	IVV_T060117_B9_E12	57498	KIDINS220	NM_020738.1	238	299	class1	IR_653
4609	MYC	NM_002467	355	439	IVV_T060117_B9_E14	57498	KIDINS220	NM_020738.1	238	299	class1	IR_653
4609	MYC	NM_002467	355	439	IVV_T060117_B9_E16	57498	KIDINS220	NM_020738.1	238	298	class1	IR_653
4609	MYC	NM_002467	355	439	IVV_T060117_B9_E22	57498	KIDINS220	NM_020738.1	238	299	class1	IR_653
4609	MYC	NM_002467	355	439	IVV_T060117_B9_E23	57498	KIDINS220	NM_020738.1	238	299	class1	IR_653
4609	MYC	NM_002467	355	439	IVV_T060117_B9_E24	57498	KIDINS220	NM_020738.1	238	299	class1	IR_653
4609	MYC	NM_002467	355	439	IVV_T060117_B9_F03	57498	KIDINS220	NM_020738.1	240	275	class1	IR_653
4609	MYC	NM_002467	355	439	IVV_T060117_B9_F10	57498	KIDINS220	NM_020738.1	238	299	class1	IR_653
4609	MYC	NM_002467	355	439	IVV_T060117_B9_F12	57498	KIDINS220	NM_020738.1	238	299	class1	IR_653
4609	MYC	NM_002467	355	439	IVV_T060117_B9_F22	57498	KIDINS220	NM_020738.1	238	299	class1	IR_653
4609	MYC	NM_002467	355	439	IVV_T060117_B9_F23	57498	KIDINS220	NM_020738.1	238	299	class1	IR_653
4609	MYC	NM_002467	355	439	IVV_T060117_B9_F24	57498	KIDINS220	NM_020738.1	238	299	class1	IR_653
4609	MYC	NM_002467	355	439	IVV_T060117_B9_G06	57498	KIDINS220	NM_020738.1	238	299	class1	IR_653
4609	MYC	NM_002467	355	439	IVV_T060117_B9_G07	57498	KIDINS220	NM_020738.1	238	299	class1	IR_653
4609	MYC	NM_002467	355	439	IVV_T060117_B9_G08	57498	KIDINS220	NM_020738.1	238	299	class1	IR_653
4609	MYC	NM_002467	355	439	IVV_T060117_B9_G14	57498	KIDINS220	NM_020738.1	238	299	class1	IR_653
4609	MYC	NM_002467	355	439	IVV_T060117_B9_G17	57498	KIDINS220	NM_020738.1	240	299	class1	IR_653
4609	MYC	NM_002467	355	439	IVV_T060117_B9_G21	57498	KIDINS220	NM_020738.1	238	299	class1	IR_653
4609	MYC	NM_002467	355	439	IVV_T060117_B9_O02	57498	KIDINS220	NM_020738.1	238	297	class1	IR_653
4609	MYC	NM_002467	355	439	IVV_T060117_B9_G23	57498	KIDINS220	NM_020738.1	238	299	class1	IR_653
4609	MYC	NM_002467	355	439	IVV_T060117_B9_G24	57498	KIDINS220	NM_020738.1	240	299	class1	IR_653
4609	MYC	NM_002467	355	439	IVV_T060117_B9_H06	57498	KIDINS220	NM_020738.1	238	299	class1	IR_653
4609	MYC	NM_002467	355	439	IVV_T060117_B9_H09	57498	KIDINS220	NM_020738.1	238	299	class1	IR_653
4609	MYC	NM_002467	355	439	IVV_T060117_B9_H11	57498	KIDINS220	NM_020738.1	238	299	class1	IR_653
4609	MYC	NM_002467	355	439	IVV_T060117_B9_H12	57498	KIDINS220	NM_020738.1	238	299	class1	IR_653
4609	MYC	NM_002467	355	439	IVV_T060117_B9_H21	57498	KIDINS220	NM_020738.1	242	299	class1	IR_653
4609	MYC	NM_002467	355	439	IVV_T060117_B9_I01	57498	KIDINS220	NM_020738.1	239	299	class1	IR_653
4609	MYC	NM_002467	355	439	IVV_T060117_B9_I02	57498	KIDINS220	NM_020738.1	238	299	class1	IR_653
4609	MYC	NM_002467	355	439	IVV_T060117_B9_I07	57498	KIDINS220	NM_020738.1	238	299	class1	IR_653
4609	MYC	NM_002467	355	439	IVV_T060117_B9_I10	57498	KIDINS220	NM_020738.1	238	299	class1	IR_653
4609	MYC	NM_002467	355	439	IVV_T060117_B9_I13	57498	KIDINS220	NM_020738.1	238	299	class1	IR_653
4609	MYC	NM_002467	355	439	IVV_T060117_B9_I20	57498	KIDINS220	NM_020738.1	238	299	class1	IR_653
4609	MYC	NM_002467	355	439	IVV_T060117_B9_I21	57498	KIDINS220	NM_020738.1	238	299	class1	IR_653
4609	MYC	NM_002467	355	439	IVV_T060117_B9_J04	57498	KIDINS220	NM_020738.1	238	299	class1	IR_653
4609	MYC	NM_002467	355	439	IVV_T060117_B9_J06	57498	KIDINS220	NM_020738.1	238	299	class1	IR_653
4609	MYC	NM_002467	355	439	IVV_T060117_B9_J09	57498	KIDINS220	NM_020738.1	238	299	class1	IR_653
4609	MYC	NM_002467	355	439	IVV_T060117_B9_J11	57498	KIDINS220	NM_020738.1	238	299	class1	IR_653
4609	MYC	NM_002467	355	439	IVV_T060117_B9_J12	57498	KIDINS220	NM_020738.1	238	299	class1	IR_653
4609	MYC	NM_002467	355	439	IVV_T060117_B9_J16	57498	KIDINS220	NM_020738.1	238	299	class1	IR_653
4609	MYC	NM_002467	355	439	IVV_T060117_B9_J18	57498	KIDINS220	NM_020738.1	238	299	class1	IR_653
4609	MYC	NM_002467	355	439	IVV_T060117_B9_J21	57498	KIDINS220	NM_020738.1	238	299	class1	IR_653
4609	MYC	NM_002467	355	439	IVV_T060117_B9_K06	57498	KIDINS220	NM_020738.1	238	299	class1	IR_653
4609	MYC	NM_002467	355	439	IVV_T060117_B9_K08	57498	KIDINS220	NM_020738.1	238	299	class1	IR_653
4609	MYC	NM_002467	355	439	IVV_T060117_B9_K09	57498	KIDINS220	NM_020738.1	238	299	class1	IR_653
4609	MYC	NM_002467	355	439	IVV_T060117_B9_K19	57498	KIDINS220	NM_020738.1	238	299	class1	IR_653
4609	MYC	NM_002467	355	439	IVV_T060117_B9_K20	57498	KIDINS220	NM_020738.1	238	299	class1	IR_653
4609	MYC	NM_002467	355	439	IVV_T060117_B9_K23	57498	KIDINS220	NM_020738.1	252	313	class1	IR_653
4609	MYC	NM_002467	355	439	IVV_T060117_B9_L11	57498	KIDINS220	NM_020738.1	238	299	class1	IR_653
4609	MYC	NM_002467	355	439	IVV_T060117_B9_L12	57498	KIDINS220	NM_020738.1	238	299	class1	IR_653
4609	MYC	NM_002467	355	439	IVV_T060117_B9_L16	57498	KIDINS220	NM_020738.1	238	299	class1	IR_653
4609	MYC	NM_002467	355	439	IVV_T060117_B9_L17	57498	KIDINS220	NM_020738.1	238	299	class1	IR_653
4609	MYC	NM_002467	355	439	IVV_T060117_B9_L19	57498	KIDINS220	NM_020738.1	238	299	class1	IR_653
4609	MYC	NM_002467	355	439	IVV_T060117_B9_L22	57498	KIDINS220	NM_020738.1	238	299	class1	IR_653
4609	MYC	NM_002467	355	439	IVV_T060117_B9_M04	57498	KIDINS220	NM_020738.1	238	299	class1	IR_653
4609	MYC	NM_002467	355	439	IVV_T060117_B9_M05	57498	KIDINS220	NM_020738.1	238	299	class1	IR_653
4609	MYC	NM_002467	355	439	IVV_T060117_B9_M09	57498	KIDINS220	NM_020738.1	238	299	class1	IR_653
4609	MYC	NM_002467	355	439	IVV_T060117_B9_M10	57498	KIDINS220	NM_020738.1	238	299	class1	IR_653
4609	MYC	NM_002467	355	439	IVV_T060117_B9_M11	57498	KIDINS220	NM_020738.1	238	299	class1	IR_653
4609	MYC	NM_002467	355	439	IVV_T060117_B9_M12	57498	KIDINS220	NM_020738.1	238	299	class1	IR_653
4609	MYC	NM_002467	355	439	IVV_T060117_B9_M20	57498	KIDINS220	NM_020738.1	238	299	class1	IR_653
4609	MYC	NM_002467	355	439	IVV_T060117_B9_M23	57498	KIDINS220	NM_020738.1	238	299	class1	IR_653
4609	MYC	NM_002467	355	439	IVV_T060117_B9_N03	57498	KIDINS220	NM_020738.1	238	299	class1	IR_653
4609	MYC	NM_002467	355	439	IVV_T060117_B9_N04	57498	KIDINS220	NM_020738.1	238	299	class1	IR_653
4609	MYC	NM_002467	355	439	IVV_T060117_B9_N05	57498	KIDINS220	NM_020738.1	238	299	class1	IR_653
4609	MYC	NM_002467	355	439	IVV_T060117_B9_N07	57498	KIDINS220	NM_020738.1	238	299	class1	IR_653
4609	MYC	NM_002467	355	439	IVV_T060117_B9_N10	57498	KIDINS220	NM_020738.1	238	299	class1	IR_653
4609	MYC	NM_002467	355	439	IVV_T060117_B9_N15	57498	KIDINS220	NM_020738.1	238	300	class1	IR_653
4609	MYC	NM_002467	355	439	IVV_T060117_B9_N21	57498	KIDINS220	NM_020738.1	238	299	class1	IR_653
4609	MYC	NM_002467	355	439	IVV_T060117_B9_O05	57498	KIDINS220	NM_020738.1	238	299	class1	IR_653
4609	MYC	NM_002467	355	439	IVV_T060117_B9_O06	57498	KIDINS220	NM_020738.1	252	313	class1	IR_653
4609	MYC	NM_002467	355	439	IVV_T060117_B9_O09	57498	KIDINS220	NM_020738.1	238	299	class1	IR_653
4609	MYC	NM_002467	355	439	IVV_T060117_B9_O10	57498	KIDINS220	NM_020738.1	238	299	class1	IR_653
4609	MYC	NM_002467	355	439	IVV_T060117_B9_O15	57498	KIDINS220	NM_020738.1	252	313	class1	IR_653
4609	MYC	NM_002467	355	439	IVV_T060407_B09_A02	57498	KIDINS220	NM_020738.1	238	299	class1	IR_653
4609	MYC	NM_002467	355	439	IVV_T060117_B9_P04	57498	KIDINS220	NM_020738.1	238	299	class1	IR_653
4609	MYC	NM_002467	355	439	IVV_T060117_B9_P08	57498	KIDINS220	NM_020738.1	239	299	class1	IR_653
4609	MYC	NM_002467	355	439	IVV_T060117_B9_P09	57498	KIDINS220	NM_020738.1	238	299	class1	IR_653
4609	MYC	NM_002467	355	439	IVV_T060407_B09_A09	57498	KIDINS220	NM_020738.1	238	299	class1	IR_653
4609	MYC	NM_002467	355	439	IVV_T060117_B9_P13	57498	KIDINS220	NM_020738.1	238	299	class1	IR_653
4609	MYC	NM_002467	355	439	IVV_T060117_B9_P15	57498	KIDINS220	NM_020738.1	238	299	class1	IR_653
4609	MYC	NM_002467	355	439	IVV_T060117_B9_P16	57498	KIDINS220	NM_020738.1	238	299	class1	IR_653
4609	MYC	NM_002467	355	439	IVV_T060117_B9_P19	57498	KIDINS220	NM_020738.1	238	299	class1	IR_653
4609	MYC	NM_002467	355	439	IVV_T060117_B9_P21	57498	KIDINS220	NM_020738.1	238	299	class1	IR_653
4609	MYC	NM_002467	355	439	IVV_T060407_B09_B04	57498	KIDINS220	NM_020738.1	238	299	class1	IR_653
4609	MYC	NM_002467	355	439	IVV_T060117_B9_P24	57498	KIDINS220	NM_020738.1	238	299	class1	IR_653
4609	MYC	NM_002467	355	439	IVV_T060407_B09_B21	57498	KIDINS220	NM_020738.1	246	290	class1	IR_653
4609	MYC	NM_002467	355	439	IVV_T060407_B09_C01	57498	KIDINS220	NM_020738.1	238	293	class1	IR_653
4609	MYC	NM_002467	355	439	IVV_T060407_B09_C02	57498	KIDINS220	NM_020738.1	238	298	class1	IR_653
4609	MYC	NM_002467	355	439	IVV_T060407_B09_D23	57498	KIDINS220	NM_020738.1	240	299	class1	IR_653
4609	MYC	NM_002467	355	439	IVV_T060407_B09_A03	57498	KIDINS220	NM_020738.1	238	299	class1	IR_653
4609	MYC	NM_002467	355	439	IVV_T060407_B09_A04	57498	KIDINS220	NM_020738.1	238	299	class1	IR_653
4609	MYC	NM_002467	355	439	IVV_T060407_B09_A06	57498	KIDINS220	NM_020738.1	238	299	class1	IR_653
4609	MYC	NM_002467	355	439	IVV_T060407_B09_A14	57498	KIDINS220	NM_020738.1	238	299	class1	IR_653
4609	MYC	NM_002467	355	439	IVV_T060407_B09_A15	57498	KIDINS220	NM_020738.1	238	299	class1	IR_653
4609	MYC	NM_002467	355	439	IVV_T060407_B09_A22	57498	KIDINS220	NM_020738.1	238	299	class1	IR_653
4609	MYC	NM_002467	355	439	IVV_T060407_B09_A23	57498	KIDINS220	NM_020738.1	238	299	class1	IR_653
4609	MYC	NM_002467	355	439	IVV_T060407_B09_B02	57498	KIDINS220	NM_020738.1	238	299	class1	IR_653
4609	MYC	NM_002467	355	439	IVV_T060407_B09_B05	57498	KIDINS220	NM_020738.1	238	299	class1	IR_653
4609	MYC	NM_002467	355	439	IVV_T060407_B09_B06	57498	KIDINS220	NM_020738.1	238	299	class1	IR_653
4609	MYC	NM_002467	355	439	IVV_T060407_B09_B07	57498	KIDINS220	NM_020738.1	238	299	class1	IR_653
4609	MYC	NM_002467	355	439	IVV_T060407_B09_B08	57498	KIDINS220	NM_020738.1	238	299	class1	IR_653
4609	MYC	NM_002467	355	439	IVV_T060407_B09_B14	57498	KIDINS220	NM_020738.1	238	299	class1	IR_653
4609	MYC	NM_002467	355	439	IVV_T060407_B09_B17	57498	KIDINS220	NM_020738.1	238	299	class1	IR_653
4609	MYC	NM_002467	355	439	IVV_T060407_B09_B23	57498	KIDINS220	NM_020738.1	238	299	class1	IR_653
4609	MYC	NM_002467	355	439	IVV_T060407_B09_B24	57498	KIDINS220	NM_020738.1	238	298	class1	IR_653
4609	MYC	NM_002467	355	439	IVV_T060407_B09_C09	57498	KIDINS220	NM_020738.1	238	299	class1	IR_653
4609	MYC	NM_002467	355	439	IVV_T060407_B09_C11	57498	KIDINS220	NM_020738.1	238	299	class1	IR_653
4609	MYC	NM_002467	355	439	IVV_T060407_B09_C16	57498	KIDINS220	NM_020738.1	238	299	class1	IR_653
4609	MYC	NM_002467	355	439	IVV_T060407_B09_C22	57498	KIDINS220	NM_020738.1	238	299	class1	IR_653
4609	MYC	NM_002467	355	439	IVV_T060407_B09_D03	57498	KIDINS220	NM_020738.1	238	299	class1	IR_653
4609	MYC	NM_002467	355	439	IVV_T060407_B09_D07	57498	KIDINS220	NM_020738.1	238	299	class1	IR_653
4609	MYC	NM_002467	355	439	IVV_T060407_B09_D10	57498	KIDINS220	NM_020738.1	238	299	class1	IR_653
4609	MYC	NM_002467	355	439	IVV_T060407_B09_D13	57498	KIDINS220	NM_020738.1	238	299	class1	IR_653
4609	MYC	NM_002467	355	439	IVV_T060407_B09_D14	57498	KIDINS220	NM_020738.1	238	299	class1	IR_653
4609	MYC	NM_002467	355	439	IVV_T060407_B09_I15	57498	KIDINS220	NM_020738.1	238	299	class1	IR_653
4609	MYC	NM_002467	355	439	IVV_T060407_B09_I17	57498	KIDINS220	NM_020738.1	238	299	class1	IR_653
4609	MYC	NM_002467	355	439	IVV_T060407_B09_D21	57498	KIDINS220	NM_020738.1	238	299	class1	IR_653
4609	MYC	NM_002467	355	439	IVV_T060407_B09_E06	57498	KIDINS220	NM_020738.1	238	299	class1	IR_653
4609	MYC	NM_002467	355	439	IVV_T060407_B09_E08	57498	KIDINS220	NM_020738.1	238	299	class1	IR_653
4609	MYC	NM_002467	355	439	IVV_T060407_B09_E11	57498	KIDINS220	NM_020738.1	238	298	class1	IR_653
4609	MYC	NM_002467	355	439	IVV_T060407_B09_E12	57498	KIDINS220	NM_020738.1	238	299	class1	IR_653
4609	MYC	NM_002467	355	439	IVV_T060407_B09_F01	57498	KIDINS220	NM_020738.1	240	299	class1	IR_653
4609	MYC	NM_002467	355	439	IVV_T060407_B09_F05	57498	KIDINS220	NM_020738.1	238	299	class1	IR_653
4609	MYC	NM_002467	355	439	IVV_T060407_B09_F06	57498	KIDINS220	NM_020738.1	238	299	class1	IR_653
4609	MYC	NM_002467	355	439	IVV_T060407_B09_F08	57498	KIDINS220	NM_020738.1	238	299	class1	IR_653
4609	MYC	NM_002467	355	439	IVV_T060407_B09_K12	57498	KIDINS220	NM_020738.1	238	299	class1	IR_653
4609	MYC	NM_002467	355	439	IVV_T060407_B09_F13	57498	KIDINS220	NM_020738.1	238	299	class1	IR_653
4609	MYC	NM_002467	355	439	IVV_T060407_B09_F17	57498	KIDINS220	NM_020738.1	238	299	class1	IR_653
4609	MYC	NM_002467	355	439	IVV_T060407_B09_F21	57498	KIDINS220	NM_020738.1	238	299	class1	IR_653
4609	MYC	NM_002467	355	439	IVV_T060407_B09_K22	57498	KIDINS220	NM_020738.1	269	299	class1	IR_653
4609	MYC	NM_002467	355	439	IVV_T060407_B09_G01	57498	KIDINS220	NM_020738.1	238	299	class1	IR_653
4609	MYC	NM_002467	355	439	IVV_T060407_B09_G04	57498	KIDINS220	NM_020738.1	238	299	class1	IR_653
4609	MYC	NM_002467	355	439	IVV_T060407_B09_G05	57498	KIDINS220	NM_020738.1	238	299	class1	IR_653
4609	MYC	NM_002467	355	439	IVV_T060407_B09_G06	57498	KIDINS220	NM_020738.1	238	299	class1	IR_653
4609	MYC	NM_002467	355	439	IVV_T060407_B09_G09	57498	KIDINS220	NM_020738.1	238	299	class1	IR_653
4609	MYC	NM_002467	355	439	IVV_T060407_B09_G15	57498	KIDINS220	NM_020738.1	238	299	class1	IR_653
4609	MYC	NM_002467	355	439	IVV_T060407_B09_G24	57498	KIDINS220	NM_020738.1	238	296	class1	IR_653
4609	MYC	NM_002467	355	439	IVV_T060407_B09_H01	57498	KIDINS220	NM_020738.1	238	299	class1	IR_653
4609	MYC	NM_002467	355	439	IVV_T060407_B09_H04	57498	KIDINS220	NM_020738.1	238	299	class1	IR_653
4609	MYC	NM_002467	355	439	IVV_T060407_B09_H05	57498	KIDINS220	NM_020738.1	238	299	class1	IR_653
4609	MYC	NM_002467	355	439	IVV_T060407_B09_H07	57498	KIDINS220	NM_020738.1	238	299	class1	IR_653
4609	MYC	NM_002467	355	439	IVV_T060407_B09_H11	57498	KIDINS220	NM_020738.1	238	299	class1	IR_653
4609	MYC	NM_002467	355	439	IVV_T060407_B09_H14	57498	KIDINS220	NM_020738.1	238	299	class1	IR_653
4609	MYC	NM_002467	355	439	IVV_T060407_B09_I01	57498	KIDINS220	NM_020738.1	238	299	class1	IR_653
4609	MYC	NM_002467	355	439	IVV_T060407_B09_I03	57498	KIDINS220	NM_020738.1	254	300	class1	IR_653
4609	MYC	NM_002467	355	439	IVV_T060407_B09_I04	57498	KIDINS220	NM_020738.1	238	299	class1	IR_653
4609	MYC	NM_002467	355	439	IVV_T060407_B09_I07	57498	KIDINS220	NM_020738.1	238	299	class1	IR_653
4609	MYC	NM_002467	355	439	IVV_T060407_B09_I08	57498	KIDINS220	NM_020738.1	238	299	class1	IR_653
4609	MYC	NM_002467	355	439	IVV_T060407_B09_J01	57498	KIDINS220	NM_020738.1	238	299	class1	IR_653
4609	MYC	NM_002467	355	439	IVV_T060407_B09_J03	57498	KIDINS220	NM_020738.1	238	299	class1	IR_653
4609	MYC	NM_002467	355	439	IVV_T060407_B09_J04	57498	KIDINS220	NM_020738.1	238	299	class1	IR_653
4609	MYC	NM_002467	355	439	IVV_T060407_B09_J12	57498	KIDINS220	NM_020738.1	238	299	class1	IR_653
4609	MYC	NM_002467	355	439	IVV_T060407_B09_J14	57498	KIDINS220	NM_020738.1	238	299	class1	IR_653
4609	MYC	NM_002467	355	439	IVV_T060407_B09_J16	57498	KIDINS220	NM_020738.1	238	299	class1	IR_653
4609	MYC	NM_002467	355	439	IVV_T060407_B09_K01	57498	KIDINS220	NM_020738.1	238	299	class1	IR_653
4609	MYC	NM_002467	355	439	IVV_T060407_B09_K04	57498	KIDINS220	NM_020738.1	238	299	class1	IR_653
4609	MYC	NM_002467	355	439	IVV_T060407_B09_K06	57498	KIDINS220	NM_020738.1	238	299	class1	IR_653
4609	MYC	NM_002467	355	439	IVV_T060407_B09_K13	57498	KIDINS220	NM_020738.1	238	299	class1	IR_653
4609	MYC	NM_002467	355	439	IVV_T060407_B09_K15	57498	KIDINS220	NM_020738.1	238	299	class1	IR_653
4609	MYC	NM_002467	355	439	IVV_T060407_B09_K18	57498	KIDINS220	NM_020738.1	238	299	class1	IR_653
4609	MYC	NM_002467	355	439	IVV_T060407_B09_L01	57498	KIDINS220	NM_020738.1	238	299	class1	IR_653
4609	MYC	NM_002467	355	439	IVV_T060407_B09_L02	57498	KIDINS220	NM_020738.1	238	299	class1	IR_653
4609	MYC	NM_002467	355	439	IVV_T060407_B09_P06	57498	KIDINS220	NM_020738.1	238	299	class1	IR_653
4609	MYC	NM_002467	355	439	IVV_T060407_B09_L04	57498	KIDINS220	NM_020738.1	238	299	class1	IR_653
4609	MYC	NM_002467	355	439	IVV_T060407_B09_L05	57498	KIDINS220	NM_020738.1	238	299	class1	IR_653
4609	MYC	NM_002467	355	439	IVV_T060407_B09_L06	57498	KIDINS220	NM_020738.1	238	299	class1	IR_653
4609	MYC	NM_002467	355	439	IVV_T060407_B09_L11	57498	KIDINS220	NM_020738.1	238	299	class1	IR_653
4609	MYC	NM_002467	355	439	IVV_T060407_B09_L13	57498	KIDINS220	NM_020738.1	238	299	class1	IR_653
4609	MYC	NM_002467	355	439	IVV_T060407_B09_L16	57498	KIDINS220	NM_020738.1	238	299	class1	IR_653
4609	MYC	NM_002467	355	439	IVV_T060407_B09_L23	57498	KIDINS220	NM_020738.1	238	299	class1	IR_653
4609	MYC	NM_002467	355	439	IVV_T060407_B09_M01	57498	KIDINS220	NM_020738.1	238	299	class1	IR_653
4609	MYC	NM_002467	355	439	IVV_T060407_B09_M04	57498	KIDINS220	NM_020738.1	238	299	class1	IR_653
4609	MYC	NM_002467	355	439	IVV_T060407_B09_M05	57498	KIDINS220	NM_020738.1	238	299	class1	IR_653
4609	MYC	NM_002467	355	439	IVV_T060407_B09_M07	57498	KIDINS220	NM_020738.1	238	313	class1	IR_653
4609	MYC	NM_002467	355	439	IVV_T060407_B09_M09	57498	KIDINS220	NM_020738.1	238	299	class1	IR_653
4609	MYC	NM_002467	355	439	IVV_T060407_B09_M14	57498	KIDINS220	NM_020738.1	253	299	class1	IR_653
4609	MYC	NM_002467	355	439	IVV_T060407_B09_N01	57498	KIDINS220	NM_020738.1	238	299	class1	IR_653
4609	MYC	NM_002467	355	439	IVV_T060407_B09_N03	57498	KIDINS220	NM_020738.1	238	299	class1	IR_653
4609	MYC	NM_002467	355	439	IVV_T060407_B09_N06	57498	KIDINS220	NM_020738.1	238	300	class1	IR_653
4609	MYC	NM_002467	355	439	IVV_T060407_B09_N11	57498	KIDINS220	NM_020738.1	239	299	class1	IR_653
4609	MYC	NM_002467	355	439	IVV_T060407_B09_N12	57498	KIDINS220	NM_020738.1	238	299	class1	IR_653
4609	MYC	NM_002467	355	439	IVV_T060407_B09_N13	57498	KIDINS220	NM_020738.1	238	299	class1	IR_653
4609	MYC	NM_002467	355	439	IVV_T060407_B09_N14	57498	KIDINS220	NM_020738.1	238	299	class1	IR_653
4609	MYC	NM_002467	355	439	IVV_T060407_B09_N16	57498	KIDINS220	NM_020738.1	238	299	class1	IR_653
4609	MYC	NM_002467	355	439	IVV_T060407_B09_N17	57498	KIDINS220	NM_020738.1	238	299	class1	IR_653
4609	MYC	NM_002467	355	439	IVV_T060407_B09_N24	57498	KIDINS220	NM_020738.1	238	299	class1	IR_653
4609	MYC	NM_002467	355	439	IVV_T060407_B09_O05	57498	KIDINS220	NM_020738.1	238	299	class1	IR_653
4609	MYC	NM_002467	355	439	IVV_T060407_B09_O07	57498	KIDINS220	NM_020738.1	239	299	class1	IR_653
4609	MYC	NM_002467	355	439	IVV_T060407_B09_O12	57498	KIDINS220	NM_020738.1	252	313	class1	IR_653
4609	MYC	NM_002467	355	439	IVV_T060407_B09_O17	57498	KIDINS220	NM_020738.1	238	299	class1	IR_653
4609	MYC	NM_002467	355	439	IVV_T060407_B09_O21	57498	KIDINS220	NM_020738.1	238	299	class1	IR_653
4609	MYC	NM_002467	355	439	IVV_T060407_B09_O23	57498	KIDINS220	NM_020738.1	238	299	class1	IR_653
4609	MYC	NM_002467	355	439	IVV_T060407_B09_P02	57498	KIDINS220	NM_020738.1	238	299	class1	IR_653
4609	MYC	NM_002467	355	439	IVV_T060407_B09_P11	57498	KIDINS220	NM_020738.1	238	299	class1	IR_653
4609	MYC	NM_002467	355	439	IVV_T060407_B09_P13	57498	KIDINS220	NM_020738.1	238	299	class1	IR_653
4609	MYC	NM_002467	355	439	IVV_T060407_B09_P15	57498	KIDINS220	NM_020738.1	238	299	class1	IR_653
4609	MYC	NM_002467	355	439	IVV_T060407_B09_P16	57498	KIDINS220	NM_020738.1	238	299	class1	IR_653
4609	MYC	NM_002467	355	439	IVV_T060407_B09_P20	57498	KIDINS220	NM_020738.1	239	299	class1	IR_653
4609	MYC	NM_002467	355	439	IVV_T060407_B09_P23	57498	KIDINS220	NM_020738.1	253	300	class1	IR_653
4609	MYC	NM_002467	355	439	IVV_T051018_B9_B09	23641	LDOC1	NM_012317.2	116	134	class1	IR_656
4609	MYC	NM_002467	355	439	IVV_T051018_B9_J21	23641	LDOC1	NM_012317.2	116	134	class1	IR_656
4609	MYC	NM_002467	355	439	IVV_T060117_B9_H17	23641	LDOC1	NM_012317.2	116	134	class1	IR_656
4609	MYC	NM_002467	355	439	IVV_T060407_B09_P09	23641	LDOC1	NM_012317.2	116	134	class1	IR_656
4609	MYC	NM_002467	355	439	IVV_T060407_B09_P12	23641	LDOC1	NM_012317.2	116	134	class1	IR_656
4609	MYC	NM_002467	355	439	IVV_T060117_B9_B14	6625	SNRP70	NM_001009820.1	46	84	class1	IR_776
4609	MYC	NM_002467	355	439	IVV_T060117_B9_P11	6625	SNRP70	NM_001009820.1	46	83	class1	IR_776
4609	MYC	NM_002467	355	439	IVV_T060407_B09_B15	6625	SNRP70	NM_001009820.1	46	84	class1	IR_776
4609	MYC	NM_002467	355	439	IVV_T060407_B09_L07	6625	SNRP70	NM_001009820.1	46	73	class1	IR_776
4609	MYC	NM_002467	1	454	IVV_S20060609_5TH_H1_01_H03	8019	BRD3	NM_007371.2	648	687	class2	IR_377
4609	MYC	NM_002467	1	454	IVV_S20060609_5TH_H1_02_F05	6319	SCD	NM_005063.4	186	197	class2	IR_378
4609	MYC	NM_002467	1	454	IVV_S20060609_5TH_H1_02_H05	9201	DCAMKL1	NM_004734.2	385	399	class2	IR_379
4609	MYC	NM_002467	1	454	IVV_S20060609_5TH_H1_03_D11	3066	HDAC2	NM_001527.2	522	558	class2	IR_380
4609	MYC	NM_002467	1	454	IVV_S20060609_5TH_H1_04_A03	7158	TP53BP1	NM_005657.1	660	677	class2	IR_381
4609	MYC	NM_002467	1	454	IVV_S20060609_5TH_H1_04_F05	7150	TOP1	NM_003286.2	65	93	class2	IR_382
4609	MYC	NM_002467	355	439	IVV_T051018_B9_A19	9113	LATS1	NM_004690.2	596	606	class2	IR_654
4609	MYC	NM_002467	355	439	IVV_T051018_B9_A24	2747	GLUD2	NM_012084.3	433	443	class2	IR_655
4609	MYC	NM_002467	355	439	IVV_T051018_B9_C03	26058	TNRC15	NM_015575.2	354	363	class2	IR_657
4609	MYC	NM_002467	355	439	IVV_T051018_B9_F07	9702	CEP57	NM_014679.3	76	116	class2	IR_658
4609	MYC	NM_002467	355	439	IVV_T051018_B9_F11	10580	SORBS1	NM_001034954.1	612	623	class2	IR_659
4609	MYC	NM_002467	355	439	IVV_T051018_B9_L14	3382	ICA1	NM_004968.2	14	31	class2	IR_660
4609	MYC	NM_002467	355	439	IVV_T060117_B9_B03	7343	UBTF	NM_001076683.1	682	692	class2	IR_775
4609	MYC	NM_002467	355	439	IVV_T060117_B9_F20	23645	PPP1R15A	NM_014330.2	310	322	class2	IR_777
4609	MYC	NM_002467	355	439	IVV_T060117_B9_N16	6418	SET	NM_003011.1	230	243	class2	IR_778
4609	MYC	NM_002467	1	454	IVV_T060117_H1_F16	4673	NAP1L1	NM_139207.1	127	157	class2	IR_903
4609	MYC	NM_002467	1	454	IVV_T060117_H1_J15	10090	UST	NM_005715.1	384	400	class2	IR_904
4609	MYC	NM_002467	1	454	IVV_T060117_H1_L02	51088	KLHL5	NM_015990.3	719	744	class2	IR_905
4609	MYC	NM_002467	1	454	IVV_T060117_H1_P08	5504	PPP1R2	NM_006241.3	167	181	class2	IR_906
4692	NDN	NM_002487	1	321	IVV_T060117_G3_A05	51678	MPP6	NM_016447.2	8	21	class1	IR_881
4692	NDN	NM_002487	1	321	IVV_T060117_G3_A09	51678	MPP6	NM_016447.2	8	21	class1	IR_881
4692	NDN	NM_002487	1	321	IVV_T060117_G3_A15	51678	MPP6	NM_016447.2	8	21	class1	IR_881
4692	NDN	NM_002487	1	321	IVV_T060117_G3_A18	51678	MPP6	NM_016447.2	10	21	class1	IR_881
4692	NDN	NM_002487	1	321	IVV_T060117_G3_B01	51678	MPP6	NM_016447.2	8	21	class1	IR_881
4692	NDN	NM_002487	1	321	IVV_T060117_G3_B02	51678	MPP6	NM_016447.2	8	21	class1	IR_881
4692	NDN	NM_002487	1	321	IVV_T060117_G3_B08	51678	MPP6	NM_016447.2	8	21	class1	IR_881
4692	NDN	NM_002487	1	321	IVV_T060117_G3_B11	51678	MPP6	NM_016447.2	8	21	class1	IR_881
4692	NDN	NM_002487	1	321	IVV_T060117_G3_B14	51678	MPP6	NM_016447.2	8	21	class1	IR_881
4692	NDN	NM_002487	1	321	IVV_T060117_G3_C06	51678	MPP6	NM_016447.2	8	21	class1	IR_881
4692	NDN	NM_002487	1	321	IVV_T060117_G3_C08	51678	MPP6	NM_016447.2	8	21	class1	IR_881
4692	NDN	NM_002487	1	321	IVV_T060117_G3_C10	51678	MPP6	NM_016447.2	8	21	class1	IR_881
4692	NDN	NM_002487	1	321	IVV_T060117_G3_C12	51678	MPP6	NM_016447.2	8	21	class1	IR_881
4692	NDN	NM_002487	1	321	IVV_T060117_G3_C15	51678	MPP6	NM_016447.2	8	21	class1	IR_881
4692	NDN	NM_002487	1	321	IVV_T060117_G3_C18	51678	MPP6	NM_016447.2	8	21	class1	IR_881
4692	NDN	NM_002487	1	321	IVV_T060117_G3_D01	51678	MPP6	NM_016447.2	8	21	class1	IR_881
4692	NDN	NM_002487	1	321	IVV_T060117_G3_D08	51678	MPP6	NM_016447.2	8	21	class1	IR_881
4692	NDN	NM_002487	1	321	IVV_T060117_G3_D11	51678	MPP6	NM_016447.2	8	21	class1	IR_881
4692	NDN	NM_002487	1	321	IVV_T060117_G3_D16	51678	MPP6	NM_016447.2	8	21	class1	IR_881
4692	NDN	NM_002487	1	321	IVV_T060117_G3_D17	51678	MPP6	NM_016447.2	8	21	class1	IR_881
4692	NDN	NM_002487	1	321	IVV_T060117_G3_E04	51678	MPP6	NM_016447.2	8	21	class1	IR_881
4692	NDN	NM_002487	1	321	IVV_T060117_G3_E08	51678	MPP6	NM_016447.2	8	21	class1	IR_881
4692	NDN	NM_002487	1	321	IVV_T060117_G3_E12	51678	MPP6	NM_016447.2	8	21	class1	IR_881
4692	NDN	NM_002487	1	321	IVV_T060117_G3_E13	51678	MPP6	NM_016447.2	8	21	class1	IR_881
4692	NDN	NM_002487	1	321	IVV_T060117_G3_F10	51678	MPP6	NM_016447.2	8	21	class1	IR_881
4692	NDN	NM_002487	1	321	IVV_T060117_G3_F12	51678	MPP6	NM_016447.2	8	21	class1	IR_881
4692	NDN	NM_002487	1	321	IVV_T060117_G3_F14	51678	MPP6	NM_016447.2	8	21	class1	IR_881
4692	NDN	NM_002487	1	321	IVV_T060117_G3_F20	51678	MPP6	NM_016447.2	8	21	class1	IR_881
4692	NDN	NM_002487	1	321	IVV_T060117_G3_F22	51678	MPP6	NM_016447.2	8	21	class1	IR_881
4692	NDN	NM_002487	1	321	IVV_T060117_G3_F23	51678	MPP6	NM_016447.2	8	21	class1	IR_881
4692	NDN	NM_002487	1	321	IVV_T060117_G3_G02	51678	MPP6	NM_016447.2	8	21	class1	IR_881
4692	NDN	NM_002487	1	321	IVV_T060117_G3_G03	51678	MPP6	NM_016447.2	8	21	class1	IR_881
4692	NDN	NM_002487	1	321	IVV_T060117_G3_G08	51678	MPP6	NM_016447.2	8	21	class1	IR_881
4692	NDN	NM_002487	1	321	IVV_T060117_G3_G18	51678	MPP6	NM_016447.2	8	21	class1	IR_881
4692	NDN	NM_002487	1	321	IVV_T060117_G3_G19	51678	MPP6	NM_016447.2	8	21	class1	IR_881
4692	NDN	NM_002487	1	321	IVV_T060117_G3_H01	51678	MPP6	NM_016447.2	8	21	class1	IR_881
4692	NDN	NM_002487	1	321	IVV_T060117_G3_H13	51678	MPP6	NM_016447.2	8	21	class1	IR_881
4692	NDN	NM_002487	1	321	IVV_T060117_G3_H16	51678	MPP6	NM_016447.2	8	21	class1	IR_881
4692	NDN	NM_002487	1	321	IVV_T060117_G3_I02	51678	MPP6	NM_016447.2	8	21	class1	IR_881
4692	NDN	NM_002487	1	321	IVV_T060117_G3_I05	51678	MPP6	NM_016447.2	8	21	class1	IR_881
4692	NDN	NM_002487	1	321	IVV_T060117_G3_I21	51678	MPP6	NM_016447.2	8	21	class1	IR_881
4692	NDN	NM_002487	1	321	IVV_T060117_G3_I24	51678	MPP6	NM_016447.2	8	21	class1	IR_881
4692	NDN	NM_002487	1	321	IVV_T060117_G3_J11	51678	MPP6	NM_016447.2	8	21	class1	IR_881
4692	NDN	NM_002487	1	321	IVV_T060117_G3_J13	51678	MPP6	NM_016447.2	8	21	class1	IR_881
4692	NDN	NM_002487	1	321	IVV_T060117_G3_J15	51678	MPP6	NM_016447.2	8	21	class1	IR_881
4692	NDN	NM_002487	1	321	IVV_T060117_G3_J18	51678	MPP6	NM_016447.2	8	21	class1	IR_881
4692	NDN	NM_002487	1	321	IVV_T060117_G3_J20	51678	MPP6	NM_016447.2	10	21	class1	IR_881
4692	NDN	NM_002487	1	321	IVV_T060117_G3_J24	51678	MPP6	NM_016447.2	8	21	class1	IR_881
4692	NDN	NM_002487	1	321	IVV_T060117_G3_K03	51678	MPP6	NM_016447.2	8	21	class1	IR_881
4692	NDN	NM_002487	1	321	IVV_T060117_G3_K04	51678	MPP6	NM_016447.2	8	21	class1	IR_881
4692	NDN	NM_002487	1	321	IVV_T060117_G3_K05	51678	MPP6	NM_016447.2	8	21	class1	IR_881
4692	NDN	NM_002487	1	321	IVV_T060117_G3_K11	51678	MPP6	NM_016447.2	8	21	class1	IR_881
4692	NDN	NM_002487	1	321	IVV_T060117_G3_K12	51678	MPP6	NM_016447.2	8	21	class1	IR_881
4692	NDN	NM_002487	1	321	IVV_T060117_G3_K15	51678	MPP6	NM_016447.2	8	21	class1	IR_881
4692	NDN	NM_002487	1	321	IVV_T060117_G3_K18	51678	MPP6	NM_016447.2	8	21	class1	IR_881
4692	NDN	NM_002487	1	321	IVV_T060117_G3_L01	51678	MPP6	NM_016447.2	8	21	class1	IR_881
4692	NDN	NM_002487	1	321	IVV_T060117_G3_L05	51678	MPP6	NM_016447.2	8	21	class1	IR_881
4692	NDN	NM_002487	1	321	IVV_T060117_G3_L09	51678	MPP6	NM_016447.2	8	21	class1	IR_881
4692	NDN	NM_002487	1	321	IVV_T060117_G3_L12	51678	MPP6	NM_016447.2	8	21	class1	IR_881
4692	NDN	NM_002487	1	321	IVV_T060117_G3_L16	51678	MPP6	NM_016447.2	8	21	class1	IR_881
4692	NDN	NM_002487	1	321	IVV_T060117_G3_M03	51678	MPP6	NM_016447.2	8	21	class1	IR_881
4692	NDN	NM_002487	1	321	IVV_T060117_G3_M09	51678	MPP6	NM_016447.2	8	21	class1	IR_881
4692	NDN	NM_002487	1	321	IVV_T060117_G3_M12	51678	MPP6	NM_016447.2	8	21	class1	IR_881
4692	NDN	NM_002487	1	321	IVV_T060117_G3_M17	51678	MPP6	NM_016447.2	8	21	class1	IR_881
4692	NDN	NM_002487	1	321	IVV_T060117_G3_M22	51678	MPP6	NM_016447.2	8	21	class1	IR_881
4692	NDN	NM_002487	1	321	IVV_T060117_G3_M24	51678	MPP6	NM_016447.2	8	21	class1	IR_881
4692	NDN	NM_002487	1	321	IVV_T060117_G3_N06	51678	MPP6	NM_016447.2	8	21	class1	IR_881
4692	NDN	NM_002487	1	321	IVV_T060117_G3_N13	51678	MPP6	NM_016447.2	8	21	class1	IR_881
4692	NDN	NM_002487	1	321	IVV_T060117_G3_N22	51678	MPP6	NM_016447.2	8	21	class1	IR_881
4692	NDN	NM_002487	1	321	IVV_T060117_G3_N23	51678	MPP6	NM_016447.2	8	21	class1	IR_881
4692	NDN	NM_002487	1	321	IVV_T060117_G3_O06	51678	MPP6	NM_016447.2	8	21	class1	IR_881
4692	NDN	NM_002487	1	321	IVV_T060117_G3_O07	51678	MPP6	NM_016447.2	8	21	class1	IR_881
4692	NDN	NM_002487	1	321	IVV_T060117_G3_O09	51678	MPP6	NM_016447.2	8	21	class1	IR_881
4692	NDN	NM_002487	1	321	IVV_T060117_G3_O14	51678	MPP6	NM_016447.2	8	21	class1	IR_881
4692	NDN	NM_002487	1	321	IVV_T060117_G3_O20	51678	MPP6	NM_016447.2	10	21	class1	IR_881
4692	NDN	NM_002487	1	321	IVV_T060117_G3_O21	51678	MPP6	NM_016447.2	8	21	class1	IR_881
4692	NDN	NM_002487	1	321	IVV_T060117_G3_P03	51678	MPP6	NM_016447.2	8	21	class1	IR_881
4692	NDN	NM_002487	1	321	IVV_T060117_G3_P14	51678	MPP6	NM_016447.2	8	21	class1	IR_881
4692	NDN	NM_002487	1	321	IVV_T060117_G3_P21	51678	MPP6	NM_016447.2	8	21	class1	IR_881
4692	NDN	NM_002487	1	321	IVV_T060117_G3_P22	51678	MPP6	NM_016447.2	8	21	class1	IR_881
4692	NDN	NM_002487	1	321	IVV_T060117_G3_P23	51678	MPP6	NM_016447.2	8	21	class1	IR_881
4692	NDN	NM_002487	1	321	IVV_S20060609_5TH_G3_01_E08	4691	NCL	NM_005381.2	230	251	class2	IR_363
4790	NFKB1	NM_003998	1	969	IVV_S20060609_5TH_F8_01_A04	51678	MPP6	NM_016447.2	8	21	class1	IR_348
4790	NFKB1	NM_003998	1	969	IVV_S20060609_5TH_F8_01_G06	51678	MPP6	NM_016447.2	8	21	class1	IR_348
4790	NFKB1	NM_003998	1	969	IVV_S20060609_5TH_F8_02_D10	51678	MPP6	NM_016447.2	8	21	class1	IR_348
4790	NFKB1	NM_003998	1	969	IVV_S20060609_5TH_F8_03_C01	51678	MPP6	NM_016447.2	8	21	class1	IR_348
4790	NFKB1	NM_003998	1	969	IVV_S20060609_5TH_F8_03_E01	51678	MPP6	NM_016447.2	8	21	class1	IR_348
4790	NFKB1	NM_003998	1	969	IVV_S20060609_5TH_F8_03_G09	51678	MPP6	NM_016447.2	8	21	class1	IR_348
4790	NFKB1	NM_003998	1	969	IVV_S20060609_5TH_F8_04_C03	51678	MPP6	NM_016447.2	8	21	class1	IR_348
4790	NFKB1	NM_003998	1	969	IVV_S20060609_5TH_F8_04_H02	51678	MPP6	NM_016447.2	8	21	class1	IR_348
4790	NFKB1	NM_003998	1	969	IVV_S20051122_F08_01_A05	522	ATP5J	NM_001003696.1	52	71	class2	IR_177
4790	NFKB1	NM_003998	1	969	IVV_S20051122_F08_02_B11	148423	C1orf52	NM_198077.1	151	173	class2	IR_178
4790	NFKB1	NM_003998	1	969	IVV_S20051122_F08_02_F08	152789	JAKMIP1	XM_001129178.1	347	359	class2	IR_179
4790	NFKB1	NM_003998	1	969	IVV_S20051122_F08_03_A12	3459	IFNGR1	NM_000416.1	429	442	class2	IR_180
4790	NFKB1	NM_003998	1	969	IVV_S20051122_F08_03_E02	65123	INTS3	NM_023015.3	515	533	class2	IR_181
4790	NFKB1	NM_003998	1	969	IVV_S20051122_F08_04_D08	2888	GRB14	NM_004490.2	494	506	class2	IR_182
4790	NFKB1	NM_003998	1	969	IVV_S20051122_F08_04_E03	9879	DDX46	NM_014829.2	117	172	class2	IR_183
4790	NFKB1	NM_003998	1	969	IVV_S20051122_F08_04_E11	6709	SPTAN1	NM_003127.1	156	167	class2	IR_184
4790	NFKB1	NM_003998	1	969	IVV_S20051122_F08_04_H01	667	DST	NM_183380.1	5372	5392	class2	IR_185
4790	NFKB1	NM_003998	11	400	IVV_S20060609_5TH_B10_01_G06	334	APLP2	NM_001642.1	218	230	class2	IR_219
4790	NFKB1	NM_003998	11	400	IVV_S20060609_5TH_B10_02_H09	5358	PLS3	NM_005032.3	51	70	class2	IR_220
4790	NFKB1	NM_003998	11	400	IVV_S20060609_5TH_B10_03_B05	51669	TMEM66	NM_016127.4	87	96	class2	IR_221
4790	NFKB1	NM_003998	11	400	IVV_S20060609_5TH_B10_03_C03	27183	VPS4A	NM_013245.2	7	18	class2	IR_222
4790	NFKB1	NM_003998	11	400	IVV_S20060609_5TH_B10_04_G03	6711	SPTBN1	NM_003128.2	2282	2292	class2	IR_223
4790	NFKB1	NM_003998	1	969	IVV_S20060609_5TH_F8_01_A01	2074	ERCC6	NM_000124.1	454	487	class2	IR_347
4790	NFKB1	NM_003998	1	969	IVV_S20060609_5TH_F8_03_G01	27043	PELP1	NM_014389.1	929	944	class2	IR_349
4790	NFKB1	NM_003998	11	400	IVV_S20051122_B10_02_A04	3148	HMGB2	NM_002129.2	193	204	class2	IR_73
4790	NFKB1	NM_003998	11	400	IVV_S20051122_B10_02_H10	23646	PLD3	NM_012268.1	375	388	class2	IR_74
4790	NFKB1	NM_003998	11	400	IVV_S20051122_B10_03_G09	23112	TNRC6B	NM_015088.1	21	44	class2	IR_75
2063	NR2F6	NM_005234	1	404	IVV_S20060609_5TH_A4_02_H11	10951	CBX1	NM_006807.3	3	18	class2	IR_216
2063	NR2F6	NM_005234	1	404	IVV_S20060609_5TH_A4_03_D12	54623	PAF1	NM_019088.2	380	405	class2	IR_217
2063	NR2F6	NM_005234	1	404	IVV_S20060609_5TH_A4_04_C06	26354	GNL3	NM_206825.1	452	472	class2	IR_218
2063	NR2F6	NM_005234	1	404	IVV_S20051122_A04_01_B02	521	ATP5I	NM_007100.2	35	49	class2	IR_41
2063	NR2F6	NM_005234	1	404	IVV_S20051122_A04_01_E05	27316	RBMX	NM_002139.2	268	279	class2	IR_42
2063	NR2F6	NM_005234	1	404	IVV_S20051122_A04_01_F06	4673	NAP1L1	NM_139207.1	347	357	class2	IR_43
2063	NR2F6	NM_005234	1	404	IVV_S20051122_A04_02_D09	9731	KIAA0562	NM_014704.2	669	690	class2	IR_44
2063	NR2F6	NM_005234	1	404	IVV_S20051122_A04_03_D01	51382	ATP6V1D	NM_015994.2	193	207	class2	IR_45
2063	NR2F6	NM_005234	1	404	IVV_S20051122_A04_03_F06	440498	LOC440498	XM_498704.3	45	58	class2	IR_46
2063	NR2F6	NM_005234	1	404	IVV_S20051122_A04_03_H05	815	CAMK2A	NM_015981.2	340	353	class2	IR_47
2063	NR2F6	NM_005234	1	404	IVV_S20051122_A04_04_C09	56255	TXNDC13	NM_021156.2	247	267	class2	IR_48
2063	NR2F6	NM_005234	1	404	IVV_S20051122_A04_04_F07	6144	RPL21	NM_000982.3	111	121	class2	IR_49
2063	NR2F6	NM_005234	1	404	IVV_S20051122_A04_04_G10	29994	BAZ2B	NM_013450.2	1291	1301	class2	IR_50
2908	NR3C1	NM_000176	1	777	IVV_S20051122_F03_01_F08	3320	HSP90AA1	NM_001017963.1	343	360	class1	IR_166
2908	NR3C1	NM_000176	1	777	IVV_S20060609_7TH_F3_02_B10	3320	HSP90AA1	NM_001017963.1	347	385	class1	IR_166
2908	NR3C1	NM_000176	1	777	IVV_S20060609_7TH_F3_04_B01	3320	HSP90AA1	NM_001017963.1	346	361	class1	IR_166
2908	NR3C1	NM_000176	77	262	IVV_S20051122_G09_02_H11	1059	CENPB	NM_001810.5	514	524	class1	IR_205
2908	NR3C1	NM_000176	77	262	IVV_S20060609_5TH_G9_01_F01	1059	CENPB	NM_001810.5	511	525	class1	IR_205
2908	NR3C1	NM_000176	1	777	IVV_S20051122_F03_01_A05	4297	MLL	NM_005933.2	2643	2653	class2	IR_163
2908	NR3C1	NM_000176	1	777	IVV_S20051122_F03_01_A11	8125	ANP32A	NM_006305.2	216	245	class2	IR_164
2908	NR3C1	NM_000176	1	777	IVV_S20051122_F03_01_E10	6430	SFRS5	NM_001039465.1	166	179	class2	IR_165
2908	NR3C1	NM_000176	1	777	IVV_S20051122_F03_01_F11	5530	PPP3CA	NM_000944.2	372	383	class2	IR_167
2908	NR3C1	NM_000176	1	777	IVV_S20051122_F03_01_G07	52	ACP1	NM_001040649.1	31	40	class2	IR_168
2908	NR3C1	NM_000176	1	777	IVV_S20051122_F03_02_B11	23136	EPB41L3	NM_012307.2	1035	1043	class2	IR_169
2908	NR3C1	NM_000176	1	777	IVV_S20051122_F03_02_F05	8453	CUL2	NM_003591.2	664	677	class2	IR_170
2908	NR3C1	NM_000176	1	777	IVV_S20051122_F03_02_H06	140597	TCEAL2	NM_080390.3	168	189	class2	IR_171
2908	NR3C1	NM_000176	1	777	IVV_S20051122_F03_03_F10	5799	PTPRN2	NM_002847.2	341	350	class2	IR_172
2908	NR3C1	NM_000176	1	777	IVV_S20051122_F03_03_G01	9669	EIF5B	NM_015904.3	537	559	class2	IR_173
2908	NR3C1	NM_000176	1	777	IVV_S20051122_F03_04_C09	2037	EPB41L2	NM_001431.1	172	188	class2	IR_174
2908	NR3C1	NM_000176	77	262	IVV_S20051122_G09_01_F02	7110	TMF1	NM_007114.2	876	906	class2	IR_202
2908	NR3C1	NM_000176	77	262	IVV_S20051122_G09_02_E12	23469	PHF3	NM_015153.1	1928	1937	class2	IR_203
2908	NR3C1	NM_000176	77	262	IVV_S20051122_G09_02_H03	7267	TTC3	NM_003316.3	1169	1183	class2	IR_204
2908	NR3C1	NM_000176	77	262	IVV_S20051122_G09_03_C07	9414	TJP2	NM_004817.2	879	892	class2	IR_206
2908	NR3C1	NM_000176	1	777	IVV_S20060609_5TH_F3_02_F07	11244	ZHX1	NM_001017926.1	826	838	class2	IR_334
2908	NR3C1	NM_000176	1	777	IVV_S20060609_5TH_F3_04_A06	6249	RSN	NM_002956.2	897	906	class2	IR_335
2908	NR3C1	NM_000176	1	777	IVV_S20060609_5TH_F3_04_C08	64061	TSPYL2	NM_022117.1	503	516	class2	IR_336
2908	NR3C1	NM_000176	1	777	IVV_S20060609_5TH_F3_04_E05	805	CALM2	NM_001743.3	20	31	class2	IR_337
2908	NR3C1	NM_000176	1	777	IVV_S20060609_5TH_F3_04_E12	3895	KTN1	NM_182926.2	466	514	class2	IR_338
2908	NR3C1	NM_000176	1	777	IVV_S20060609_5TH_F3_04_H01	1974	EIF4A2	NM_001967.3	353	367	class2	IR_339
2908	NR3C1	NM_000176	77	262	IVV_S20060609_5TH_G9_02_F01	7915	ALDH5A1	NM_170740.1	377	390	class2	IR_374
2908	NR3C1	NM_000176	77	262	IVV_S20060609_5TH_G9_02_H12	1191	CLU	NM_203339.1	16	53	class2	IR_375
2908	NR3C1	NM_000176	77	262	IVV_S20060609_5TH_G9_04_A09	9729	KIAA0408	NM_014702.3	97	114	class2	IR_376
2908	NR3C1	NM_000176	1	777	IVV_S20060609_7TH_F3_01_A03	23215	BAT2D1	NM_015172.3	556	571	class2	IR_523
2908	NR3C1	NM_000176	1	777	IVV_S20060609_7TH_F3_01_F09	51503	HSPC148	NM_016403.2	137	148	class2	IR_524
2908	NR3C1	NM_000176	1	777	IVV_S20060609_7TH_F3_02_E07	6595	SMARCA2	NM_003070.3	1349	1368	class2	IR_525
2908	NR3C1	NM_000176	1	777	IVV_S20060609_7TH_F3_02_G06	158399	ZNF483	NM_133464.1	118	129	class2	IR_526
2908	NR3C1	NM_000176	1	777	IVV_S20060609_7TH_F3_02_H02	6741	SSB	NM_003142.2	258	271	class2	IR_527
2908	NR3C1	NM_000176	1	777	IVV_S20060609_7TH_F3_03_D01	9967	THRAP3	NM_005119.2	414	435	class2	IR_528
2908	NR3C1	NM_000176	1	777	IVV_S20060609_7TH_F3_03_H11	481	ATP1B1	NM_001677.3	269	289	class2	IR_529
2908	NR3C1	NM_000176	1	777	IVV_S20060609_7TH_F3_04_A10	1213	CLTC	NM_004859.3	1613	1628	class2	IR_530
3164	NR4A1	NM_002135	1	269	IVV_S20051122_H09_01_H11	51596	CUTA	NM_001014840.1	120	144	class2	IR_212
3164	NR4A1	NM_002135	1	269	IVV_S20051122_H09_03_A11	5705	PSMC5	NM_002805.4	217	226	class2	IR_213
3164	NR4A1	NM_002135	1	269	IVV_S20051122_H09_04_A09	2170	FABP3	NM_004102.3	81	101	class2	IR_214
3164	NR4A1	NM_002135	1	269	IVV_S20051122_H09_04_F10	1191	CLU	NM_203339.1	80	93	class2	IR_215
3164	NR4A1	NM_002135	1	598	IVV_S20060609_5TH_B4_01_F02	51575	ESF1	NM_016649.3	684	696	class2	IR_224
3164	NR4A1	NM_002135	1	598	IVV_S20060609_5TH_B4_02_A11	9782	MATR3	NM_199189.1	751	765	class2	IR_225
3164	NR4A1	NM_002135	1	598	IVV_S20060609_5TH_B4_03_F04	25978	CHMP2B	NM_014043.2	44	53	class2	IR_226
3164	NR4A1	NM_002135	1	598	IVV_S20060609_5TH_B4_04_A02	23040	MYT1L	NM_015025.2	1061	1079	class2	IR_227
3164	NR4A1	NM_002135	1	598	IVV_S20060609_5TH_B4_04_C10	23085	ERC1	NM_178037.1	667	677	class2	IR_228
3164	NR4A1	NM_002135	1	598	IVV_S20060609_5TH_B4_04_F07	5098	PCDHGC3	NM_002588.2	920	931	class2	IR_229
3164	NR4A1	NM_002135	1	598	IVV_S20060609_5TH_B4_04_F08	10382	TUBB4	NM_006087.2	34	46	class2	IR_230
3164	NR4A1	NM_002135	1	269	IVV_S20060609_5TH_H9_01_C02	55023	PHIP	NM_017934.4	1701	1711	class2	IR_404
3164	NR4A1	NM_002135	1	269	IVV_S20060609_5TH_H9_01_E11	7013	TERF1	NM_017489.1	415	438	class2	IR_405
3164	NR4A1	NM_002135	1	269	IVV_S20060609_5TH_H9_02_F06	8777	MPDZ	NM_003829.1	1966	1976	class2	IR_406
3164	NR4A1	NM_002135	1	269	IVV_S20060609_5TH_H9_04_H06	10808	HSPH1	NM_006644.2	625	646	class2	IR_407
3164	NR4A1	NM_002135	1	598	IVV_S20051122_B04_02_D05	54467	ANKIB1	XM_377955.4	846	858	class2	IR_61
3164	NR4A1	NM_002135	1	598	IVV_S20051122_B04_02_E09	9730	VPRBP	NM_014703.1	1407	1425	class2	IR_62
3164	NR4A1	NM_002135	1	598	IVV_T051018_B4_B21	9581	PREPL	NM_006036.3	483	502	class2	IR_635
3164	NR4A1	NM_002135	1	598	IVV_T051018_B4_D20	9782	MATR3	NM_199189.1	482	493	class2	IR_636
3164	NR4A1	NM_002135	1	598	IVV_T051018_B4_F02	1108	CHD4	NM_001273.2	1656	1678	class2	IR_637
3164	NR4A1	NM_002135	1	598	IVV_T051018_B4_F09	1059	CENPB	NM_001810.5	509	528	class2	IR_638
3164	NR4A1	NM_002135	1	598	IVV_T051018_B4_M24	5414	SEPT4	NM_004574.2	447	459	class2	IR_639
3164	NR4A1	NM_002135	1	598	IVV_T051018_B4_P09	7408	VASP	NM_003370.3	283	293	class2	IR_640
3164	NR4A1	NM_002135	1	598	IVV_T060407_B04_O23	7184	HSP90B1	NM_003299.1	770	787	class2	IR_915
4929	NR4A2	NM_173172	1	455	IVV_S20060609_5TH_B8_01_B07	2969	GTF2I	NM_032999.1	728	744	class2	IR_231
4929	NR4A2	NM_173172	1	455	IVV_S20060609_5TH_B8_02_D08	55847	ZCD1	NM_018464.2	40	54	class2	IR_232
4929	NR4A2	NM_173172	1	455	IVV_S20060609_5TH_B8_03_C04	340543	TCEAL5	NM_001012979.1	9	19	class2	IR_233
4929	NR4A2	NM_173172	1	455	IVV_S20060609_5TH_B8_03_D09	5901	RAN	NM_006325.2	205	216	class2	IR_234
4929	NR4A2	NM_173172	1	455	IVV_S20060609_5TH_B8_03_F01	51538	ZCCHC17	NM_016505.2	231	241	class2	IR_235
4929	NR4A2	NM_173172	1	455	IVV_S20060609_5TH_B8_03_H09	4976	OPA1	NM_130837.1	273	294	class2	IR_236
4929	NR4A2	NM_173172	1	455	IVV_S20060609_5TH_B8_04_B01	7592	ZNF41	NM_153380.1	573	585	class2	IR_237
4929	NR4A2	NM_173172	1	455	IVV_S20060609_7TH_B8_01_B01	81611	ANP32E	NM_030920.2	159	172	class2	IR_481
4929	NR4A2	NM_173172	1	455	IVV_S20060609_7TH_B8_03_H02	9031	BAZ1B	NM_032408.2	554	576	class2	IR_482
4929	NR4A2	NM_173172	1	455	IVV_S20060609_7TH_B8_04_F10	4741	NEFM	NM_005382.1	808	818	class2	IR_483
4929	NR4A2	NM_173172	1	455	IVV_S20060609_7TH_B8_04_G11	4725	NDUFS5	NM_004552.1	71	90	class2	IR_484
4929	NR4A2	NM_173172	1	455	IVV_S20051122_B08_01_A12	8661	EIF3S10	NM_003750.2	830	853	class2	IR_71
4929	NR4A2	NM_173172	1	455	IVV_S20051122_B08_03_F04	10147	SFRS14	NM_001017392.1	1067	1077	class2	IR_72
10133	OPTN	AK055403	154	186	IVV_T060117_D11_A11	27089	UQCRQ	NM_014402.4	65	73	class1	IR_803
10133	OPTN	AK055403	154	186	IVV_T060117_D11_I09	27089	UQCRQ	NM_014402.4	65	73	class1	IR_803
10133	OPTN	AK055403	154	186	IVV_T060117_D11_A22	55719	C10orf6	NM_018121.2	673	684	class1	IR_804
10133	OPTN	AK055403	154	186	IVV_T060117_D11_I12	55719	C10orf6	NM_018121.2	673	684	class1	IR_804
10133	OPTN	AK055403	154	186	IVV_T060117_D11_G18	2778	GNAS	NM_000516.4	13	24	class1	IR_806
10133	OPTN	AK055403	154	186	IVV_T060117_D11_N03	2778	GNAS	NM_000516.4	13	24	class1	IR_806
10133	OPTN	AK055403	154	186	IVV_S20060609_5TH_D11_01_F07	23499	MACF1	NM_033044.2	2279	2292	class2	IR_262
10133	OPTN	AK055403	154	186	IVV_S20060609_5TH_D11_01_G02	153527	ZMAT2	NM_144723.1	138	168	class2	IR_263
10133	OPTN	AK055403	154	186	IVV_S20060609_5TH_D11_01_G10	1059	CENPB	NM_001810.5	507	528	class2	IR_264
10133	OPTN	AK055403	154	186	IVV_S20060609_5TH_D11_01_H03	3313	HSPA9	NM_004134.4	36	54	class2	IR_265
10133	OPTN	AK055403	154	186	IVV_S20060609_5TH_D11_02_H08	1982	EIF4G2	NM_001418.3	472	493	class2	IR_266
10133	OPTN	AK055403	154	186	IVV_S20060609_5TH_D11_02_H12	10313	RTN3	NM_201428.1	983	999	class2	IR_267
10133	OPTN	AK055403	154	186	IVV_S20060609_5TH_D11_03_C10	91942	NDUFA12L	NM_174889.2	43	70	class2	IR_268
10133	OPTN	AK055403	154	186	IVV_S20060609_5TH_D11_03_D06	8831	SYNGAP1	NM_006772.1	541	549	class2	IR_269
10133	OPTN	AK055403	154	186	IVV_S20060609_5TH_D11_03_E08	10969	EBNA1BP2	NM_006824.1	174	190	class2	IR_270
10133	OPTN	AK055403	154	186	IVV_S20060609_5TH_D11_04_H04	23172	KIAA0157	NM_032182.2	139	153	class2	IR_271
10133	OPTN	AK055403	154	186	IVV_T060117_D11_D18	6168	RPL37A	NM_000998.4	43	53	class2	IR_805
7849	PAX8	NM_003466	1	450	IVV_T060407_E04_A18	310	ANXA7	NM_004034.1	194	221	class1	IR_954
7849	PAX8	NM_003466	1	450	IVV_T060407_E04_D22	310	ANXA7	NM_004034.1	194	219	class1	IR_954
7849	PAX8	NM_003466	1	450	IVV_S20060609_5TH_E4_03_C11	57515	SERINC1	NM_020755.2	179	189	class2	IR_311
7849	PAX8	NM_003466	1	450	IVV_S20060609_5TH_E4_04_A06	4691	NCL	NM_005381.2	194	204	class2	IR_312
7849	PAX8	NM_003466	1	450	IVV_S20060609_5TH_E4_04_B07	3303	HSPA1A	NM_005345.4	556	568	class2	IR_313
7849	PAX8	NM_003466	1	450	IVV_S20060609_5TH_E4_04_D07	22883	CLSTN1	NM_001009566.1	706	726	class2	IR_314
7849	PAX8	NM_003466	1	450	IVV_T051018_E4_A07	54665	RSBN1	NM_018364.3	247	264	class2	IR_716
7849	PAX8	NM_003466	1	450	IVV_T051018_E4_E08	4691	NCL	NM_005381.2	39	53	class2	IR_717
7849	PAX8	NM_003466	1	450	IVV_T051018_E4_K03	85451	ZC3H5	XM_036115.8	594	618	class2	IR_718
7849	PAX8	NM_003466	1	450	IVV_T051018_E4_L13	55319	FLJ11184	NM_018352.1	167	197	class2	IR_719
7849	PAX8	NM_003466	1	450	IVV_T060407_E04_F13	6181	RPLP2	NM_001004.3	28	52	class2	IR_955
5092	PCBD1	NM_000281	1	104	IVV_S20060609_7TH_B5_04_F04	351	APP	NM_000484.2	245	264	class1	IR_474
5092	PCBD1	NM_000281	1	104	IVV_S20060609_7TH_B5_01_F10	351	APP	NM_000484.2	226	253	class1	IR_474
5092	PCBD1	NM_000281	1	104	IVV_S20060609_7TH_B5_02_A05	6229	RPS24	NM_033022.2	104	116	class1	IR_475
5092	PCBD1	NM_000281	1	104	IVV_T051018_B5_L20	6229	RPS24	NM_033022.2	99	119	class1	IR_475
5092	PCBD1	NM_000281	1	104	IVV_S20060609_7TH_B5_02_F11	3799	KIF5B	NM_004521.1	736	745	class2	IR_476
5092	PCBD1	NM_000281	1	104	IVV_S20060609_7TH_B5_03_E03	57579	KIAA1411	NM_020819.2	849	871	class2	IR_477
5092	PCBD1	NM_000281	1	104	IVV_S20060609_7TH_B5_04_E09	23215	BAT2D1	NM_015172.3	1494	1511	class2	IR_478
5092	PCBD1	NM_000281	1	104	IVV_S20060609_7TH_B5_04_F08	53353	LRP1B	NM_018557.2	134	148	class2	IR_479
5092	PCBD1	NM_000281	1	104	IVV_S20060609_7TH_B5_04_H01	192111	PGAM5	NM_138575.1	73	83	class2	IR_480
5092	PCBD1	NM_000281	1	104	IVV_T051018_B5_A15	4131	MAP1B	NM_005909.2	1081	1104	class2	IR_641
5092	PCBD1	NM_000281	1	104	IVV_T051018_B5_C02	23040	MYT1L	NM_015025.2	297	314	class2	IR_642
5092	PCBD1	NM_000281	1	104	IVV_T051018_B5_G04	4792	NFKBIA	NM_020529.1	272	287	class2	IR_643
5092	PCBD1	NM_000281	1	104	IVV_T051018_B5_I03	10054	SAE2	NM_005499.2	618	631	class2	IR_644
5092	PCBD1	NM_000281	1	104	IVV_T051018_B5_P06	9053	MAP7	NM_003980.3	104	114	class2	IR_645
5092	PCBD1	NM_000281	1	104	IVV_T060117_B5_A04	9984	THOC1	NM_005131.1	280	294	class2	IR_761
5092	PCBD1	NM_000281	1	104	IVV_T060117_B5_A19	478	ATP1A3	NM_152296.3	469	483	class2	IR_762
5092	PCBD1	NM_000281	1	104	IVV_T060117_B5_B11	3312	HSPA8	NM_006597.3	496	507	class2	IR_763
5092	PCBD1	NM_000281	1	104	IVV_T060117_B5_C18	6595	SMARCA2	NM_003070.3	1504	1513	class2	IR_764
5092	PCBD1	NM_000281	1	104	IVV_T060117_B5_D07	10383	TUBB2C	NM_006088.5	112	123	class2	IR_765
5092	PCBD1	NM_000281	1	104	IVV_T060117_B5_D09	6857	SYT1	NM_005639.1	91	113	class2	IR_766
5092	PCBD1	NM_000281	1	104	IVV_T060117_B5_D16	22863	KIAA0831	NM_014924.3	132	144	class2	IR_767
5092	PCBD1	NM_000281	1	104	IVV_T060117_B5_E05	22985	ACIN1	NM_014977.1	1256	1265	class2	IR_768
5092	PCBD1	NM_000281	1	104	IVV_T060117_B5_E18	3798	KIF5A	NM_004984.2	342	352	class2	IR_769
5092	PCBD1	NM_000281	1	104	IVV_T060117_B5_F22	6767	ST13	NM_003932.3	253	267	class2	IR_770
5092	PCBD1	NM_000281	1	104	IVV_T060117_B5_I19	63827	BCAN	NM_021948.3	452	468	class2	IR_771
5092	PCBD1	NM_000281	1	104	IVV_T060117_B5_I20	4594	MUT	NM_000255.1	735	745	class2	IR_772
5092	PCBD1	NM_000281	1	104	IVV_T060117_B5_J08	4691	NCL	NM_005381.2	232	251	class2	IR_773
5092	PCBD1	NM_000281	1	104	IVV_T060117_B5_L09	6206	RPS12	NM_001016.3	79	98	class2	IR_774
5092	PCBD1	NM_000281	1	104	IVV_T060407_B05_H20	27243	CHMP2A	NM_198426.1	142	159	class2	IR_916
5092	PCBD1	NM_000281	1	104	IVV_T060407_B05_K24	10814	CPLX2	NM_006650.3	54	65	class2	IR_917
5092	PCBD1	NM_000281	1	104	IVV_T060407_B05_M17	7095	TLOC1	NM_003262.3	132	143	class2	IR_918
5245	PHB	NM_002634	1	272	IVV_S20060609_7TH_C4_01_C09	1345	COX6C	NM_004374.2	58	68	class1	IR_247
5245	PHB	NM_002634	1	272	IVV_S20060609_5TH_C4_01_A04	1345	COX6C	NM_004374.2	39	63	class1	IR_247
5245	PHB	NM_002634	1	272	IVV_T060117_C4_G17	4673	NAP1L1	NM_139207.1	345	357	class1	IR_797
5245	PHB	NM_002634	1	272	IVV_T060117_C4_H12	4673	NAP1L1	NM_139207.1	346	359	class1	IR_797
5245	PHB	NM_002634	1	272	IVV_S20060609_5TH_C4_01_B06	4131	MAP1B	NM_005909.2	940	950	class2	IR_248
5245	PHB	NM_002634	1	272	IVV_S20060609_5TH_C4_01_E02	8239	USP9X	NM_001039590.1	1408	1420	class2	IR_249
5245	PHB	NM_002634	1	272	IVV_S20060609_5TH_C4_01_F12	23085	ERC1	NM_178037.1	777	789	class2	IR_250
5245	PHB	NM_002634	1	272	IVV_S20060609_5TH_C4_02_A03	6334	SCN8A	NM_014191.2	1377	1391	class2	IR_251
5245	PHB	NM_002634	1	272	IVV_S20060609_5TH_C4_03_F07	5757	PTMA	NM_002823.2	22	37	class2	IR_252
5245	PHB	NM_002634	1	272	IVV_S20060609_5TH_C4_04_B10	55193	PB1	NM_018313.3	1283	1303	class2	IR_253
5245	PHB	NM_002634	1	272	IVV_S20060609_5TH_C4_04_D08	102	ADAM10	NM_001110.2	569	579	class2	IR_254
5245	PHB	NM_002634	1	272	IVV_S20060609_7TH_C4_01_F12	51503	HSPC148	NM_016403.2	113	147	class2	IR_494
5245	PHB	NM_002634	1	272	IVV_S20060609_7TH_C4_01_H07	3326	HSP90AB1	NM_007355.2	542	555	class2	IR_495
5245	PHB	NM_002634	1	272	IVV_S20060609_7TH_C4_02_C06	161835	FSIP1	NM_152597.4	136	158	class2	IR_496
5245	PHB	NM_002634	1	272	IVV_S20060609_7TH_C4_02_E07	140597	TCEAL2	NM_080390.3	169	189	class2	IR_497
5245	PHB	NM_002634	1	272	IVV_S20060609_7TH_C4_02_H06	11215	AKAP11	NM_016248.2	1792	1808	class2	IR_498
5245	PHB	NM_002634	1	272	IVV_S20060609_7TH_C4_02_H12	1804	DPP6	NM_001039350.1	737	757	class2	IR_499
5245	PHB	NM_002634	1	272	IVV_S20060609_7TH_C4_03_A09	23469	PHF3	NM_015153.1	1977	2016	class2	IR_500
5245	PHB	NM_002634	1	272	IVV_S20060609_7TH_C4_03_F04	1106	CHD2	NM_001271.3	1395	1417	class2	IR_501
5245	PHB	NM_002634	1	272	IVV_S20060609_7TH_C4_03_F07	2962	GTF2F1	NM_002096.1	314	334	class2	IR_502
5245	PHB	NM_002634	1	272	IVV_S20060609_7TH_C4_04_H02	10541	ANP32B	NM_006401.2	165	189	class2	IR_503
5245	PHB	NM_002634	1	272	IVV_T060117_C4_A20	79836	LONRF3	NM_001031855.1	533	544	class2	IR_792
5245	PHB	NM_002634	1	272	IVV_T060117_C4_B01	51260	CXorf26	NM_016500.3	181	215	class2	IR_793
5245	PHB	NM_002634	1	272	IVV_T060117_C4_B22	84251	SGIP1	NM_032291.2	46	59	class2	IR_794
5245	PHB	NM_002634	1	272	IVV_T060117_C4_F01	6418	SET	NM_003011.1	236	254	class2	IR_795
5245	PHB	NM_002634	1	272	IVV_T060117_C4_G12	170506	DHX36	NM_020865.1	398	420	class2	IR_796
5245	PHB	NM_002634	1	272	IVV_T060117_C4_H21	55176	SEC61A2	NM_018144.2	459	468	class2	IR_798
5308	PITX2	NM_153426	1	317	IVV_S20051122_C07_01_A07	5982	RFC2	NM_181471.1	105	133	class2	IR_102
5308	PITX2	NM_153426	1	317	IVV_S20051122_C07_01_D01	57512	GPR158	NM_020752.2	849	861	class2	IR_103
5308	PITX2	NM_153426	1	317	IVV_S20051122_C07_03_B04	5567	PRKACB	NM_002731.2	210	219	class2	IR_104
5468	PPARG	NM_005037	1	475	IVV_S20051122_H03_01_A04	55704	KIAA1212	NM_018084.3	400	424	class2	IR_207
5468	PPARG	NM_005037	1	475	IVV_S20051122_H03_01_A09	11100	HNRPUL1	NM_007040.2	171	180	class2	IR_208
5468	PPARG	NM_005037	1	475	IVV_S20051122_H03_02_E01	8237	USP11	NM_004651.3	653	662	class2	IR_209
5468	PPARG	NM_005037	1	475	IVV_S20051122_H03_03_H04	203068	TUBB	NM_178014.2	331	346	class2	IR_210
5468	PPARG	NM_005037	1	475	IVV_S20051122_H03_04_A10	5621	PRNP	NM_000311.2	193	202	class2	IR_211
5468	PPARG	NM_005037	1	475	IVV_S20060609_5TH_H3_01_B05	1191	CLU	NM_203339.1	77	93	class2	IR_394
5468	PPARG	NM_005037	1	475	IVV_S20060609_5TH_H3_01_B07	57680	CHD8	NM_020920.2	218	234	class2	IR_395
5468	PPARG	NM_005037	1	475	IVV_S20060609_5TH_H3_01_B10	1191	CLU	NM_203339.1	426	435	class2	IR_396
5468	PPARG	NM_005037	1	475	IVV_S20060609_5TH_H3_01_F09	5707	PSMD1	NM_002807.2	495	511	class2	IR_397
5468	PPARG	NM_005037	1	475	IVV_S20060609_5TH_H3_02_D05	3925	STMN1	NM_203401.1	93	113	class2	IR_398
5468	PPARG	NM_005037	1	475	IVV_S20060609_5TH_H3_02_D11	10299	MARCH6	NM_005885.2	226	245	class2	IR_399
5468	PPARG	NM_005037	1	475	IVV_S20060609_5TH_H3_03_A04	9448	MAP4K4	NM_145686.2	432	477	class2	IR_400
5468	PPARG	NM_005037	1	475	IVV_S20060609_5TH_H3_03_E05	528	ATP6V1C1	NM_001695.3	59	85	class2	IR_401
5468	PPARG	NM_005037	1	475	IVV_S20060609_5TH_H3_03_H11	10133	OPTN	NM_001008211.1	477	490	class2	IR_402
5468	PPARG	NM_005037	1	475	IVV_S20060609_5TH_H3_04_H06	3326	HSP90AB1	NM_007355.2	256	283	class2	IR_403
5573	PRKAR1A	NM_002734	1	381	IVV_S20060609_7TH_D4_01_D12	6218	RPS17	NM_001021.3	51	78	class2	IR_509
5573	PRKAR1A	NM_002734	1	381	IVV_S20060609_7TH_D4_02_B06	84707	BEX2	NM_032621.2	17	26	class2	IR_510
5573	PRKAR1A	NM_002734	1	381	IVV_S20060609_7TH_D4_03_A02	6749	SSRP1	NM_003146.2	446	459	class2	IR_511
5573	PRKAR1A	NM_002734	1	381	IVV_S20060609_7TH_D4_03_C08	10075	HUWE1	NM_031407.3	2436	2455	class2	IR_512
5573	PRKAR1A	NM_002734	1	381	IVV_S20060609_7TH_D4_03_E02	29117	BRD7	NM_013263.2	62	93	class2	IR_513
5573	PRKAR1A	NM_002734	1	381	IVV_S20060609_7TH_D4_04_E12	1000	CDH2	NM_001792.2	765	777	class2	IR_514
5573	PRKAR1A	NM_002734	1	381	IVV_S20060609_7TH_D4_04_G06	6812	STXBP1	NM_003165.1	11	19	class2	IR_515
5573	PRKAR1A	NM_002734	1	381	IVV_T051018_D4_A01	340543	TCEAL5	NM_001012979.1	10	31	class2	IR_691
5573	PRKAR1A	NM_002734	1	381	IVV_T051018_D4_B19	4659	PPP1R12A	NM_002480.1	330	366	class2	IR_692
5573	PRKAR1A	NM_002734	1	381	IVV_T051018_D4_B21	10087	COL4A3BP	NM_005713.1	184	204	class2	IR_693
5573	PRKAR1A	NM_002734	1	381	IVV_T051018_D4_J21	2547	XRCC6	NM_001469.3	532	545	class2	IR_694
5573	PRKAR1A	NM_002734	1	381	IVV_T051018_D4_K10	5066	PAM	NM_000919.2	284	297	class2	IR_695
5573	PRKAR1A	NM_002734	1	381	IVV_T060117_D4_E05	6418	SET	NM_003011.1	228	242	class2	IR_807
5573	PRKAR1A	NM_002734	1	381	IVV_T060117_D4_G05	6418	SET	NM_003011.1	248	261	class2	IR_808
5573	PRKAR1A	NM_002734	1	381	IVV_T060117_D4_I04	9481	SLC25A27	NM_004277.3	252	264	class2	IR_809
5573	PRKAR1A	NM_002734	1	381	IVV_T060117_D4_J02	6711	SPTBN1	NM_178313.2	268	278	class2	IR_810
5573	PRKAR1A	NM_002734	1	381	IVV_T060117_D4_J13	23070	KIAA0082	NM_015050.1	168	179	class2	IR_811
5573	PRKAR1A	NM_002734	1	381	IVV_T060117_D4_J21	128866	CHMP4B	NM_176812.3	202	211	class2	IR_812
5573	PRKAR1A	NM_002734	1	381	IVV_T060117_D4_P01	10541	ANP32B	NM_006401.2	180	201	class2	IR_813
5573	PRKAR1A	NM_002734	1	381	IVV_T060117_D4_P21	4691	NCL	NM_005381.2	246	270	class2	IR_814
5881	RAC3	NM_005052	1	192	IVV_T051018_C8_H16	3945	LDHB	NM_002300.3	172	193	class2	IR_683
5881	RAC3	NM_005052	1	192	IVV_T051018_C8_J13	55285	RBM41	NM_018301.2	365	388	class2	IR_684
5881	RAC3	NM_005052	1	192	IVV_T051018_C8_K21	3097	HIVEP2	NM_006734.3	1745	1755	class2	IR_685
5881	RAC3	NM_005052	1	192	IVV_T060117_C8_D12	51503	HSPC148	NM_016403.2	52	68	class2	IR_799
5881	RAC3	NM_005052	1	192	IVV_T060117_C8_F24	51123	ZNF706	NM_001042510.1	4	16	class2	IR_800
5881	RAC3	NM_005052	1	192	IVV_T060117_C8_K15	9879	DDX46	NM_014829.2	122	135	class2	IR_801
5881	RAC3	NM_005052	1	192	IVV_T060407_C08_D09	4691	NCL	NM_005381.2	251	269	class2	IR_934
5881	RAC3	NM_005052	1	192	IVV_T060407_C08_I06	27101	CACYBP	NM_014412.2	210	223	class2	IR_935
5881	RAC3	NM_005052	1	192	IVV_T060407_C08_J06	4741	NEFM	NM_005382.1	472	498	class2	IR_936
5881	RAC3	NM_005052	1	192	IVV_T060407_C08_K18	4673	NAP1L1	NM_139207.1	350	361	class2	IR_937
5881	RAC3	NM_005052	1	192	IVV_T060407_C08_L19	51319	RSRC1	NM_016625.2	125	155	class2	IR_938
5881	RAC3	NM_005052	1	192	IVV_T060407_C08_M20	51389	RWDD1	NM_016104.2	27	38	class2	IR_939
5925	RB1	BC040540	379	928	IVV_T060117_G10_C04	4691	NCL	NM_005381.2	383	392	class2	IR_875
5925	RB1	BC040540	379	928	IVV_T060117_G10_D05	4741	NEFM	NM_005382.1	808	818	class2	IR_876
5925	RB1	BC040540	379	928	IVV_T060117_G10_G04	2936	GSR	NM_000637.2	449	473	class2	IR_877
5925	RB1	BC040540	379	928	IVV_T060117_G10_J01	55435	C4orf16	NM_018569.2	202	215	class2	IR_878
5925	RB1	BC040540	379	928	IVV_T060117_G10_J21	5414	SEPT4	NM_004574.2	452	462	class2	IR_879
5925	RB1	BC040540	379	928	IVV_T060117_G10_J23	8106	PABPN1	NM_004643.1	126	142	class2	IR_880
6257	RXRB	NM_021976	1	273	IVV_T060117_F11_C11	5763	PTMS	NM_002824.4	48	76	class1	IR_855
6257	RXRB	NM_021976	1	273	IVV_T060117_F11_E17	5763	PTMS	NM_002824.4	48	68	class1	IR_855
6257	RXRB	NM_021976	1	273	IVV_S20060609_5TH_F11_02_G04	147495	APCDD1	NM_153000.3	315	324	class2	IR_331
6257	RXRB	NM_021976	1	273	IVV_S20060609_5TH_F11_02_H02	55219	TMEM57	NM_018202.3	447	464	class2	IR_332
6257	RXRB	NM_021976	1	273	IVV_S20060609_5TH_F11_04_C08	5046	PCSK6	NM_002570.3	133	146	class2	IR_333
6257	RXRB	NM_021976	1	273	IVV_T051018_F11_B12	3798	KIF5A	NM_004984.2	460	487	class2	IR_731
6257	RXRB	NM_021976	1	273	IVV_T051018_F11_O13	90411	MCFD2	NM_139279.3	85	104	class2	IR_732
6257	RXRB	NM_021976	1	273	IVV_T051018_F11_P18	79982	DNAJB14	NM_024920.3	28	40	class2	IR_733
6257	RXRB	NM_021976	1	273	IVV_T051018_F11_P23	6655	SOS2	NM_006939.1	263	286	class2	IR_734
6257	RXRB	NM_021976	1	273	IVV_T060117_F11_A01	6902	TBCA	NM_004607.2	31	41	class2	IR_852
6257	RXRB	NM_021976	1	273	IVV_T060117_F11_A03	1211	CLTA	NM_007096.2	126	150	class2	IR_853
6257	RXRB	NM_021976	1	273	IVV_T060117_F11_B08	774	CACNA1B	NM_000718.1	1313	1330	class2	IR_854
6257	RXRB	NM_021976	1	273	IVV_T060117_F11_C13	521	ATP5I	NM_007100.2	37	47	class2	IR_856
6257	RXRB	NM_021976	1	273	IVV_T060117_F11_E04	10815	CPLX1	NM_006651.3	8	25	class2	IR_857
6257	RXRB	NM_021976	1	273	IVV_T060117_F11_F03	55175	KLHL11	NM_018143.1	438	460	class2	IR_858
6257	RXRB	NM_021976	1	273	IVV_T060117_F11_H12	22930	RAB3GAP1	NM_012233.1	525	534	class2	IR_859
6257	RXRB	NM_021976	1	273	IVV_T060117_F11_I14	6741	SSB	NM_003142.2	299	311	class2	IR_860
6257	RXRB	NM_021976	1	273	IVV_T060117_F11_K23	84220	RGPD5	NM_005054.2	1017	1031	class2	IR_861
6257	RXRB	NM_021976	1	273	IVV_T060117_F11_L24	7184	HSP90B1	NM_003299.1	35	53	class2	IR_862
6257	RXRB	NM_021976	1	273	IVV_T060117_F11_M21	8661	EIF3S10	NM_003750.2	858	876	class2	IR_863
6257	RXRB	NM_021976	1	273	IVV_T060407_F11_C09	53407	STX18	NM_016930.2	67	90	class2	IR_960
6257	RXRB	NM_021976	1	273	IVV_T060407_F11_D11	26060	APPL	NM_012096.1	688	705	class2	IR_961
6257	RXRB	NM_021976	1	273	IVV_T060407_F11_D17	9905	RUTBC1	NM_014853.1	8	18	class2	IR_962
6257	RXRB	NM_021976	1	273	IVV_T060407_F11_L21	7415	VCP	NM_007126.2	157	167	class2	IR_963
6257	RXRB	NM_021976	1	273	IVV_T060407_F11_M12	4155	MBP	NM_001025100.1	120	139	class2	IR_964
6257	RXRB	NM_021976	1	273	IVV_T060407_F11_M20	5530	PPP3CA	NM_000944.2	392	424	class2	IR_965
6257	RXRB	NM_021976	1	273	IVV_T060407_F11_O13	11051	NUDT21	NM_007006.2	63	78	class2	IR_966
6258	RXRG	NM_006917	1	463	IVV_T051018_A5_P14	7707	ZNF148	NM_021964.1	80	93	class2	IR_629
29970	SCHIP1	NM_014575	306	486	IVV_S20051122_C10_03_G08	23091	ZC3H13	NM_015070.3	754	778	class1	IR_109
29970	SCHIP1	NM_014575	402	479	IVV_S20051122_D10_03_F04	23091	ZC3H13	NM_015070.3	750	784	class1	IR_109
29970	SCHIP1	NM_014575	402	479	IVV_S20060609_5TH_D10_02_D01	5763	PTMS	NM_002824.4	36	48	class1	IR_259
29970	SCHIP1	NM_014575	402	479	IVV_T051018_D10_C06	5763	PTMS	NM_002824.4	36	48	class1	IR_259
29970	SCHIP1	NM_014575	306	486	IVV_T051018_C10_M16	7114	TMSB4X	NM_021109.2	22	38	class1	IR_666
29970	SCHIP1	NM_014575	1	487	IVV_T051018_C5_P12	7114	TMSB4X	NM_021109.2	22	37	class1	IR_666
29970	SCHIP1	NM_014575	1	487	IVV_T051018_C5_M08	7114	TMSB4X	NM_021109.2	20	38	class1	IR_666
29970	SCHIP1	NM_014575	1	487	IVV_S20051122_C05_04_D10	60592	SCOC	NM_032547.1	59	117	class1	IR_92
29970	SCHIP1	NM_014575	1	487	IVV_S20051122_C05_01_A03	60592	SCOC	NM_032547.1	56	87	class1	IR_92
29970	SCHIP1	NM_014575	1	487	IVV_S20051122_C05_01_C12	60592	SCOC	NM_032547.1	56	87	class1	IR_92
29970	SCHIP1	NM_014575	1	487	IVV_S20051122_C05_01_D07	60592	SCOC	NM_032547.1	56	87	class1	IR_92
29970	SCHIP1	NM_014575	1	487	IVV_S20051122_C05_01_F08	60592	SCOC	NM_032547.1	58	116	class1	IR_92
29970	SCHIP1	NM_014575	1	487	IVV_S20051122_C05_01_H12	60592	SCOC	NM_032547.1	56	87	class1	IR_92
29970	SCHIP1	NM_014575	1	487	IVV_S20051122_C05_02_C12	60592	SCOC	NM_032547.1	56	87	class1	IR_92
29970	SCHIP1	NM_014575	1	487	IVV_S20051122_C05_02_E09	60592	SCOC	NM_032547.1	56	87	class1	IR_92
29970	SCHIP1	NM_014575	1	487	IVV_S20051122_C05_03_F08	60592	SCOC	NM_032547.1	56	87	class1	IR_92
29970	SCHIP1	NM_014575	1	487	IVV_S20051122_C05_03_F12	60592	SCOC	NM_032547.1	56	87	class1	IR_92
29970	SCHIP1	NM_014575	1	487	IVV_S20051122_C05_03_H04	60592	SCOC	NM_032547.1	56	87	class1	IR_92
29970	SCHIP1	NM_014575	1	487	IVV_S20051122_C05_03_H07	60592	SCOC	NM_032547.1	56	87	class1	IR_92
29970	SCHIP1	NM_014575	1	487	IVV_S20051122_C05_03_H11	60592	SCOC	NM_032547.1	56	87	class1	IR_92
29970	SCHIP1	NM_014575	1	487	IVV_S20051122_C05_04_A06	60592	SCOC	NM_032547.1	56	87	class1	IR_92
29970	SCHIP1	NM_014575	1	487	IVV_S20051122_C05_04_B02	60592	SCOC	NM_032547.1	56	87	class1	IR_92
29970	SCHIP1	NM_014575	1	487	IVV_S20051122_C05_04_C06	60592	SCOC	NM_032547.1	56	87	class1	IR_92
29970	SCHIP1	NM_014575	1	487	IVV_S20051122_C05_04_C07	60592	SCOC	NM_032547.1	56	87	class1	IR_92
29970	SCHIP1	NM_014575	1	487	IVV_S20051122_C05_04_G12	60592	SCOC	NM_032547.1	56	87	class1	IR_92
29970	SCHIP1	NM_014575	1	487	IVV_S20051122_C05_04_H05	60592	SCOC	NM_032547.1	56	87	class1	IR_92
29970	SCHIP1	NM_014575	306	486	IVV_S20051122_C10_02_H10	60592	SCOC	NM_032547.1	52	116	class1	IR_92
29970	SCHIP1	NM_014575	306	486	IVV_S20051122_C10_04_B07	60592	SCOC	NM_032547.1	56	95	class1	IR_92
29970	SCHIP1	NM_014575	306	486	IVV_S20051122_C10_04_D06	60592	SCOC	NM_032547.1	52	117	class1	IR_92
29970	SCHIP1	NM_014575	306	486	IVV_S20051122_C10_04_D09	60592	SCOC	NM_032547.1	52	116	class1	IR_92
29970	SCHIP1	NM_014575	306	486	IVV_S20060609_7TH_C10_01_A03	60592	SCOC	NM_032547.1	52	87	class1	IR_92
29970	SCHIP1	NM_014575	306	486	IVV_S20060609_7TH_C10_01_A05	60592	SCOC	NM_032547.1	54	87	class1	IR_92
29970	SCHIP1	NM_014575	306	486	IVV_S20060609_7TH_C10_01_B06	60592	SCOC	NM_032547.1	52	116	class1	IR_92
29970	SCHIP1	NM_014575	306	486	IVV_S20060609_7TH_C10_01_D02	60592	SCOC	NM_032547.1	52	117	class1	IR_92
29970	SCHIP1	NM_014575	306	486	IVV_S20060609_7TH_C10_02_A05	60592	SCOC	NM_032547.1	56	95	class1	IR_92
29970	SCHIP1	NM_014575	306	486	IVV_S20060609_7TH_C10_02_E01	60592	SCOC	NM_032547.1	52	116	class1	IR_92
29970	SCHIP1	NM_014575	306	486	IVV_S20060609_7TH_C10_02_G04	60592	SCOC	NM_032547.1	51	86	class1	IR_92
29970	SCHIP1	NM_014575	306	486	IVV_S20060609_7TH_C10_02_G09	60592	SCOC	NM_032547.1	59	117	class1	IR_92
29970	SCHIP1	NM_014575	306	486	IVV_S20060609_7TH_C10_02_H03	60592	SCOC	NM_032547.1	52	116	class1	IR_92
29970	SCHIP1	NM_014575	306	486	IVV_S20060609_7TH_C10_03_A04	60592	SCOC	NM_032547.1	52	117	class1	IR_92
29970	SCHIP1	NM_014575	306	486	IVV_S20060609_7TH_C10_03_C08	60592	SCOC	NM_032547.1	47	117	class1	IR_92
29970	SCHIP1	NM_014575	306	486	IVV_S20060609_7TH_C10_03_F01	60592	SCOC	NM_032547.1	52	117	class1	IR_92
29970	SCHIP1	NM_014575	306	486	IVV_S20060609_7TH_C10_03_H12	60592	SCOC	NM_032547.1	56	86	class1	IR_92
29970	SCHIP1	NM_014575	306	486	IVV_S20060609_7TH_C10_04_B03	60592	SCOC	NM_032547.1	56	86	class1	IR_92
29970	SCHIP1	NM_014575	306	486	IVV_S20060609_7TH_C10_04_C06	60592	SCOC	NM_032547.1	46	118	class1	IR_92
29970	SCHIP1	NM_014575	306	486	IVV_S20060609_7TH_C10_04_G10	60592	SCOC	NM_032547.1	52	87	class1	IR_92
29970	SCHIP1	NM_014575	306	486	IVV_S20060609_7TH_C10_04_H08	60592	SCOC	NM_032547.1	56	86	class1	IR_92
29970	SCHIP1	NM_014575	306	486	IVV_S20060609_7TH_C10_04_H10	60592	SCOC	NM_032547.1	52	117	class1	IR_92
29970	SCHIP1	NM_014575	1	487	IVV_S20060609_7TH_C5_01_A02	60592	SCOC	NM_032547.1	56	87	class1	IR_92
29970	SCHIP1	NM_014575	1	487	IVV_S20060609_7TH_C5_01_A03	60592	SCOC	NM_032547.1	56	87	class1	IR_92
29970	SCHIP1	NM_014575	1	487	IVV_S20060609_7TH_C5_01_A09	60592	SCOC	NM_032547.1	58	116	class1	IR_92
29970	SCHIP1	NM_014575	1	487	IVV_S20060609_7TH_C5_01_B06	60592	SCOC	NM_032547.1	56	87	class1	IR_92
29970	SCHIP1	NM_014575	1	487	IVV_S20060609_7TH_C5_01_B11	60592	SCOC	NM_032547.1	56	87	class1	IR_92
29970	SCHIP1	NM_014575	1	487	IVV_S20060609_7TH_C5_01_C06	60592	SCOC	NM_032547.1	56	87	class1	IR_92
29970	SCHIP1	NM_014575	1	487	IVV_S20060609_7TH_C5_01_C07	60592	SCOC	NM_032547.1	56	87	class1	IR_92
29970	SCHIP1	NM_014575	1	487	IVV_S20060609_7TH_C5_01_C08	60592	SCOC	NM_032547.1	56	87	class1	IR_92
29970	SCHIP1	NM_014575	1	487	IVV_S20060609_7TH_C5_01_C09	60592	SCOC	NM_032547.1	56	87	class1	IR_92
29970	SCHIP1	NM_014575	1	487	IVV_S20060609_7TH_C5_01_C10	60592	SCOC	NM_032547.1	58	116	class1	IR_92
29970	SCHIP1	NM_014575	1	487	IVV_S20060609_7TH_C5_01_D04	60592	SCOC	NM_032547.1	56	87	class1	IR_92
29970	SCHIP1	NM_014575	1	487	IVV_S20060609_7TH_C5_01_D06	60592	SCOC	NM_032547.1	56	87	class1	IR_92
29970	SCHIP1	NM_014575	1	487	IVV_S20060609_7TH_C5_01_D07	60592	SCOC	NM_032547.1	56	87	class1	IR_92
29970	SCHIP1	NM_014575	1	487	IVV_S20060609_7TH_C5_01_D09	60592	SCOC	NM_032547.1	56	87	class1	IR_92
29970	SCHIP1	NM_014575	1	487	IVV_S20060609_7TH_C5_01_E05	60592	SCOC	NM_032547.1	46	116	class1	IR_92
29970	SCHIP1	NM_014575	1	487	IVV_S20060609_7TH_C5_01_E06	60592	SCOC	NM_032547.1	56	87	class1	IR_92
29970	SCHIP1	NM_014575	1	487	IVV_S20060609_7TH_C5_01_E08	60592	SCOC	NM_032547.1	56	87	class1	IR_92
29970	SCHIP1	NM_014575	1	487	IVV_S20060609_7TH_C5_01_E12	60592	SCOC	NM_032547.1	55	116	class1	IR_92
29970	SCHIP1	NM_014575	1	487	IVV_S20060609_7TH_C5_01_F01	60592	SCOC	NM_032547.1	46	116	class1	IR_92
29970	SCHIP1	NM_014575	1	487	IVV_S20060609_7TH_C5_01_F02	60592	SCOC	NM_032547.1	56	87	class1	IR_92
29970	SCHIP1	NM_014575	1	487	IVV_S20060609_7TH_C5_01_F04	60592	SCOC	NM_032547.1	56	87	class1	IR_92
29970	SCHIP1	NM_014575	1	487	IVV_S20060609_7TH_C5_01_F08	60592	SCOC	NM_032547.1	46	116	class1	IR_92
29970	SCHIP1	NM_014575	1	487	IVV_S20060609_7TH_C5_01_G05	60592	SCOC	NM_032547.1	56	87	class1	IR_92
29970	SCHIP1	NM_014575	1	487	IVV_S20060609_7TH_C5_01_G07	60592	SCOC	NM_032547.1	56	87	class1	IR_92
29970	SCHIP1	NM_014575	1	487	IVV_S20060609_7TH_C5_01_G10	60592	SCOC	NM_032547.1	56	87	class1	IR_92
29970	SCHIP1	NM_014575	1	487	IVV_S20060609_7TH_C5_01_H03	60592	SCOC	NM_032547.1	56	87	class1	IR_92
29970	SCHIP1	NM_014575	1	487	IVV_S20060609_7TH_C5_01_H05	60592	SCOC	NM_032547.1	59	77	class1	IR_92
29970	SCHIP1	NM_014575	1	487	IVV_S20060609_7TH_C5_01_H07	60592	SCOC	NM_032547.1	56	87	class1	IR_92
29970	SCHIP1	NM_014575	1	487	IVV_S20060609_7TH_C5_02_A03	60592	SCOC	NM_032547.1	56	87	class1	IR_92
29970	SCHIP1	NM_014575	1	487	IVV_S20060609_7TH_C5_02_A06	60592	SCOC	NM_032547.1	56	87	class1	IR_92
29970	SCHIP1	NM_014575	1	487	IVV_S20060609_7TH_C5_02_B03	60592	SCOC	NM_032547.1	56	87	class1	IR_92
29970	SCHIP1	NM_014575	1	487	IVV_S20060609_7TH_C5_02_B05	60592	SCOC	NM_032547.1	56	87	class1	IR_92
29970	SCHIP1	NM_014575	1	487	IVV_S20060609_7TH_C5_02_B11	60592	SCOC	NM_032547.1	56	87	class1	IR_92
29970	SCHIP1	NM_014575	1	487	IVV_S20060609_7TH_C5_02_C07	60592	SCOC	NM_032547.1	57	122	class1	IR_92
29970	SCHIP1	NM_014575	1	487	IVV_S20060609_7TH_C5_02_C10	60592	SCOC	NM_032547.1	56	87	class1	IR_92
29970	SCHIP1	NM_014575	1	487	IVV_S20060609_7TH_C5_02_C11	60592	SCOC	NM_032547.1	44	95	class1	IR_92
29970	SCHIP1	NM_014575	1	487	IVV_S20060609_7TH_C5_02_D02	60592	SCOC	NM_032547.1	56	87	class1	IR_92
29970	SCHIP1	NM_014575	1	487	IVV_S20060609_7TH_C5_02_D07	60592	SCOC	NM_032547.1	56	87	class1	IR_92
29970	SCHIP1	NM_014575	1	487	IVV_S20060609_7TH_C5_02_D09	60592	SCOC	NM_032547.1	56	87	class1	IR_92
29970	SCHIP1	NM_014575	1	487	IVV_S20060609_7TH_C5_02_D12	60592	SCOC	NM_032547.1	52	116	class1	IR_92
29970	SCHIP1	NM_014575	1	487	IVV_S20060609_7TH_C5_02_E03	60592	SCOC	NM_032547.1	56	87	class1	IR_92
29970	SCHIP1	NM_014575	1	487	IVV_S20060609_7TH_C5_02_E05	60592	SCOC	NM_032547.1	56	87	class1	IR_92
29970	SCHIP1	NM_014575	1	487	IVV_S20060609_7TH_C5_02_G02	60592	SCOC	NM_032547.1	56	87	class1	IR_92
29970	SCHIP1	NM_014575	1	487	IVV_S20060609_7TH_C5_02_G11	60592	SCOC	NM_032547.1	53	118	class1	IR_92
29970	SCHIP1	NM_014575	1	487	IVV_S20060609_7TH_C5_02_H05	60592	SCOC	NM_032547.1	56	87	class1	IR_92
29970	SCHIP1	NM_014575	1	487	IVV_S20060609_7TH_C5_02_H07	60592	SCOC	NM_032547.1	58	87	class1	IR_92
29970	SCHIP1	NM_014575	1	487	IVV_S20060609_7TH_C5_02_H08	60592	SCOC	NM_032547.1	58	116	class1	IR_92
29970	SCHIP1	NM_014575	1	487	IVV_S20060609_7TH_C5_03_A02	60592	SCOC	NM_032547.1	46	116	class1	IR_92
29970	SCHIP1	NM_014575	1	487	IVV_S20060609_7TH_C5_03_A06	60592	SCOC	NM_032547.1	56	87	class1	IR_92
29970	SCHIP1	NM_014575	1	487	IVV_S20060609_7TH_C5_03_A10	60592	SCOC	NM_032547.1	52	116	class1	IR_92
29970	SCHIP1	NM_014575	1	487	IVV_S20060609_7TH_C5_03_A11	60592	SCOC	NM_032547.1	56	87	class1	IR_92
29970	SCHIP1	NM_014575	1	487	IVV_S20060609_7TH_C5_03_B02	60592	SCOC	NM_032547.1	56	87	class1	IR_92
29970	SCHIP1	NM_014575	1	487	IVV_S20060609_7TH_C5_03_B03	60592	SCOC	NM_032547.1	56	87	class1	IR_92
29970	SCHIP1	NM_014575	1	487	IVV_S20060609_7TH_C5_03_B06	60592	SCOC	NM_032547.1	56	87	class1	IR_92
29970	SCHIP1	NM_014575	1	487	IVV_S20060609_7TH_C5_03_B07	60592	SCOC	NM_032547.1	56	87	class1	IR_92
29970	SCHIP1	NM_014575	1	487	IVV_S20060609_7TH_C5_03_C01	60592	SCOC	NM_032547.1	58	116	class1	IR_92
29970	SCHIP1	NM_014575	1	487	IVV_S20060609_7TH_C5_03_C05	60592	SCOC	NM_032547.1	56	87	class1	IR_92
29970	SCHIP1	NM_014575	1	487	IVV_S20060609_7TH_C5_03_C06	60592	SCOC	NM_032547.1	56	87	class1	IR_92
29970	SCHIP1	NM_014575	1	487	IVV_S20060609_7TH_C5_03_C08	60592	SCOC	NM_032547.1	56	87	class1	IR_92
29970	SCHIP1	NM_014575	1	487	IVV_S20060609_7TH_C5_03_C09	60592	SCOC	NM_032547.1	56	87	class1	IR_92
29970	SCHIP1	NM_014575	1	487	IVV_S20060609_7TH_C5_03_C11	60592	SCOC	NM_032547.1	56	77	class1	IR_92
29970	SCHIP1	NM_014575	1	487	IVV_S20060609_7TH_C5_03_C12	60592	SCOC	NM_032547.1	56	87	class1	IR_92
29970	SCHIP1	NM_014575	1	487	IVV_S20060609_7TH_C5_03_D02	60592	SCOC	NM_032547.1	56	87	class1	IR_92
29970	SCHIP1	NM_014575	1	487	IVV_S20060609_7TH_C5_03_D03	60592	SCOC	NM_032547.1	56	87	class1	IR_92
29970	SCHIP1	NM_014575	1	487	IVV_S20060609_7TH_C5_03_D09	60592	SCOC	NM_032547.1	59	117	class1	IR_92
29970	SCHIP1	NM_014575	1	487	IVV_S20060609_7TH_C5_03_E01	60592	SCOC	NM_032547.1	55	116	class1	IR_92
29970	SCHIP1	NM_014575	1	487	IVV_S20060609_7TH_C5_03_E04	60592	SCOC	NM_032547.1	56	87	class1	IR_92
29970	SCHIP1	NM_014575	1	487	IVV_S20060609_7TH_C5_03_E06	60592	SCOC	NM_032547.1	56	87	class1	IR_92
29970	SCHIP1	NM_014575	1	487	IVV_S20060609_7TH_C5_03_E08	60592	SCOC	NM_032547.1	56	87	class1	IR_92
29970	SCHIP1	NM_014575	1	487	IVV_S20060609_7TH_C5_03_E12	60592	SCOC	NM_032547.1	56	87	class1	IR_92
29970	SCHIP1	NM_014575	1	487	IVV_S20060609_7TH_C5_03_F09	60592	SCOC	NM_032547.1	56	87	class1	IR_92
29970	SCHIP1	NM_014575	1	487	IVV_S20060609_7TH_C5_03_F10	60592	SCOC	NM_032547.1	56	87	class1	IR_92
29970	SCHIP1	NM_014575	1	487	IVV_S20060609_7TH_C5_03_F11	60592	SCOC	NM_032547.1	58	115	class1	IR_92
29970	SCHIP1	NM_014575	1	487	IVV_S20060609_7TH_C5_03_F12	60592	SCOC	NM_032547.1	56	87	class1	IR_92
29970	SCHIP1	NM_014575	1	487	IVV_S20060609_7TH_C5_03_G02	60592	SCOC	NM_032547.1	56	87	class1	IR_92
29970	SCHIP1	NM_014575	1	487	IVV_S20060609_7TH_C5_03_G04	60592	SCOC	NM_032547.1	56	87	class1	IR_92
29970	SCHIP1	NM_014575	1	487	IVV_S20060609_7TH_C5_03_G06	60592	SCOC	NM_032547.1	44	95	class1	IR_92
29970	SCHIP1	NM_014575	1	487	IVV_S20060609_7TH_C5_03_G09	60592	SCOC	NM_032547.1	56	87	class1	IR_92
29970	SCHIP1	NM_014575	1	487	IVV_S20060609_7TH_C5_03_G10	60592	SCOC	NM_032547.1	58	116	class1	IR_92
29970	SCHIP1	NM_014575	1	487	IVV_S20060609_7TH_C5_03_H03	60592	SCOC	NM_032547.1	56	87	class1	IR_92
29970	SCHIP1	NM_014575	1	487	IVV_S20060609_7TH_C5_03_H10	60592	SCOC	NM_032547.1	56	87	class1	IR_92
29970	SCHIP1	NM_014575	1	487	IVV_S20060609_7TH_C5_04_A02	60592	SCOC	NM_032547.1	56	87	class1	IR_92
29970	SCHIP1	NM_014575	1	487	IVV_S20060609_7TH_C5_04_A06	60592	SCOC	NM_032547.1	56	87	class1	IR_92
29970	SCHIP1	NM_014575	1	487	IVV_S20060609_7TH_C5_04_A11	60592	SCOC	NM_032547.1	56	87	class1	IR_92
29970	SCHIP1	NM_014575	1	487	IVV_S20060609_7TH_C5_04_A12	60592	SCOC	NM_032547.1	56	87	class1	IR_92
29970	SCHIP1	NM_014575	1	487	IVV_S20060609_7TH_C5_04_B07	60592	SCOC	NM_032547.1	56	87	class1	IR_92
29970	SCHIP1	NM_014575	1	487	IVV_S20060609_7TH_C5_04_B08	60592	SCOC	NM_032547.1	56	87	class1	IR_92
29970	SCHIP1	NM_014575	1	487	IVV_S20060609_7TH_C5_04_C06	60592	SCOC	NM_032547.1	56	87	class1	IR_92
29970	SCHIP1	NM_014575	1	487	IVV_S20060609_7TH_C5_04_C08	60592	SCOC	NM_032547.1	56	87	class1	IR_92
29970	SCHIP1	NM_014575	1	487	IVV_S20060609_7TH_C5_04_C10	60592	SCOC	NM_032547.1	47	77	class1	IR_92
29970	SCHIP1	NM_014575	1	487	IVV_S20060609_7TH_C5_04_D05	60592	SCOC	NM_032547.1	52	118	class1	IR_92
29970	SCHIP1	NM_014575	1	487	IVV_S20060609_7TH_C5_04_D06	60592	SCOC	NM_032547.1	56	87	class1	IR_92
29970	SCHIP1	NM_014575	1	487	IVV_S20060609_7TH_C5_04_D08	60592	SCOC	NM_032547.1	56	87	class1	IR_92
29970	SCHIP1	NM_014575	1	487	IVV_S20060609_7TH_C5_04_D12	60592	SCOC	NM_032547.1	56	87	class1	IR_92
29970	SCHIP1	NM_014575	1	487	IVV_S20060609_7TH_C5_04_E04	60592	SCOC	NM_032547.1	56	87	class1	IR_92
29970	SCHIP1	NM_014575	1	487	IVV_S20060609_7TH_C5_04_E10	60592	SCOC	NM_032547.1	56	87	class1	IR_92
29970	SCHIP1	NM_014575	1	487	IVV_S20060609_7TH_C5_04_F10	60592	SCOC	NM_032547.1	52	116	class1	IR_92
29970	SCHIP1	NM_014575	1	487	IVV_S20060609_7TH_C5_04_F11	60592	SCOC	NM_032547.1	56	87	class1	IR_92
29970	SCHIP1	NM_014575	1	487	IVV_S20060609_7TH_C5_04_G02	60592	SCOC	NM_032547.1	52	116	class1	IR_92
29970	SCHIP1	NM_014575	1	487	IVV_S20060609_7TH_C5_04_G03	60592	SCOC	NM_032547.1	56	87	class1	IR_92
29970	SCHIP1	NM_014575	1	487	IVV_S20060609_7TH_C5_04_G05	60592	SCOC	NM_032547.1	56	87	class1	IR_92
29970	SCHIP1	NM_014575	1	487	IVV_S20060609_7TH_C5_04_G08	60592	SCOC	NM_032547.1	56	87	class1	IR_92
29970	SCHIP1	NM_014575	1	487	IVV_S20060609_7TH_C5_04_H04	60592	SCOC	NM_032547.1	56	87	class1	IR_92
29970	SCHIP1	NM_014575	1	487	IVV_S20060609_7TH_C5_04_H05	60592	SCOC	NM_032547.1	46	77	class1	IR_92
29970	SCHIP1	NM_014575	1	487	IVV_S20060609_7TH_C5_04_H06	60592	SCOC	NM_032547.1	56	87	class1	IR_92
29970	SCHIP1	NM_014575	1	487	IVV_S20060609_7TH_C5_04_H10	60592	SCOC	NM_032547.1	56	87	class1	IR_92
29970	SCHIP1	NM_014575	1	487	IVV_S20060609_7TH_C5_04_H11	60592	SCOC	NM_032547.1	51	117	class1	IR_92
29970	SCHIP1	NM_014575	1	487	IVV_S20051122_C05_04_C09	10565	ARFGEF1	NM_006421.3	879	888	class2	IR_100
29970	SCHIP1	NM_014575	1	487	IVV_S20051122_C05_04_G10	29970	SCHIP1	NM_014575.1	427	437	class2	IR_101
29970	SCHIP1	NM_014575	306	486	IVV_S20051122_C10_02_D05	29953	TRHDE	NM_013381.1	995	1005	class2	IR_105
29970	SCHIP1	NM_014575	306	486	IVV_S20051122_C10_02_G07	6801	STRN	NM_003162.2	242	257	class2	IR_106
29970	SCHIP1	NM_014575	306	486	IVV_S20051122_C10_03_A10	55827	IQWD1	NM_018442.2	868	879	class2	IR_107
29970	SCHIP1	NM_014575	306	486	IVV_S20051122_C10_03_E01	26054	SENP6	NM_015571.1	990	1004	class2	IR_108
29970	SCHIP1	NM_014575	306	486	IVV_S20051122_C10_04_F05	2495	FTH1	NM_002032.2	165	174	class2	IR_110
29970	SCHIP1	NM_014575	306	486	IVV_S20051122_C10_04_F10	8237	USP11	NM_004651.3	652	662	class2	IR_111
29970	SCHIP1	NM_014575	306	486	IVV_S20051122_C10_04_G12	4673	NAP1L1	NM_139207.1	346	357	class2	IR_112
29970	SCHIP1	NM_014575	402	479	IVV_S20051122_D10_02_B07	5710	PSMD4	NM_002810.2	353	375	class2	IR_123
29970	SCHIP1	NM_014575	402	479	IVV_S20051122_D10_02_E07	10598	AHSA1	NM_012111.1	46	60	class2	IR_124
29970	SCHIP1	NM_014575	402	479	IVV_S20051122_D10_03_B05	4685	NCAM2	NM_004540.2	182	193	class2	IR_125
29970	SCHIP1	NM_014575	402	479	IVV_S20051122_D10_03_G11	4131	MAP1B	NM_005909.2	847	864	class2	IR_126
29970	SCHIP1	NM_014575	402	479	IVV_S20051122_D10_04_C07	55193	PB1	NM_018313.3	900	921	class2	IR_127
29970	SCHIP1	NM_014575	402	479	IVV_S20060609_5TH_D10_02_A11	6546	SLC8A1	NM_021097.2	549	563	class2	IR_258
29970	SCHIP1	NM_014575	402	479	IVV_S20060609_5TH_D10_02_G01	55719	C10orf6	NM_018121.2	513	525	class2	IR_260
29970	SCHIP1	NM_014575	402	479	IVV_S20060609_5TH_D10_04_F02	8925	HERC1	NM_003922.2	2261	2279	class2	IR_261
29970	SCHIP1	NM_014575	306	486	IVV_S20060609_7TH_C10_01_B05	805	CALM2	NM_001743.3	22	32	class2	IR_485
29970	SCHIP1	NM_014575	306	486	IVV_S20060609_7TH_C10_02_H02	26019	UPF2	NM_080599.1	70	101	class2	IR_486
29970	SCHIP1	NM_014575	306	486	IVV_S20060609_7TH_C10_03_C07	23770	FKBP8	NM_012181.3	26	43	class2	IR_487
29970	SCHIP1	NM_014575	306	486	IVV_S20060609_7TH_C10_04_B02	51602	NOP5/NOP58	NM_015934.3	470	490	class2	IR_488
29970	SCHIP1	NM_014575	1	487	IVV_S20060609_7TH_C5_03_A01	2957	GTF2A1	NM_015859.2	285	297	class2	IR_504
29970	SCHIP1	NM_014575	1	487	IVV_S20060609_7TH_C5_03_H02	4133	MAP2	NM_002374.3	260	269	class2	IR_505
29970	SCHIP1	NM_014575	1	487	IVV_S20060609_7TH_C5_04_A01	11124	FAF1	NM_007051.2	485	508	class2	IR_506
29970	SCHIP1	NM_014575	1	487	IVV_S20060609_7TH_C5_04_B09	92689	FAM114A1	NM_138389.1	346	361	class2	IR_507
29970	SCHIP1	NM_014575	306	486	IVV_T051018_C10_E06	51650	MRPS33	NM_016071.2	82	98	class2	IR_663
29970	SCHIP1	NM_014575	306	486	IVV_T051018_C10_H04	404734	MASK-BP3	NM_020690.4	1456	1471	class2	IR_664
29970	SCHIP1	NM_014575	306	486	IVV_T051018_C10_M01	11188	NISCH	NM_007184.2	81	90	class2	IR_665
29970	SCHIP1	NM_014575	306	486	IVV_T051018_C10_N14	9839	ZFHX1B	NM_014795.2	25	42	class2	IR_667
29970	SCHIP1	NM_014575	306	486	IVV_T051018_C10_P21	10270	AKAP8	NM_005858.2	349	372	class2	IR_668
29970	SCHIP1	NM_014575	1	487	IVV_T051018_C5_G15	23091	ZC3H13	NM_015070.3	1336	1357	class2	IR_680
29970	SCHIP1	NM_014575	1	487	IVV_T051018_C5_H10	7415	VCP	NM_007126.2	55	65	class2	IR_681
29970	SCHIP1	NM_014575	402	479	IVV_T051018_D10_A01	6741	SSB	NM_003142.2	300	312	class2	IR_686
29970	SCHIP1	NM_014575	402	479	IVV_T051018_D10_A04	11162	NUDT6	NM_007083.3	162	176	class2	IR_687
29970	SCHIP1	NM_014575	402	479	IVV_T051018_D10_D20	353355	ZNF233	NM_181756.1	505	532	class2	IR_688
29970	SCHIP1	NM_014575	402	479	IVV_T051018_D10_J15	3306	HSPA2	NM_021979.2	508	526	class2	IR_689
29970	SCHIP1	NM_014575	402	479	IVV_T051018_D10_L17	4747	NEFL	NM_006158.2	373	398	class2	IR_690
29970	SCHIP1	NM_014575	1	487	IVV_S20051122_C05_01_H06	51735	RAPGEF6	NM_016340.3	258	267	class2	IR_93
29970	SCHIP1	NM_014575	1	487	IVV_S20051122_C05_02_C04	84991	RBM17	NM_032905.3	98	150	class2	IR_94
[truncated: 804 more rows]
