# Supplementary material for: A Comprehensive Resource of Interacting Protein Regions for Refining Human Transcription Factor Networks
Source: PLoS One. 2010 Feb 24;5(2):e9289. doi: 10.1371/journal.pone.0009289 (PMC2827538; doi:10.1371/journal.pone.0009289)
Supplement: Table S7 — List of interacting protein pairs related to the 50 human TFs. (0.25 MB XLS) [file pone.0009289.s020.xls]

## Sheet: Table S8a
Table S7 List of interacting protein pairs related to the 50 TFs
GeneID	Symbol	GeneID	Symbol	LC	IVV
7803	PTP4A1	11016	ATF7	1
1588	CYP19A1	3725	JUN	1
1588	CYP19A1	3727	JUND	1
4869	NPM1	7157	TP53	1
1050	CEBPA	6927	TCF1	1
1050	CEBPA	1499	CTNNB1	1
1050	CEBPA	2908	NR3C1	1
1050	CEBPA	1386	ATF2	1
1050	CEBPA	4609	MYC	1
580	BARD1	7157	TP53	1
580	BARD1	1869	E2F1	1
1387	CREBBP	3725	JUN	1
1387	CREBBP	6927	TCF1	1
1387	CREBBP	4087	SMAD2	1
1387	CREBBP	2908	NR3C1	1
1387	CREBBP	4602	MYB	1
1387	CREBBP	7157	TP53	1
1020	CDK5	1499	CTNNB1	1
2516	NR5A1	3725	JUN	1
2516	NR5A1	6667	SP1	1
4361	MRE11A	7157	TP53	1
2969	GTF2I	4609	MYC	1
1021	CDK6	5925	RB1	1
7080	TITF1	7849	PAX8	1
1263	PLK3	7157	TP53	1
578	BAK1	7157	TP53	1
6595	SMARCA2	6760	SS18	1
2551	GABPA	6667	SP1	1
3312	HSPA8	5925	RB1	1
3312	HSPA8	4790	NFKB1	1
3312	HSPA8	6667	SP1	1
3312	HSPA8	7157	TP53	1
7022	TFAP2C	7157	TP53	1
675	BRCA2	7157	TP53	1
4087	SMAD2	4739	NEDD9	1
4087	SMAD2	7046	TGFBR1	1
4087	SMAD2	4205	MEF2A	1
4087	SMAD2	9372	ZFYVE9	1
4087	SMAD2	6497	SKI	1
4087	SMAD2	22938	SNW1	1
4087	SMAD2	4609	MYC	1
4087	SMAD2	10393	ANAPC10	1
4087	SMAD2	6935	TCF8	1
4087	SMAD2	9972	NUP153	1
4087	SMAD2	9392	TGFBRAP1	1
4087	SMAD2	11171	STRAP	1
4087	SMAD2	6667	SP1	1
4087	SMAD2	7050	TGIF	1
4087	SMAD2	79753	SNIP1	1
4087	SMAD2	163126	CRI2	1
4087	SMAD2	8928	FOXH1	1
4087	SMAD2	55914	ERBB2IP	1
4087	SMAD2	64750	SMURF2	1
4087	SMAD2	8021	NUP214	1
4087	SMAD2	4088	SMAD3	1
4087	SMAD2	6498	SKIL	1
4087	SMAD2	10401	PIAS3	1
4087	SMAD2	51176	LEF1	1
4087	SMAD2	8881	CDC16	1
4087	SMAD2	5933	RBL1	1
4087	SMAD2	23592	LEMD3	1
4087	SMAD2	28996	HIPK2	1
4087	SMAD2	7554	ZNF8	1
4087	SMAD2	8312	AXIN1	1
4087	SMAD2	51586	PCQAP	1
4087	SMAD2	5371	PML	1
4087	SMAD2	4802	NFYC	1
4087	SMAD2	10140	TOB1	1
4087	SMAD2	4089	SMAD4	1
4087	SMAD2	56288	PARD3	1
4087	SMAD2	9839	ZFHX1B	1
4087	SMAD2	4208	MEF2C	1
1615	DARS	1936	EEF1D	1
3065	HDAC1	5925	RB1	1
3065	HDAC1	4087	SMAD2	1
3065	HDAC1	4193	MDM2	1
3065	HDAC1	5245	PHB	1
3065	HDAC1	4790	NFKB1	1
3065	HDAC1	6667	SP1	1
2932	GSK3B	4790	NFKB1	1
2932	GSK3B	7157	TP53	1
527	ATP6V0C	29956	LASS2	1
861	RUNX1	3725	JUN	1
861	RUNX1	865	CBFB	1
861	RUNX1	2353	FOS	1
1870	E2F2	5925	RB1	1
1870	E2F2	6667	SP1	1
3172	HNF4A	6927	TCF1	1
3172	HNF4A	4087	SMAD2	1
3172	HNF4A	7157	TP53	1
6749	SSRP1	6927	TCF1	1
4208	MEF2C	6667	SP1	1
3146	HMGB1	5925	RB1	1
3146	HMGB1	4790	NFKB1	1
3146	HMGB1	7157	TP53	1
4913	NTHL1	7157	TP53	1
3276	PRMT1	7157	TP53	1
1660	DHX9	3725	JUN	1
7155	TOP2B	7157	TP53	1
4000	LMNA	5925	RB1	1
1999	ELF3	6880	TAF9	1
1999	ELF3	4790	NFKB1	1
3725	JUN	5599	MAPK8	1
3725	JUN	6942	TCF20	1
3725	JUN	6872	TAF1	1
3725	JUN	6908	TBP	1
3725	JUN	122953	JDP2	1
3725	JUN	4666	NACA	1
3725	JUN	5449	POU1F1	1
3725	JUN	9586	CREB5	1
3725	JUN	7329	UBE2I	1
3725	JUN	6689	SPIB	1
3725	JUN	6497	SKI	1
3725	JUN	3725	JUN	1
3725	JUN	5891	RAGE	1
3725	JUN	7153	TOP2A	1
3725	JUN	8554	PIAS1	1
3725	JUN	5925	RB1	1
3725	JUN	5300	PIN1	1
3725	JUN	3726	JUNB	1
3725	JUN	5601	MAPK9	1
3725	JUN	5600	MAPK11	1
3725	JUN	55294	FBXW7	1
3725	JUN	6774	STAT3	1
3725	JUN	5970	RELA	1
3725	JUN	4094	MAF	1
3725	JUN	6688	SPI1	1
3725	JUN	8204	NRIP1	1
3725	JUN	9325	TRIP4	1
3725	JUN	4670	HNRPM	1
3725	JUN	25920	COBRA1	1
3725	JUN	6667	SP1	1
3725	JUN	7050	TGIF	1
3725	JUN	9188	DDX21	1
3725	JUN	7169	TPM2	1
3725	JUN	6775	STAT4	1
3725	JUN	51177	PLEKHO1	1
3725	JUN	8841	HDAC3	1
3725	JUN	8550	MAPKAPK5	1
3725	JUN	4779	NFE2L1	1
3725	JUN	54861	SNRK	1
3725	JUN	55690	PACS1	1
3725	JUN	6142	RPL18A	1
3725	JUN	10538	BATF	1
3725	JUN	5595	MAPK3	1
3725	JUN	7421	VDR	1
3725	JUN	4088	SMAD3	1
3725	JUN	64326	RFWD2	1
3725	JUN	4087	SMAD2	1	1
3725	JUN	10514	MYBBP1A	1
3725	JUN	10987	COPS5	1
3725	JUN	5371	PML	1
3725	JUN	6772	STAT1	1
3725	JUN	8570	KHSRP	1
3725	JUN	4654	MYOD1	1
3725	JUN	8648	NCOA1	1
3725	JUN	7533	YWHAH	1
3725	JUN	5602	MAPK10	1
3725	JUN	8061	FOSL1	1
3725	JUN	9584	RNPC2	1
3725	JUN	4089	SMAD4	1
3725	JUN	5587	PRKD1	1
3725	JUN	6602	SMARCD1	1
2314	FLII	10133	OPTN	1
5601	MAPK9	5925	RB1	1
5601	MAPK9	11016	ATF7	1
5601	MAPK9	7157	TP53	1
4687	NCF1	4790	NFKB1	1
4602	MYB	8458	TTF2	1
4602	MYB	51701	NLK	1
4602	MYB	27044	SND1	1
4602	MYB	10514	MYBBP1A	1
4602	MYB	7329	UBE2I	1
4602	MYB	5079	PAX5	1
4602	MYB	5371	PML	1
2976	GTF3C2	5925	RB1	1
993	CDC25A	1869	E2F1	1
4350	MPG	5468	PPARG	1
2002	ELK1	2353	FOS	1
2114	ETS2	3725	JUN	1
2114	ETS2	2908	NR3C1	1
3064	HD	6667	SP1	1
3064	HD	10133	OPTN	1
3064	HD	7157	TP53	1
5888	RAD51	7157	TP53	1
1025	CDK9	4790	NFKB1	1
4692	NDN	64219	PJA1	1
4692	NDN	4925	NUCB2	1
4692	NDN	4804	NGFR	1
4692	NDN	4692	NDN	1
4692	NDN	7157	TP53	1
6790	AURKA	7157	TP53	1
9191	DEDD	162989	DEDD2	1
367	AR	3725	JUN	1
367	AR	5925	RB1	1
367	AR	4193	MDM2	1
367	AR	1499	CTNNB1	1
367	AR	2908	NR3C1	1
367	AR	5881	RAC3	1
367	AR	4790	NFKB1	1
367	AR	2963	GTF2F2	1
1000	CDH2	1499	CTNNB1	1
1760	DMPK	6667	SP1	1
2033	EP300	6760	SS18	1
2033	EP300	6927	TCF1	1
2033	EP300	4087	SMAD2	1
2033	EP300	4193	MDM2	1
2033	EP300	3164	NR4A1	1
2033	EP300	7157	TP53	1
2033	EP300	7291	TWIST1	1
2033	EP300	2113	ETS1	1
2033	EP300	4602	MYB	1
5599	MAPK8	7157	TP53	1
3732	CD82	4790	NFKB1	1
1460	CSNK2B	7157	TP53	1
324	APC	1499	CTNNB1	1
3303	HSPA1A	7157	TP53	1
6753	SSTR3	7157	TP53	1
1877	E4F1	7157	TP53	1
595	CCND1	5925	RB1	1
595	CCND1	1499	CTNNB1	1
5610	EIF2AK2	7157	TP53	1
999	CDH1	1499	CTNNB1	1
1854	DUT	5468	PPARG	1
1180	CLCN1	6667	SP1	1
835	CASP2	5925	RB1	1
4637	MYL6	4790	NFKB1	1
5970	RELA	7291	TWIST1	1
5970	RELA	6667	SP1	1
4094	MAF	4602	MYB	1
1386	ATF2	5599	MAPK8	1
1386	ATF2	122953	JDP2	1
1386	ATF2	8550	MAPKAPK5	1
1386	ATF2	1457	CSNK2A1	1
1386	ATF2	9586	CREB5	1
1386	ATF2	8721	EDF1	1
1386	ATF2	7329	UBE2I	1
1386	ATF2	1432	MAPK14	1
1386	ATF2	2353	FOS	1	1
1386	ATF2	5595	MAPK3	1
1386	ATF2	4683	NBN	1
1386	ATF2	4088	SMAD3	1
1386	ATF2	3725	JUN	1	1
1386	ATF2	5925	RB1	1
1386	ATF2	5601	MAPK9	1
1386	ATF2	2963	GTF2F2	1
1386	ATF2	8433	UTF1	1
1386	ATF2	5600	MAPK11	1
1386	ATF2	5603	MAPK13	1
1386	ATF2	10856	RUVBL2	1
1386	ATF2	3159	HMGA1	1
1386	ATF2	7528	YY1	1
1386	ATF2	4089	SMAD4	1
1386	ATF2	1459	CSNK2A2	1
25920	COBRA1	51497	TH1L	1
1871	E2F3	6667	SP1	1
4209	MEF2D	6667	SP1	1
1832	DSP	4790	NFKB1	1
5515	PPP2CA	7157	TP53	1
6880	TAF9	10629	TAF6L	1
6880	TAF9	7157	TP53	1
6880	TAF9	23450	SF3B3	1
2168	FABP1	5468	PPARG	1
405	ARNT	2963	GTF2F2	1
573	BAG1	2908	NR3C1	1
4656	MYOG	6667	SP1	1
6908	TBP	7157	TP53	1
2113	ETS1	3725	JUN	1	1
2113	ETS1	8202	NCOA3	1
2113	ETS1	6672	SP100	1
2113	ETS1	2114	ETS2	1
2113	ETS1	2908	NR3C1	1
2113	ETS1	4790	NFKB1	1
2113	ETS1	2625	GATA3	1
2113	ETS1	9611	NCOR1	1
2113	ETS1	7329	UBE2I	1
2113	ETS1	2353	FOS	1
2113	ETS1	4094	MAF	1
2113	ETS1	51567	TTRAP	1
2113	ETS1	6714	SRC	1
2113	ETS1	5079	PAX5	1
100	ADA	2908	NR3C1	1
914	CD2	6667	SP1	1
581	BAX	7157	TP53	1
4670	HNRPM	4790	NFKB1	1
6258	RXRG	6722	SRF	1
6258	RXRG	7068	THRB	1
2078	ERG	3725	JUN	1
2078	ERG	2353	FOS	1
607	BCL9	1499	CTNNB1	1
5295	PIK3R1	5925	RB1	1
2902	GRIN1	6667	SP1	1
3093	HIP2	4790	NFKB1	1
3093	HIP2	7157	TP53	1
1820	ARID3A	1869	E2F1	1
1820	ARID3A	7157	TP53	1
5308	PITX2	5308	PITX2	1
5308	PITX2	5626	PROP1	1
694	BTG1	3725	JUN	1
2874	GPS2	7157	TP53	1
213	ALB	6927	TCF1	1
5371	PML	5925	RB1	1
5371	PML	6667	SP1	1
5371	PML	7157	TP53	1
3148	HMGB2	7157	TP53	1
3159	HMGA1	3725	JUN	1
3159	HMGA1	6667	SP1	1
1457	CSNK2A1	3725	JUN	1
1457	CSNK2A1	1499	CTNNB1	1
1457	CSNK2A1	2353	FOS	1
1457	CSNK2A1	4609	MYC	1
1457	CSNK2A1	1936	EEF1D	1
1026	CDKN1A	5925	RB1	1
1026	CDKN1A	4609	MYC	1
1026	CDKN1A	6667	SP1	1
1026	CDKN1A	7157	TP53	1
3552	IL1A	4692	NDN	1
3727	JUND	5599	MAPK8	1
3727	JUND	64326	RFWD2	1
3727	JUND	6908	TBP	1
3727	JUND	122953	JDP2	1
3727	JUND	10987	COPS5	1
3727	JUND	51177	PLEKHO1	1
3727	JUND	5601	MAPK9	1
3727	JUND	4779	NFE2L1	1
3727	JUND	10538	BATF	1
3727	JUND	4221	MEN1	1
3727	JUND	4089	SMAD4	1
3727	JUND	4780	NFE2L2	1
4218	RAB8A	10133	OPTN	1
1499	CTNNB1	2898	GRIK2	1
1499	CTNNB1	3732	CD82	1
1499	CTNNB1	8826	IQGAP1	1
1499	CTNNB1	2064	ERBB2	1
1499	CTNNB1	5318	PKP2	1
1499	CTNNB1	6597	SMARCA4	1
1499	CTNNB1	10297	APC2	1
1499	CTNNB1	9231	DLG5	1
1499	CTNNB1	5300	PIN1	1
1499	CTNNB1	4790	NFKB1	1
1499	CTNNB1	3551	IKBKB	1
1499	CTNNB1	2516	NR5A1	1
1499	CTNNB1	1739	DLG1	1
1499	CTNNB1	30851	TAX1BP3	1
1499	CTNNB1	91653	BOC	1
1499	CTNNB1	5796	PTPRK	1
1499	CTNNB1	140825	NEURL2	1
1499	CTNNB1	1825	DSC3	1
1499	CTNNB1	25794	FSCN2	1
1499	CTNNB1	10076	PTPRU	1
1499	CTNNB1	55966	AJAP1	1
1499	CTNNB1	7430	VIL2	1
1499	CTNNB1	1857	DVL3	1
1499	CTNNB1	25776	PGEA1	1
1499	CTNNB1	26108	PYGO1	1
1499	CTNNB1	50937	CDON	1
1499	CTNNB1	8239	USP9X	1
1499	CTNNB1	4088	SMAD3	1
1499	CTNNB1	4582	MUC1	1
1499	CTNNB1	6927	TCF1	1
1499	CTNNB1	83439	TCF7L1	1
1499	CTNNB1	51176	LEF1	1
1499	CTNNB1	4087	SMAD2	1
1499	CTNNB1	5795	PTPRJ	1
1499	CTNNB1	8312	AXIN1	1
1499	CTNNB1	2932	GSK3B	1
1499	CTNNB1	1855	DVL1	1
1499	CTNNB1	9863	MAGI2	1
1499	CTNNB1	10672	GNA13	1
1499	CTNNB1	4089	SMAD4	1
1499	CTNNB1	5784	PTPN14	1
1499	CTNNB1	29119	CTNNA3	1
1499	CTNNB1	2308	FOXO1A	1
1499	CTNNB1	6929	TCF3	1
1499	CTNNB1	7046	TGFBR1	1
1499	CTNNB1	5175	PECAM1	1
1499	CTNNB1	5663	PSEN1	1
1499	CTNNB1	2309	FOXO3A	1
1499	CTNNB1	56998	CTNNBIP1	1
1499	CTNNB1	5770	PTPN1	1
1499	CTNNB1	5787	PTPRB	1
1499	CTNNB1	9368	SLC9A3R1	1
1499	CTNNB1	6925	TCF4	1
1499	CTNNB1	8313	AXIN2	1
1499	CTNNB1	5803	PTPRZ1	1
1499	CTNNB1	6446	SGK	1
1499	CTNNB1	3485	IGFBP2	1
1499	CTNNB1	4303	MLLT7	1
1499	CTNNB1	5295	PIK3R1	1
1499	CTNNB1	2902	GRIN1	1
1499	CTNNB1	2274	FHL2	1
1499	CTNNB1	55591	VEZT	1
1499	CTNNB1	9743	RICS	1
1499	CTNNB1	2494	NR5A2	1
1499	CTNNB1	6934	TCF7L2	1
1499	CTNNB1	1956	EGFR	1
1499	CTNNB1	22943	DKK1	1
1499	CTNNB1	7031	TFF1	1
1499	CTNNB1	5792	PTPRF	1
1499	CTNNB1	64403	CDH24	1
1499	CTNNB1	26281	FGF20	1
1499	CTNNB1	6907	TBL1X	1
1499	CTNNB1	10856	RUVBL2	1
1499	CTNNB1	2099	ESR1	1
1499	CTNNB1	8945	BTRC	1
1499	CTNNB1	50649	ARHGEF4	1
1499	CTNNB1	5310	PKD1	1
775	CACNA1C	5092	PCBD1	1
4286	MITF	5925	RB1	1
633	BGN	7124	TNF	1
7068	THRB	7157	TP53	1
3621	ING1	7157	TP53	1
468	ATF4	3725	JUN	1
468	ATF4	2963	GTF2F2	1
5468	PPARG	6258	RXRG	1
5468	PPARG	5468	PPARG	1
5468	PPARG	10912	GADD45G	1
5468	PPARG	8841	HDAC3	1
5468	PPARG	6256	RXRA	1
5468	PPARG	8721	EDF1	1
5468	PPARG	10902	BRD8	1
5468	PPARG	10286	BCAS2	1
5468	PPARG	23054	NCOA6	1
5468	PPARG	30836	DNTTIP2	1
5468	PPARG	9857	CEP350	1
5468	PPARG	8031	NCOA4	1
5468	PPARG	9862	THRAP4	1
5468	PPARG	8648	NCOA1	1
5468	PPARG	8431	NR0B2	1
5468	PPARG	10891	PPARGC1A	1
5468	PPARG	8204	NRIP1	1
5468	PPARG	5469	PPARBP	1
5468	PPARG	10499	NCOA2	1
1019	CDK4	5925	RB1	1
1019	CDK4	4087	SMAD2	1
1019	CDK4	4609	MYC	1
1380	CR2	7157	TP53	1
990	CDC6	4609	MYC	1
990	CDC6	1869	E2F1	1
672	BRCA1	3725	JUN	1
672	BRCA1	5925	RB1	1
672	BRCA1	4087	SMAD2	1
672	BRCA1	4609	MYC	1
672	BRCA1	3726	JUNB	1
672	BRCA1	4790	NFKB1	1
672	BRCA1	1869	E2F1	1
672	BRCA1	7157	TP53	1
672	BRCA1	6667	SP1	1
672	BRCA1	25920	COBRA1	1
672	BRCA1	3727	JUND	1
983	CDC2	1936	EEF1D	1
983	CDC2	1869	E2F1	1
983	CDC2	7157	TP53	1
4582	MUC1	7157	TP53	1
1107	CHD3	7157	TP53	1
3205	HOXA9	4087	SMAD2	1
1874	E2F4	5925	RB1	1
1874	E2F4	4087	SMAD2	1
1874	E2F4	4609	MYC	1
1874	E2F4	4692	NDN	1
1855	DVL1	4087	SMAD2	1
432	ASGR1	29956	LASS2	1
860	RUNX2	3725	JUN	1
860	RUNX2	5925	RB1	1
860	RUNX2	4087	SMAD2	1
860	RUNX2	865	CBFB	1
860	RUNX2	2353	FOS	1
860	RUNX2	2113	ETS1	1
5245	PHB	6597	SMARCA4	1
5245	PHB	5925	RB1	1
5245	PHB	6595	SMARCA2	1
5245	PHB	9611	NCOR1	1
5245	PHB	5934	RBL2	1
5245	PHB	5894	RAF1	1
1111	CHEK1	1869	E2F1	1
1111	CHEK1	7157	TP53	1
708	C1QBP	865	CBFB	1
5925	RB1	8850	PCAF	1
5925	RB1	9984	THOC1	1
5925	RB1	6872	TAF1	1
5925	RB1	6908	TBP	1
5925	RB1	10403	KNTC2	1
5925	RB1	7299	TYR	1
5925	RB1	6597	SMARCA4	1
5925	RB1	9643	MORF4L2	1
5925	RB1	9321	TRIP11	1
5925	RB1	7329	UBE2I	1
5925	RB1	6689	SPIB	1
5925	RB1	5929	RBBP5	1
5925	RB1	27043	PELP1	1
5925	RB1	6015	RING1	1
5925	RB1	6598	SMARCB1	1
5925	RB1	10933	MORF4L1	1
5925	RB1	132660	DKFZp686L1814	1
5925	RB1	286826	LIN9	1
5925	RB1	5925	RB1	1
5925	RB1	10902	BRD8	1
5925	RB1	26959	HBP1	1
5925	RB1	23054	NCOA6	1
5925	RB1	57786	RBAK	1
5925	RB1	8503	PIK3R3	1
5925	RB1	7052	TGM2	1
5925	RB1	5926	ARID4A	1
5925	RB1	6667	SP1	1
5925	RB1	7112	TMPO	1
5925	RB1	6670	SP3	1
5925	RB1	10741	RBBP9	1
5925	RB1	7704	ZBTB16	1
5925	RB1	5931	RBBP7	1
5925	RB1	26574	AATF	1
5925	RB1	8804	CREG1	1
5925	RB1	23741	CRI1	1
5925	RB1	5927	JARID1A	1
5925	RB1	54796	BNC2	1
5925	RB1	55814	BDP1	1
5925	RB1	8841	HDAC3	1
5925	RB1	6502	SKP2	1
5925	RB1	10399	GNB2L1	1
5925	RB1	8507	ENC1	1
5925	RB1	8575	PRKRA	1
5925	RB1	7422	VEGF	1
5925	RB1	7343	UBTF	1
5925	RB1	5932	RBBP8	1
5925	RB1	6046	BRD2	1
5925	RB1	10131	TRAP1	1
5925	RB1	10620	ARID3B	1
5925	RB1	5933	RBL1	1
5925	RB1	8900	CCNA1	1
5925	RB1	6619	SNAPC3	1
5925	RB1	5928	RBBP4	1
5925	RB1	7799	PRDM2	1
5925	RB1	6839	SUV39H1	1
5925	RB1	8535	CBX4	1
5925	RB1	55957	F25965	1
5925	RB1	6617	SNAPC1	1
1601	DAB2	4087	SMAD2	1
2624	GATA2	3725	JUN	1
2965	GTF2H1	7157	TP53	1
545	ATR	7157	TP53	1
6285	S100B	7157	TP53	1
1006	CDH8	1499	CTNNB1	1
6606	SMN1	7157	TP53	1
6257	RXRB	7068	THRB	1
6257	RXRB	8202	NCOA3	1
6257	RXRB	7067	THRA	1
6257	RXRB	8648	NCOA1	1
6257	RXRB	11214	AKAP13	1
6257	RXRB	8431	NR0B2	1
6257	RXRB	8204	NRIP1	1
6257	RXRB	7376	NR1H2	1
6257	RXRB	8856	NR1I2	1
6257	RXRB	10002	NR2E3	1
996	CDC27	4087	SMAD2	1
1435	CSF1	7124	TNF	1
2099	ESR1	3725	JUN	1
2099	ESR1	4087	SMAD2	1
2099	ESR1	4609	MYC	1
2099	ESR1	3726	JUNB	1
2099	ESR1	25920	COBRA1	1
2099	ESR1	7157	TP53	1
1487	CTBP1	5925	RB1	1
2810	SFN	2908	NR3C1	1
2810	SFN	7157	TP53	1
4771	NF2	29970	SCHIP1	1
7157	TP53	54971	BANP	1
7157	TP53	7874	USP7	1
7157	TP53	7295	TXN	1
7157	TP53	94241	TP53INP1	1
7157	TP53	9013	TAF1C	1
7157	TP53	9232	PTTG1	1
7157	TP53	7157	TP53	1
7157	TP53	25898	RCHY1	1
7157	TP53	10055	SAE1	1
7157	TP53	8794	TNFRSF10C	1
7157	TP53	25942	SIN3A	1
7157	TP53	9656	MDC1	1
7157	TP53	7329	UBE2I	1
7157	TP53	30008	EFEMP2	1
7157	TP53	26287	ANKRD2	1
7157	TP53	7341	SUMO1	1
7157	TP53	10474	TADA3L	1
7157	TP53	8554	PIAS1	1
7157	TP53	8178	ELL	1
7157	TP53	9401	RECQL4	1
7157	TP53	7337	UBE3A	1
7157	TP53	9014	TAF1B	1
7157	TP53	8555	CDC14B	1
7157	TP53	10075	HUWE1	1
7157	TP53	9112	MTA1	1
7157	TP53	7490	WT1	1
7157	TP53	7707	ZNF148	1
7157	TP53	81928	CABLES2	1
7157	TP53	7159	TP53BP2	1
7157	TP53	10498	CARM1	1
7157	TP53	26354	GNL3	1
7157	TP53	51147	ING4	1
7157	TP53	9219	MTA2	1
7157	TP53	23113	PARC	1
7157	TP53	8795	TNFRSF10B	1
7157	TP53	7319	UBE2A	1
7157	TP53	10210	TOPORS	1
7157	TP53	51246	SCOTIN	1
7157	TP53	7486	WRN	1
7157	TP53	204851	HIPK1	1
7157	TP53	80854	SETD7	1
7157	TP53	8575	PRKRA	1
7157	TP53	9540	TP53I3	1
7157	TP53	64326	RFWD2	1
7157	TP53	9015	TAF1A	1
7157	TP53	50484	RRM2B	1
7157	TP53	11244	ZHX1	1
7157	TP53	51741	WWOX	1
7157	TP53	7158	TP53BP1	1
7157	TP53	84289	ING5	1
7157	TP53	28996	HIPK2	1
7157	TP53	10153	CEBPZ	1
7157	TP53	7251	TSG101	1
7157	TP53	7534	YWHAZ	1
7157	TP53	9440	CRSP6	1
7157	TP53	10848	PPP1R13L	1
7157	TP53	7528	YY1	1
7157	TP53	8556	CDC14A	1
7157	TP53	91768	CABLES1	1
7157	TP53	23049	SMG1	1
4193	MDM2	7874	USP7	1
4193	MDM2	8850	PCAF	1
4193	MDM2	23741	CRI1	1
4193	MDM2	6872	TAF1	1
4193	MDM2	4194	MDM4	1
4193	MDM2	7157	TP53	1
4193	MDM2	10524	HTATIP	1
4193	MDM2	5716	PSMD10	1
4193	MDM2	8290	HIST3H3	1
4193	MDM2	5934	RBL2	1
4193	MDM2	6125	RPL5	1
4193	MDM2	6135	RPL11	1
4193	MDM2	121504	HIST4H4	1
4193	MDM2	7341	SUMO1	1
4193	MDM2	7161	TP73	1
4193	MDM2	9261	MAPKAPK2	1
4193	MDM2	5925	RB1	1
4193	MDM2	8554	PIAS1	1
4193	MDM2	4193	MDM2	1
4193	MDM2	27085	MTBP	1
4193	MDM2	5371	PML	1
4193	MDM2	7251	TSG101	1
4193	MDM2	64219	PJA1	1
4193	MDM2	7528	YY1	1
4193	MDM2	8650	NUMB	1
4193	MDM2	6667	SP1	1
182	JAG1	3725	JUN	1
182	JAG1	2353	FOS	1
5300	PIN1	7157	TP53	1
3551	IKBKB	4790	NFKB1	1
604	BCL6	3725	JUN	1
604	BCL6	3726	JUNB	1
604	BCL6	6667	SP1	1
604	BCL6	3727	JUND	1
604	BCL6	7157	TP53	1
1001	CDH3	1499	CTNNB1	1
1053	CEBPE	5925	RB1	1
1053	CEBPE	1869	E2F1	1
1053	CEBPE	4602	MYB	1
1014	CDH16	1499	CTNNB1	1
843	CASP10	9191	DEDD	1
843	CASP10	5925	RB1	1
3054	HCFC1	6880	TAF9	1
3054	HCFC1	6667	SP1	1
142	PARP1	4790	NFKB1	1
142	PARP1	7157	TP53	1
207	AKT1	4193	MDM2	1
207	AKT1	3164	NR4A1	1
330	BIRC3	4790	NFKB1	1
6275	S100A4	7157	TP53	1
632	BGLAP	5925	RB1	1
4773	NFATC2	6880	TAF9	1
2444	FRK	5925	RB1	1
4088	SMAD3	4149	MAX	1
4088	SMAD3	4609	MYC	1
5743	PTGS2	7157	TP53	1
3020	H3F3A	6927	TCF1	1
4089	SMAD4	4149	MAX	1
4089	SMAD4	6667	SP1	1
322	APBB1	7024	TFCP2	1
1326	MAP3K8	4790	NFKB1	1
2971	GTF3A	10133	OPTN	1
1005	CDH7	1499	CTNNB1	1
3726	JUNB	4088	SMAD3	1
3726	JUNB	5599	MAPK8	1
3726	JUNB	10538	BATF	1
3726	JUNB	8061	FOSL1	1
3726	JUNB	122953	JDP2	1
3726	JUNB	4089	SMAD4	1
3726	JUNB	3726	JUNB	1
3726	JUNB	4779	NFE2L1	1
7020	TFAP2A	7157	TP53	1
2963	GTF2F2	3725	JUN	1
2963	GTF2F2	9697	TRAM2	1
2963	GTF2F2	4488	MSX2	1
2963	GTF2F2	6877	TAF5	1
2963	GTF2F2	6908	TBP	1
2963	GTF2F2	27336	HTATSF1	1
2963	GTF2F2	2963	GTF2F2	1
2963	GTF2F2	5434	POLR2E	1
2963	GTF2F2	5430	POLR2A	1
3320	HSP90AA1	4609	MYC	1
3320	HSP90AA1	7157	TP53	1
2959	GTF2B	6880	TAF9	1
3837	KPNB1	7157	TP53	1
7124	TNF	7124	TNF	1
7124	TNF	8570	KHSRP	1
7124	TNF	7133	TNFRSF1B	1
7124	TNF	7132	TNFRSF1A	1
7936	RDBP	25920	COBRA1	1
2908	NR3C1	5763	PTMS	1
2908	NR3C1	9612	NCOR2	1
2908	NR3C1	7295	TXN	1
2908	NR3C1	8805	TRIM24	1
2908	NR3C1	6908	TBP	1
2908	NR3C1	5894	RAF1	1
2908	NR3C1	7157	TP53	1
2908	NR3C1	5449	POU1F1	1
2908	NR3C1	6777	STAT5B	1
2908	NR3C1	7329	UBE2I	1
2908	NR3C1	3303	HSPA1A	1
2908	NR3C1	27043	PELP1	1
2908	NR3C1	7341	SUMO1	1
2908	NR3C1	6598	SMARCB1	1
2908	NR3C1	3725	JUN	1
2908	NR3C1	8991	SELENBP1	1
2908	NR3C1	23054	NCOA6	1
2908	NR3C1	4790	NFKB1	1
2908	NR3C1	3211	HOXB1	1
2908	NR3C1	3320	HSP90AA1	1	1
2908	NR3C1	3557	IL1RN	1
2908	NR3C1	11319	ECD	1
2908	NR3C1	10728	PTGES3	1
2908	NR3C1	3192	HNRPU	1
2908	NR3C1	4791	NFKB2	1
2908	NR3C1	24148	PRPF6	1
2908	NR3C1	5452	POU2F2	1
2908	NR3C1	6774	STAT3	1
2908	NR3C1	5970	RELA	1
2908	NR3C1	6605	SMARCE1	1
2908	NR3C1	8204	NRIP1	1
2908	NR3C1	10499	NCOA2	1
2908	NR3C1	6595	SMARCA2	1	1
2908	NR3C1	7704	ZBTB16	1
2908	NR3C1	5927	JARID1A	1
2908	NR3C1	29893	PSMC3IP	1
2908	NR3C1	5451	POU2F1	1
2908	NR3C1	4691	NCL	1
2908	NR3C1	10155	TRIM28	1
2908	NR3C1	4088	SMAD3	1
2908	NR3C1	3175	ONECUT1	1
2908	NR3C1	7818	DAP3	1
2908	NR3C1	3416	IDE	1
2908	NR3C1	7251	TSG101	1
2908	NR3C1	6776	STAT5A	1
2908	NR3C1	9282	CRSP2	1
2908	NR3C1	8648	NCOA1	1
2908	NR3C1	9611	NCOR1	1
2908	NR3C1	10980	COPS6	1
2908	NR3C1	10891	PPARGC1A	1
2908	NR3C1	7533	YWHAH	1
2908	NR3C1	79039	DDX54	1
2908	NR3C1	4306	NR3C2	1
2908	NR3C1	7041	TGFB1I1	1
2908	NR3C1	6602	SMARCD1	1
5591	PRKDC	7157	TP53	1
354	KLK3	1499	CTNNB1	1
3313	HSPA9B	7157	TP53	1
332	BIRC5	5925	RB1	1
332	BIRC5	1869	E2F1	1
6874	TAF4	11016	ATF7	1
1869	E2F1	10634	GAS2L1	1
1869	E2F1	9150	CTDP1	1
1869	E2F1	5965	RECQL	1
1869	E2F1	23368	PPP1R13B	1
1869	E2F1	94241	TP53INP1	1
1869	E2F1	5245	PHB	1
1869	E2F1	4194	MDM4	1
1869	E2F1	8454	CUL1	1
1869	E2F1	8970	HIST1H2BJ	1
1869	E2F1	4292	MLH1	1
1869	E2F1	8438	RAD54L	1
1869	E2F1	8969	HIST1H2AG	1
1869	E2F1	5934	RBL2	1
1869	E2F1	133746	JMY	1
1869	E2F1	5925	RB1	1
1869	E2F1	54482	CCDC76	1
1869	E2F1	4609	MYC	1
1869	E2F1	55771	PRR11	1
1869	E2F1	7272	TTK	1
1869	E2F1	4436	MSH2	1
1869	E2F1	2965	GTF2H1	1
1869	E2F1	7159	TP53BP2	1
1869	E2F1	8531	CSDA	1
1869	E2F1	5926	ARID4A	1
1869	E2F1	9846	GAB2	1
1869	E2F1	6667	SP1	1
1869	E2F1	1876	E2F6	1
1869	E2F1	6670	SP3	1
1869	E2F1	55837	C14orf11	1
1869	E2F1	11073	TOPBP1	1
1869	E2F1	8370	HIST2H4	1
1869	E2F1	8409	UXT	1
1869	E2F1	6502	SKP2	1
1869	E2F1	4605	MYBL2	1
1869	E2F1	2274	FHL2	1
1869	E2F1	6668	SP2	1
1869	E2F1	56654	NPDC1	1
1869	E2F1	4495	MT1G	1
1869	E2F1	6671	SP4	1
1869	E2F1	8202	NCOA3	1
1869	E2F1	9792	SERTAD2	1
1869	E2F1	8295	TRRAP	1
1869	E2F1	6046	BRD2	1
1869	E2F1	5933	RBL1	1
1869	E2F1	5888	RAD51	1
1869	E2F1	4236	MFAP1	1
1869	E2F1	1874	E2F4	1
1869	E2F1	7027	TFDP1	1
1869	E2F1	8900	CCNA1	1
1869	E2F1	4085	MAD2L1	1
1869	E2F1	4692	NDN	1
1869	E2F1	1869	E2F1	1
1869	E2F1	7298	TYMS	1
1869	E2F1	7029	TFDP2	1
1869	E2F1	1870	E2F2	1
1869	E2F1	23468	CBX5	1
1869	E2F1	5813	PURA	1
2056	EPO	5925	RB1	1
6883	TAF12	11016	ATF7	1
3428	IFI16	7157	TP53	1
4149	MAX	9043	SPAG9	1
4149	MAX	8295	TRRAP	1
4149	MAX	4149	MAX	1
4149	MAX	4335	MNT	1
4149	MAX	4601	MXI1	1
4149	MAX	4609	MYC	1
4149	MAX	7003	TEAD1	1
4149	MAX	4610	MYCL1	1
4149	MAX	4436	MSH2	1
4149	MAX	4613	MYCN	1
4149	MAX	10608	MXD4	1
4149	MAX	83463	MXD3	1
1831	TSC22D3	3725	JUN	1
1831	TSC22D3	2353	FOS	1
1831	TSC22D3	4790	NFKB1	1
4194	MDM4	5925	RB1	1
4194	MDM4	7157	TP53	1
5578	PRKCA	7157	TP53	1
1045	CDX2	6927	TCF1	1
5881	RAC3	6927	TCF1	1
5881	RAC3	29959	NRBP1	1
5881	RAC3	10519	CIB1	1
5881	RAC3	29123	ANKRD11	1
5036	PA2G4	5925	RB1	1
1013	CDH15	1499	CTNNB1	1
2354	FOSB	3726	JUNB	1
3660	IRF2	4790	NFKB1	1
2288	FKBP4	2908	NR3C1	1
1786	DNMT1	5925	RB1	1
1454	CSNK1E	7157	TP53	1
842	CASP9	5925	RB1	1
665	BNIP3L	7157	TP53	1
1523	CUTL1	5925	RB1	1
865	CBFB	9139	CBFA2T2	1
865	CBFB	865	CBFB	1
291	SLC25A4	2908	NR3C1	1
904	CCNT1	4609	MYC	1
4654	MYOD1	7291	TWIST1	1
4654	MYOD1	5925	RB1	1
4654	MYOD1	6667	SP1	1
2972	BRF1	7157	TP53	1
409	ARRB2	4193	MDM2	1
3066	HDAC2	6667	SP1	1
1958	EGR1	3725	JUN	1
1958	EGR1	6667	SP1	1
1958	EGR1	7157	TP53	1
1718	DHCR24	4193	MDM2	1
1718	DHCR24	7157	TP53	1
8837	CFLAR	9191	DEDD	1
811	CALR	2908	NR3C1	1
4609	MYC	5599	MAPK8	1
4609	MYC	23077	MYCBP2	1
4609	MYC	6908	TBP	1
4609	MYC	5894	RAF1	1
4609	MYC	9013	TAF1C	1
4609	MYC	5604	MAP2K1	1
4609	MYC	4869	NPM1	1
4609	MYC	10524	HTATIP	1
4609	MYC	6598	SMARCB1	1
4609	MYC	7161	TP73	1
4609	MYC	5891	RAGE	1
4609	MYC	5925	RB1	1
4609	MYC	9014	TAF1B	1
4609	MYC	5366	PMAIP1	1
4609	MYC	55294	FBXW7	1
4609	MYC	125168	RIBIN	1
4609	MYC	5598	MAPK7	1
4609	MYC	26292	MYCBP	1
4609	MYC	7074	TIAM1	1
4609	MYC	5970	RELA	1
4609	MYC	4801	NFYB	1
4609	MYC	7277	TUBA1	1
4609	MYC	6667	SP1	1
4609	MYC	7709	ZBTB17	1
4609	MYC	4999	ORC2L	1
4609	MYC	7846	TUBA3	1
4609	MYC	7021	TFAP2B	1
4609	MYC	84864	MINA	1
4609	MYC	4691	NCL	1
4609	MYC	5430	POLR2A	1
4609	MYC	10376	K-ALPHA-1	1
4609	MYC	7520	XRCC5	1
4609	MYC	5595	MAPK3	1
4609	MYC	8464	SUPT3H	1
4609	MYC	9015	TAF1A	1
4609	MYC	407975	C13orf25	1
4609	MYC	9043	SPAG9	1
4609	MYC	7278	TUBA2	1
4609	MYC	8295	TRRAP	1
4609	MYC	5933	RBL1	1
4609	MYC	50484	RRM2B	1
4609	MYC	9111	NMI	1
4609	MYC	51807	TUBA8	1
4609	MYC	4802	NFYC	1
4609	MYC	5371	PML	1
4609	MYC	7528	YY1	1
4609	MYC	84875	PARP10	1
4609	MYC	8880	FUBP1	1
1936	EEF1D	7407	VARS	1
1936	EEF1D	2193	FARSLA	1
1936	EEF1D	2617	GARS	1
1936	EEF1D	3895	KTN1	1
1936	EEF1D	1936	EEF1D	1
1936	EEF1D	11035	RIPK3	1
1936	EEF1D	7178	TPT1	1
1459	CSNK2A2	2353	FOS	1
5915	RARB	6257	RXRB	1
1643	DDB2	4609	MYC	1
5422	POLA	5925	RB1	1
5422	POLA	7157	TP53	1
7469	WHSC2	25920	COBRA1	1
355	FAS	1499	CTNNB1	1
3091	HIF1A	3725	JUN	1
3091	HIF1A	5925	RB1	1
3091	HIF1A	4193	MDM2	1
3091	HIF1A	6667	SP1	1
3091	HIF1A	7157	TP53	1
1003	CDH5	1499	CTNNB1	1
1054	CEBPG	2353	FOS	1
4929	NR4A2	6256	RXRA	1
4929	NR4A2	6257	RXRB	1
7528	YY1	11016	ATF7	1
1017	CDK2	5925	RB1	1
1017	CDK2	4087	SMAD2	1
1017	CDK2	1869	E2F1	1
3875	KRT18	9191	DEDD	1
1029	CDKN2A	4193	MDM2	1
1029	CDKN2A	4609	MYC	1
1029	CDKN2A	1869	E2F1	1
3659	IRF1	4790	NFKB1	1
1634	DCN	7124	TNF	1
2005	ELK4	2353	FOS	1
1788	DNMT3A	4609	MYC	1
9230	RAB11B	10133	OPTN	1
5894	RAF1	5925	RB1	1
1147	CHUK	1499	CTNNB1	1
1147	CHUK	4609	MYC	1
1147	CHUK	4790	NFKB1	1
1147	CHUK	7157	TP53	1
598	BCL2L1	7157	TP53	1
2355	FOSL2	3725	JUN	1
2355	FOSL2	3726	JUNB	1
2355	FOSL2	3727	JUND	1
433	ASGR2	29956	LASS2	1
890	CCNA2	1869	E2F1	1
890	CCNA2	7157	TP53	1
6464	SHC1	6667	SP1	1
1997	ELF1	5925	RB1	1
1997	ELF1	4790	NFKB1	1
1997	ELF1	6667	SP1	1
602	BCL3	3725	JUN	1
602	BCL3	1499	CTNNB1	1
602	BCL3	2353	FOS	1
602	BCL3	4790	NFKB1	1
841	CASP8	9191	DEDD	1
841	CASP8	5925	RB1	1
841	CASP8	1499	CTNNB1	1
4297	MLL	6880	TAF9	1
6580	SLC22A1	29956	LASS2	1
7011	TEP1	7157	TP53	1
467	ATF3	3725	JUN	1
467	ATF3	4790	NFKB1	1
467	ATF3	7157	TP53	1
467	ATF3	3727	JUND	1
905	CCNT2	5925	RB1	1
2074	ERCC6	7157	TP53	1
2547	XRCC6	7157	TP53	1
52	ACP1	1499	CTNNB1	1
688	KLF5	4790	NFKB1	1
688	KLF5	2963	GTF2F2	1
302	ANXA2	5245	PHB	1
5602	MAPK10	7157	TP53	1
1453	CSNK1D	7157	TP53	1
768	CA9	1499	CTNNB1	1
5573	PRKAR1A	9465	AKAP7	1
5573	PRKAR1A	8852	AKAP4	1
5573	PRKAR1A	11215	AKAP11	1
5573	PRKAR1A	8165	AKAP1	1
5573	PRKAR1A	5575	PRKAR1B	1
5573	PRKAR1A	11216	AKAP10	1
6929	TCF3	7291	TWIST1	1
4292	MLH1	4609	MYC	1
641	BLM	7157	TP53	1
4176	MCM7	5925	RB1	1
2309	FOXO3A	4087	SMAD2	1
2309	FOXO3A	7157	TP53	1
6714	SRC	6927	TCF1	1
5478	PPIA	5925	RB1	1
2962	GTF2F1	4609	MYC	1
2962	GTF2F1	2963	GTF2F2	1
25	ABL1	5925	RB1	1
25	ABL1	4193	MDM2	1
25	ABL1	7157	TP53	1
2737	GLI3	7291	TWIST1	1
2737	GLI3	4087	SMAD2	1
5728	PTEN	7157	TP53	1
2068	ERCC2	7157	TP53	1
1385	CREB1	2908	NR3C1	1
1385	CREB1	2963	GTF2F2	1
5469	PPARBP	7157	TP53	1
328	APEX1	7157	TP53	1
2648	GCN5L2	4609	MYC	1
2353	FOS	9612	NCOR2	1	1
2353	FOS	6872	TAF1	1
2353	FOS	6908	TBP	1
2353	FOS	2626	GATA4	1
2353	FOS	4773	NFATC2	1
2353	FOS	10538	BATF	1
2353	FOS	3727	JUND	1	1
2353	FOS	3725	JUN	1	1
2353	FOS	5925	RB1	1
2353	FOS	6927	TCF1	1
2353	FOS	7494	XBP1	1
2353	FOS	4286	MITF	1
2353	FOS	3726	JUNB	1	1
2353	FOS	4790	NFKB1	1
2353	FOS	2963	GTF2F2	1
2353	FOS	5371	PML	1
2353	FOS	6722	SRF	1
2353	FOS	8570	KHSRP	1
2353	FOS	8986	RPS6KA4	1
2353	FOS	8648	NCOA1	1
2353	FOS	6885	MAP3K7	1
2353	FOS	5970	RELA	1
2353	FOS	7392	USF2	1
2353	FOS	4094	MAF	1
2353	FOS	25920	COBRA1	1
2353	FOS	6602	SMARCD1	1
1316	KLF6	6667	SP1	1
8772	FADD	9191	DEDD	1
1051	CEBPB	5925	RB1	1
1051	CEBPB	2908	NR3C1	1
1051	CEBPB	4609	MYC	1
1051	CEBPB	4790	NFKB1	1
1051	CEBPB	6880	TAF9	1
1051	CEBPB	1386	ATF2	1
1051	CEBPB	6667	SP1	1
1051	CEBPB	4602	MYB	1
7027	TFDP1	7157	TP53	1
472	ATM	1386	ATF2	1
472	ATM	7157	TP53	1
1655	DDX5	7157	TP53	1
6878	TAF6	6880	TAF9	1
5813	PURA	6667	SP1	1
1649	DDIT3	3725	JUN	1
1649	DDIT3	2353	FOS	1
1649	DDIT3	3727	JUND	1
4780	NFE2L2	5468	PPARG	1
6789	STK4	7157	TP53	1
836	CASP3	9191	DEDD	1
836	CASP3	5925	RB1	1
836	CASP3	1499	CTNNB1	1
2071	ERCC3	7157	TP53	1
1432	MAPK14	3725	JUN	1
1018	CDK3	1869	E2F1	1
2647	BLOC1S1	4149	MAX	1
6598	SMARCB1	7157	TP53	1
1007	CDH9	1499	CTNNB1	1
4790	NFKB1	8091	HMGA2	1
4790	NFKB1	4851	NOTCH1	1
4790	NFKB1	9612	NCOR2	1
4790	NFKB1	7295	TXN	1
4790	NFKB1	4794	NFKBIE	1
4790	NFKB1	6256	RXRA	1
4790	NFKB1	5531	PPP4C	1
4790	NFKB1	10524	HTATIP	1
4790	NFKB1	84617	TUBB6	1
4790	NFKB1	51773	HBXAP	1
4790	NFKB1	10627	MRCL3	1
4790	NFKB1	222643	UNC5CL	1
4790	NFKB1	7175	TPR	1
4790	NFKB1	7278	TUBA2	1
4790	NFKB1	9043	SPAG9	1
4790	NFKB1	8600	TNFSF11	1
4790	NFKB1	23421	ITGB3BP	1
4790	NFKB1	6778	STAT6	1
4790	NFKB1	9908	G3BP2	1
4790	NFKB1	4790	NFKB1	1
4790	NFKB1	4792	NFKBIA	1
4790	NFKB1	347733	TUBB2B	1
4790	NFKB1	10856	RUVBL2	1
4790	NFKB1	8648	NCOA1	1
4790	NFKB1	79155	TNIP2	1
4790	NFKB1	6688	SPI1	1
4790	NFKB1	5970	RELA	1
4790	NFKB1	6774	STAT3	1
4790	NFKB1	9325	TRIP4	1
4790	NFKB1	136319	MTPN	1
3192	HNRPU	4692	NDN	1
5241	PGR	6667	SP1	1
4294	MAP3K10	5245	PHB	1
6241	RRM2	7157	TP53	1
3576	IL8	4790	NFKB1	1
6794	STK11	7157	TP53	1
5705	PSMC5	6667	SP1	1
86	ACTL6A	4609	MYC	1
6872	TAF1	7157	TP53	1
1495	CTNNA1	1499	CTNNB1	1
5055	SERPINB2	5925	RB1	1
2961	GTF2E2	4193	MDM2	1
1938	EEF2	7157	TP53	1
4904	YBX1	7157	TP53	1
596	BCL2	3164	NR4A1	1
596	BCL2	7157	TP53	1
2960	GTF2E1	2963	GTF2F2	1
1052	CEBPD	5925	RB1	1
1052	CEBPD	1869	E2F1	1
4846	NOS3	6667	SP1	1
4682	NUBP1	4692	NDN	1
1956	EGFR	5573	PRKAR1A	1
4331	MNAT1	5925	RB1	1
4331	MNAT1	7157	TP53	1
3643	INSR	4087	SMAD2	1
5325	PLAGL1	7157	TP53	1
4792	NFKBIA	7157	TP53	1
5092	PCBD1	9149	DYRK1B	1
5092	PCBD1	6927	TCF1	1
5928	RBBP4	6667	SP1	1
1875	E2F5	4609	MYC	1
6648	SOD2	6648	SOD2	1
3297	HSF1	6880	TAF9	1
6597	SMARCA4	6927	TCF1	1
6597	SMARCA4	6760	SS18	1
4084	MXD1	4149	MAX	1
4084	MXD1	4609	MYC	1
6760	SS18	8028	MLLT10	1
7572	ZNF24	7727	ZNF174	1
7291	TWIST1	8850	PCAF	1
6877	TAF5	6880	TAF9	1
7024	TFCP2	7024	TFCP2	1
5451	POU2F1	6667	SP1	1
4691	NCL	7157	TP53	1
995	CDC25C	6667	SP1	1
995	CDC25C	7157	TP53	1
6927	TCF1	7088	TLE1	1
6927	TCF1	6927	TCF1	1
6927	TCF1	8467	SMARCA5	1
6927	TCF1	8850	PCAF	1
6927	TCF1	140628	GATA5	1
6927	TCF1	55140	ELP3	1
6927	TCF1	121504	HIST4H4	1
1616	DAXX	2113	ETS1	1
4616	GADD45B	5468	PPARG	1
5594	MAPK1	5925	RB1	1
839	CASP6	5925	RB1	1
5966	REL	6667	SP1	1
1009	CDH11	1499	CTNNB1	1
7153	TOP2A	7157	TP53	1
466	ATF1	3725	JUN	1
6774	STAT3	6927	TCF1	1
7150	TOP1	7157	TP53	1
6667	SP1	6670	SP3	1
6667	SP1	29102	RNASEN	1
6667	SP1	26574	AATF	1
6667	SP1	7704	ZBTB16	1
6667	SP1	7071	KLF10	1
6667	SP1	23517	SKIV2L2	1
6667	SP1	57708	MIER1	1
6667	SP1	30835	CD209	1
6667	SP1	80063	ATF7IP2	1
6667	SP1	7157	TP53	1
6667	SP1	8743	TNFSF10	1
6667	SP1	55729	ATF7IP	1
6667	SP1	55320	C14orf106	1
6667	SP1	23126	POGZ	1
6667	SP1	7025	NR2F1	1
6667	SP1	6671	SP4	1
6667	SP1	6886	TAL1	1
6667	SP1	51341	ZBTB7A	1
6667	SP1	9401	RECQL4	1
6667	SP1	6721	SREBF2	1
6667	SP1	9314	KLF4	1
6667	SP1	6874	TAF4	1
6667	SP1	6720	SREBF1	1
6667	SP1	10848	PPP1R13L	1
6667	SP1	7528	YY1	1
6667	SP1	10291	SF3A1	1
4487	MSX1	7157	TP53	1
4487	MSX1	6667	SP1	1
3164	NR4A1	8202	NCOA3	1
3164	NR4A1	6258	RXRG	1
3164	NR4A1	9612	NCOR2	1
3164	NR4A1	8648	NCOA1	1
3164	NR4A1	8850	PCAF	1
3164	NR4A1	5469	PPARBP	1
3164	NR4A1	5371	PML	1
864	RUNX3	865	CBFB	1
900	CCNG1	4193	MDM2	1
900	CCNG1	7157	TP53	1
3275	PRMT2	5468	PPARG	1
4221	MEN1	4790	NFKB1	1
4495	MT1G	5925	RB1	1
5595	MAPK3	7157	TP53	1
2885	GRB2	5573	PRKAR1A	1
840	CASP7	5925	RB1	1
5657	PRTN3	7124	TNF	1
3202	HOXA5	7291	TWIST1	1
2063	NR2F6	8648	NCOA1	1
2063	NR2F6	7026	NR2F2	1
2063	NR2F6	2908	NR3C1	1
2063	NR2F6	2099	ESR1	1
2063	NR2F6	9068	ANGPTL1	1
196	AHR	5925	RB1	1
196	AHR	6667	SP1	1
196	AHR	2963	GTF2F2	1
4087	SMAD2	5763	PTMS		1
4087	SMAD2	10580	SORBS1		1
4087	SMAD2	2071	ERCC3		1
4087	SMAD2	8664	EIF3S7		1
4087	SMAD2	288	ANK3		1
4087	SMAD2	79654	HECTD3		1
4087	SMAD2	54903	MKS1		1
4087	SMAD2	6838	SURF6		1
4087	SMAD2	6156	RPL30		1
4087	SMAD2	521	ATP5I		1
4087	SMAD2	57556	SEMA6A		1
4087	SMAD2	220988	HNRPA3		1
4087	SMAD2	10992	SF3B2		1
4087	SMAD2	805	CALM2		1
4087	SMAD2	4741	NEF3		1
4087	SMAD2	22999	RIMS1		1
4087	SMAD2	5901	RAN		1
4087	SMAD2	2051	EPHB6		1
4087	SMAD2	3556	IL1RAP		1
4087	SMAD2	1653	DDX1		1
4087	SMAD2	7277	TUBA1		1
4087	SMAD2	57628	DPP10		1
4087	SMAD2	6647	SOD1		1
4087	SMAD2	6133	RPL9		1
4087	SMAD2	4043	LRPAP1		1
4087	SMAD2	23020	ASCC3L1		1
4087	SMAD2	26993	AKAP8L		1
4087	SMAD2	10589	DRAP1		1
4087	SMAD2	481	ATP1B1		1
4087	SMAD2	23085	RAB6IP2		1
4087	SMAD2	10376	K-ALPHA-1		1
4087	SMAD2	2670	GFAP		1
4087	SMAD2	476	ATP1A1		1
4087	SMAD2	6599	SMARCC1		1
4087	SMAD2	27018	NGFRAP1		1
4087	SMAD2	399687	MYO18A		1
4087	SMAD2	81611	ANP32E		1
4087	SMAD2	64397	ZFP106		1
4087	SMAD2	23111	SPG20		1
4087	SMAD2	3066	HDAC2		1
4087	SMAD2	55246	CCDC25		1
4087	SMAD2	23112	TNRC6B		1
4087	SMAD2	55081	IFT57		1
4087	SMAD2	80243	DEPDC2		1
4087	SMAD2	6830	SUPT6H		1
4087	SMAD2	64061	TSPYL2		1
4087	SMAD2	51260	CXorf26		1
4087	SMAD2	9324	HMGN3		1
4087	SMAD2	51773	HBXAP		1
4087	SMAD2	1780	DYNC1I1		1
4087	SMAD2	84340	GFM2		1
4087	SMAD2	3799	KIF5B		1
4087	SMAD2	661	POLR3D		1
4087	SMAD2	83860	TAF3		1
4087	SMAD2	23263	MCF2L		1
4087	SMAD2	51575	C20orf6		1
4087	SMAD2	10541	ANP32B		1
4087	SMAD2	3329	HSPD1		1
4087	SMAD2	4644	MYO5A		1
4087	SMAD2	7150	TOP1		1
4087	SMAD2	9295	SFRS11		1
4087	SMAD2	1114	CHGB		1
4087	SMAD2	56342	PPAN		1
4087	SMAD2	84687	PPP1R9B		1
4087	SMAD2	387	RHOA		1
4087	SMAD2	94104	C21orf66		1
4087	SMAD2	1974	EIF4A2		1
4087	SMAD2	84162	KIAA1109		1
4087	SMAD2	6430	SFRS5		1
4087	SMAD2	9669	EIF5B		1
4087	SMAD2	6857	SYT1		1
4087	SMAD2	2353	FOS		1
4087	SMAD2	51663	ZFR		1
4087	SMAD2	59343	SENP2		1
4087	SMAD2	6189	RPS3A		1
4087	SMAD2	2778	GNAS		1
4087	SMAD2	7175	TPR		1
4087	SMAD2	4673	NAP1L1		1
4087	SMAD2	51382	ATP6V1D		1
4087	SMAD2	6271	S100A1		1
4087	SMAD2	1211	CLTA		1
4087	SMAD2	158931	TCEAL6		1
4087	SMAD2	7013	TERF1		1
4087	SMAD2	7178	TPT1		1
4602	MYB	26059	CAST1		1
4602	MYB	5763	PTMS		1
4602	MYB	25832	NBPF14		1
4602	MYB	55904	MLL5		1
4602	MYB	9739	SETD1A		1
4602	MYB	27253	PCDH17		1
4602	MYB	6383	SDC2		1
4602	MYB	26234	FBXL5		1
4602	MYB	3796	KIF2		1
4602	MYB	27018	NGFRAP1		1
4602	MYB	4685	NCAM2		1
4602	MYB	196441	PSRC2		1
4602	MYB	26019	UPF2		1
4602	MYB	1349	COX7B		1
4602	MYB	53616	ADAM22		1
4602	MYB	9611	NCOR1		1
9191	DEDD	7874	USP7		1
9191	DEDD	334	APLP2		1
9191	DEDD	340543	TCEAL5		1
9191	DEDD	221960	C7orf28B		1
9191	DEDD	5066	PAM		1
9191	DEDD	5274	SERPINI1		1
9191	DEDD	84946	LTV1		1
9191	DEDD	529	ATP6V1E1		1
9191	DEDD	5926	ARID4A		1
9191	DEDD	10350	ABCA9		1
9191	DEDD	65117	FLJ11021		1
57801	HES4	3800	KIF5C		1
57801	HES4	26046	ZNF294		1
57801	HES4	84319	C3orf26		1
57801	HES4	84125	LRRIQ1		1
57801	HES4	5998	RGS3		1
57801	HES4	3326	HSP90AB1		1
57801	HES4	26958	COPG2		1
57801	HES4	84239	ATP13A4		1
57801	HES4	23091	KIAA0853		1
57801	HES4	1933	EEF1B2		1
3727	JUND	8604	SLC25A12		1
3727	JUND	645323	LOC645323		1
3727	JUND	4735	SEPT2		1
3727	JUND	10096	ACTR3		1
1499	CTNNB1	56647	BCCIP		1
1499	CTNNB1	55119	PRPF38B		1
1499	CTNNB1	23112	TNRC6B		1
1499	CTNNB1	6144	RPL21		1
1499	CTNNB1	6171	RPL41		1
1499	CTNNB1	4036	LRP2		1
1499	CTNNB1	9590	AKAP12		1
1499	CTNNB1	8943	AP3D1		1
1499	CTNNB1	51260	CXorf26		1
1499	CTNNB1	84162	KIAA1109		1
1499	CTNNB1	51742	ARID4B		1
1499	CTNNB1	55299	BXDC2		1
1499	CTNNB1	26060	APPL		1
1499	CTNNB1	30011	SH3KBP1		1
1499	CTNNB1	22826	DNAJC8		1
1499	CTNNB1	25909	AHCTF1		1
1499	CTNNB1	84456	L3MBTL3		1
1499	CTNNB1	8125	ANP32A		1
1499	CTNNB1	27347	STK39		1
1499	CTNNB1	1211	CLTA		1
1499	CTNNB1	57471	KIAA1189		1
1499	CTNNB1	9584	RNPC2		1
5468	PPARG	5707	PSMD1		1
5468	PPARG	57680	CHD8		1
5468	PPARG	3326	HSP90AB1		1
5468	PPARG	9448	MAP4K4		1
5468	PPARG	10299	MARCH6		1
5468	PPARG	11100	HNRPUL1		1
5468	PPARG	1191	CLU		1
5468	PPARG	8237	USP11		1
5468	PPARG	528	ATP6V1C1		1
5468	PPARG	3925	STMN1		1
5468	PPARG	203068	TUBB		1
5468	PPARG	55704	KIAA1212		1
5468	PPARG	5621	PRNP		1
5468	PPARG	10133	OPTN		1
6257	RXRB	6655	SOS2		1
6257	RXRB	5763	PTMS		1
6257	RXRB	5530	PPP3CA		1
6257	RXRB	7184	HSP90B1		1
6257	RXRB	4155	MBP		1
6257	RXRB	3798	KIF5A		1
6257	RXRB	22930	RAB3GAP1		1
6257	RXRB	521	ATP5I		1
6257	RXRB	79982	DNAJB14		1
6257	RXRB	90411	MCFD2		1
6257	RXRB	26060	APPL		1
6257	RXRB	8661	EIF3S10		1
6257	RXRB	7415	VCP		1
6257	RXRB	55219	TMEM57		1
6257	RXRB	84220	RGPD5		1
6257	RXRB	11051	NUDT21		1
6257	RXRB	53407	STX18		1
6257	RXRB	9905	RUTBC1		1
6257	RXRB	6902	TBCA		1
6257	RXRB	1211	CLTA		1
6257	RXRB	10815	CPLX1		1
6257	RXRB	6741	SSB		1
6257	RXRB	774	CACNA1B		1
6257	RXRB	147495	APCDD1		1
6257	RXRB	55175	KLHL11		1
6257	RXRB	5046	PCSK6		1
7157	TP53	287	ANK2		1
7157	TP53	10499	NCOA2		1
7978	MTERF	51280	GOLPH2		1
7978	MTERF	8727	CTNNAL1		1
7978	MTERF	287	ANK2		1
7978	MTERF	23233	SEC15L2		1
7978	MTERF	6418	SET		1
7978	MTERF	134218	DNAJA5		1
7978	MTERF	55714	ODZ3		1
7978	MTERF	54843	SYTL2		1
7978	MTERF	1639	DCTN1		1
7978	MTERF	4131	MAP1B		1
3726	JUNB	334	APLP2		1
3726	JUNB	23358	USP24		1
3726	JUNB	152687	ZNF595		1
3726	JUNB	4133	MAP2		1
3726	JUNB	374920	LOC374920		1
3726	JUNB	374928	MGC4728		1
3726	JUNB	10915	TCERG1		1
3726	JUNB	5569	PKIA		1
2963	GTF2F2	27332	ZNF638		1
2963	GTF2F2	10451	VAV3		1
2963	GTF2F2	255758	MGC33212		1
2963	GTF2F2	10526	IPO8		1
2963	GTF2F2	10905	MAN1A2		1
2963	GTF2F2	2181	ACSL3		1
2963	GTF2F2	51185	CRBN		1
2963	GTF2F2	22883	CLSTN1		1
2963	GTF2F2	8697	CDC23		1
2963	GTF2F2	1345	COX6C		1
2963	GTF2F2	6157	RPL27A		1
2963	GTF2F2	7018	TF		1
2963	GTF2F2	351	APP		1
2963	GTF2F2	4673	NAP1L1		1
2963	GTF2F2	476	ATP1A1		1
2963	GTF2F2	64422	ATG3		1
2963	GTF2F2	11329	STK38		1
2963	GTF2F2	8725	C19orf2		1
2963	GTF2F2	5306	PITPNA		1
2963	GTF2F2	165918	RNF168		1
2963	GTF2F2	51575	C20orf6		1
2963	GTF2F2	7993	UBXD6		1
2963	GTF2F2	5202	PFDN2		1
2963	GTF2F2	23272	C3orf63		1
1869	E2F1	9612	NCOR2		1
1869	E2F1	728788	LOC728788		1
1869	E2F1	10283	SDCCAG10		1
1869	E2F1	9399	STOML1		1
1869	E2F1	51035	LOC51035		1
1869	E2F1	6772	STAT1		1
1869	E2F1	51742	ARID4B		1
1869	E2F1	10752	CHL1		1
1869	E2F1	51335	NGRN		1
1869	E2F1	7277	TUBA1		1
4149	MAX	23061	KIAA0676		1
4149	MAX	9092	SART1		1
4149	MAX	11224	RPL35		1
4149	MAX	7846	TUBA3		1
4149	MAX	54737	HSMPP8		1
4149	MAX	2550	GABBR1		1
4149	MAX	5713	PSMD7		1
4149	MAX	2495	FTH1		1
4149	MAX	9049	AIP		1
4149	MAX	10014	HDAC5		1
4149	MAX	6164	RPL34		1
4149	MAX	10382	TUBB4		1
4149	MAX	1778	DYNC1H1		1
4149	MAX	3181	HNRPA2B1		1
4149	MAX	1938	EEF2		1
4149	MAX	2521	FUS		1
4149	MAX	3098	HK1		1
4149	MAX	2686	GGTL3		1
4149	MAX	5413	SEPT5		1
4149	MAX	1819	DRG2		1
4149	MAX	293	SLC25A6		1
4149	MAX	5214	PFKP		1
865	CBFB	667	DST		1
865	CBFB	57282	SLC4A10		1
865	CBFB	3725	JUN		1
865	CBFB	5917	RARS		1
865	CBFB	11224	RPL35		1
865	CBFB	8522	GAS7		1
865	CBFB	4133	MAP2		1
865	CBFB	55726	C12orf11		1
865	CBFB	10153	CEBPZ		1
865	CBFB	5862	RAB2		1
865	CBFB	2923	PDIA3		1
865	CBFB	1294	COL7A1		1
865	CBFB	8404	SPARCL1		1
865	CBFB	6857	SYT1		1
865	CBFB	170506	DHX36		1
865	CBFB	351	APP		1
865	CBFB	5567	PRKACB		1
4609	MYC	10090	UST		1
4609	MYC	10580	SORBS1		1
4609	MYC	8019	BRD3		1
4609	MYC	5504	PPP1R2		1
4609	MYC	23641	LDOC1		1
4609	MYC	2747	GLUD2		1
4609	MYC	9113	LATS1		1
4609	MYC	6319	SCD		1
4609	MYC	26058	TNRC15		1
4609	MYC	9702	CEP57		1
4609	MYC	7343	UBTF		1
4609	MYC	3382	ICA1		1
4609	MYC	4673	NAP1L1		1
4609	MYC	51088	KLHL5		1
4609	MYC	57498	KIDINS220		1
4609	MYC	9201	DCAMKL1		1
4609	MYC	7158	TP53BP1		1
4609	MYC	23645	PPP1R15A		1
4609	MYC	6418	SET		1
4609	MYC	6625	SNRP70		1
4609	MYC	3066	HDAC2		1
4609	MYC	7150	TOP1		1
5573	PRKAR1A	340543	TCEAL5		1
5573	PRKAR1A	4659	PPP1R12A		1
5573	PRKAR1A	9481	SLC25A27		1
5573	PRKAR1A	10087	COL4A3BP		1
5573	PRKAR1A	4691	NCL		1
5573	PRKAR1A	84707	BEX2		1
5573	PRKAR1A	6218	RPS17		1
5573	PRKAR1A	10075	HUWE1		1
5573	PRKAR1A	6711	SPTBN1		1
5573	PRKAR1A	2547	XRCC6		1
5573	PRKAR1A	6418	SET		1
5573	PRKAR1A	5066	PAM		1
5573	PRKAR1A	29117	BRD7		1
5573	PRKAR1A	128866	CHMP4B		1
5573	PRKAR1A	10541	ANP32B		1
5573	PRKAR1A	6812	STXBP1		1
5573	PRKAR1A	1000	CDH2		1
5573	PRKAR1A	23070	KIAA0082		1
5573	PRKAR1A	6749	SSRP1		1
2353	FOS	81846	SBF2		1
2353	FOS	5318	PKP2		1
2353	FOS	130916	MTERFD2		1
2353	FOS	521	ATP5I		1
2353	FOS	7692	ZNF133		1
2353	FOS	5495	PPM1B		1
2353	FOS	351	APP		1
2353	FOS	3303	HSPA1A		1
2353	FOS	9372	ZFYVE9		1
2353	FOS	6218	RPS17		1
2353	FOS	4741	NEF3		1
2353	FOS	9204	ZMYM6		1
2353	FOS	51138	COPS4		1
2353	FOS	9478	CABP1		1
2353	FOS	10180	RBM6		1
2353	FOS	26033	ATRNL1		1
2353	FOS	83660	TLN2		1
2353	FOS	55379	LRRC59		1
2353	FOS	51329	ARL6IP4		1
2353	FOS	6230	RPS25		1
2353	FOS	23271	CAMSAP1L1		1
2353	FOS	4691	NCL		1
2353	FOS	5411	PNN		1
2353	FOS	81887	LAS1L		1
2353	FOS	90441	ZNF622		1
2353	FOS	81611	ANP32E		1
2353	FOS	1191	CLU		1
2353	FOS	81608	FIP1L1		1
2353	FOS	63876	PKNOX2		1
2353	FOS	339965	FLJ25770		1
2353	FOS	57634	EP400		1
2353	FOS	7184	HSP90B1		1
2353	FOS	4659	PPP1R12A		1
2353	FOS	6830	SUPT6H		1
2353	FOS	10905	MAN1A2		1
2353	FOS	23223	KIAA0690		1
2353	FOS	80829	ZFP91		1
2353	FOS	10946	SF3A3		1
2353	FOS	29889	GNL2		1
2353	FOS	6000	RGS7		1
2353	FOS	51280	GOLPH2		1
2353	FOS	57282	SLC4A10		1
2353	FOS	9130	FAM50A		1
2353	FOS	333	APLP1		1
2353	FOS	280	AMY2B		1
2353	FOS	9168	TMSB10		1
2353	FOS	9360	PPIG		1
2353	FOS	6205	RPS11		1
2353	FOS	51575	C20orf6		1
2353	FOS	730382	LOC730382		1
2353	FOS	26135	SERBP1		1
2353	FOS	23270	TSPYL4		1
2353	FOS	114049	WBSCR22		1
2353	FOS	51652	VPS24		1
2353	FOS	9782	MATR3		1
2353	FOS	9284	NPIP		1
2353	FOS	4140	MARK3		1
2353	FOS	4131	MAP1B		1
2353	FOS	3423	IDS		1
2353	FOS	7175	TPR		1
2353	FOS	23287	AGTPBP1		1
2353	FOS	6418	SET		1
2353	FOS	347733	TUBB2B		1
2353	FOS	22834	ZNF652		1
2353	FOS	27101	CACYBP		1
2353	FOS	84280	BTBD10		1
2353	FOS	7529	YWHAB		1
2353	FOS	10600	USP16		1
29956	LASS2	3320	HSP90AA1		1
29956	LASS2	9568	GABBR2		1
29956	LASS2	8874	ARHGEF7		1
29956	LASS2	23095	KIF1B		1
29956	LASS2	10213	PSMD14		1
29970	SCHIP1	5763	PTMS		1
29970	SCHIP1	11162	NUDT6		1
29970	SCHIP1	353355	ZNF233		1
29970	SCHIP1	60592	SCOC		1
29970	SCHIP1	29953	TRHDE		1
29970	SCHIP1	23770	FKBP8		1
29970	SCHIP1	10565	ARFGEF1		1
29970	SCHIP1	2495	FTH1		1
29970	SCHIP1	1937	EEF1G		1
29970	SCHIP1	51735	RAPGEF6		1
29970	SCHIP1	23091	KIAA0853		1
29970	SCHIP1	805	CALM2		1
29970	SCHIP1	84991	RBM17		1
29970	SCHIP1	6801	STRN		1
29970	SCHIP1	9738	CP110		1
29970	SCHIP1	10598	AHSA1		1
29970	SCHIP1	4747	NEFL		1
29970	SCHIP1	10270	AKAP8		1
29970	SCHIP1	11188	NISCH		1
29970	SCHIP1	29970	SCHIP1		1
29970	SCHIP1	26019	UPF2		1
29970	SCHIP1	26054	SENP6		1
29970	SCHIP1	3306	HSPA2		1
29970	SCHIP1	51650	MRPS33		1
29970	SCHIP1	55827	IQWD1		1
29970	SCHIP1	404734	MASK-BP3		1
29970	SCHIP1	55193	PB1		1
29970	SCHIP1	115294	PCMTD1		1
29970	SCHIP1	5710	PSMD4		1
29970	SCHIP1	7114	TMSB4X		1
29970	SCHIP1	51602	NOP5/NOP58		1
29970	SCHIP1	7415	VCP		1
29970	SCHIP1	6546	SLC8A1		1
29970	SCHIP1	4131	MAP1B		1
29970	SCHIP1	5515	PPP2CA		1
29970	SCHIP1	4673	NAP1L1		1
29970	SCHIP1	2957	GTF2A1		1
29970	SCHIP1	7857	SCG2		1
29970	SCHIP1	4133	MAP2		1
29970	SCHIP1	4685	NCAM2		1
29970	SCHIP1	8925	HERC1		1
29970	SCHIP1	92689	LOC92689		1
29970	SCHIP1	6741	SSB		1
29970	SCHIP1	8237	USP11		1
29970	SCHIP1	55719	C10orf6		1
29970	SCHIP1	11124	FAF1		1
29970	SCHIP1	9839	ZFHX1B		1
5092	PCBD1	23040	MYT1L		1
5092	PCBD1	6595	SMARCA2		1
5092	PCBD1	27243	CHMP2A		1
5092	PCBD1	23215	BAT2D1		1
5092	PCBD1	22863	KIAA0831		1
5092	PCBD1	9984	THOC1		1
5092	PCBD1	6767	ST13		1
5092	PCBD1	4594	MUT		1
5092	PCBD1	10383	TUBB2C		1
5092	PCBD1	3798	KIF5A		1
5092	PCBD1	7095	TLOC1		1
5092	PCBD1	3312	HSPA8		1
5092	PCBD1	6229	RPS24		1
5092	PCBD1	4691	NCL		1
5092	PCBD1	22985	ACIN1		1
5092	PCBD1	63827	BCAN		1
5092	PCBD1	6857	SYT1		1
5092	PCBD1	351	APP		1
5092	PCBD1	4131	MAP1B		1
5092	PCBD1	3799	KIF5B		1
5092	PCBD1	57579	KIAA1411		1
5092	PCBD1	53353	LRP1B		1
5092	PCBD1	10054	UBA2		1
5092	PCBD1	4792	NFKBIA		1
5092	PCBD1	10814	CPLX2		1
5092	PCBD1	9053	MAP7		1
5092	PCBD1	6206	RPS12		1
5092	PCBD1	192111	PGAM5		1
5092	PCBD1	478	ATP1A3		1
6648	SOD2	80011	NIP30		1
6648	SOD2	643665	LOC643665		1
6648	SOD2	6595	SMARCA2		1
6648	SOD2	7184	HSP90B1		1
6648	SOD2	5034	P4HB		1
6648	SOD2	51143	DYNC1LI1		1
6648	SOD2	6144	RPL21		1
6648	SOD2	9805	SCRN1		1
6648	SOD2	8467	SMARCA5		1
6648	SOD2	7799	PRDM2		1
6648	SOD2	23505	TMEM131		1
6648	SOD2	2804	GOLGB1		1
6648	SOD2	51186	WBP5		1
7572	ZNF24	6167	RPL37		1
7572	ZNF24	27332	ZNF638		1
7572	ZNF24	84284	C1orf57		1
7572	ZNF24	5763	PTMS		1
7572	ZNF24	3146	HMGB1		1
7572	ZNF24	23190	UBXD2		1
7572	ZNF24	577	BAI3		1
7572	ZNF24	7095	TLOC1		1
7572	ZNF24	23518	R3HDM1		1
7572	ZNF24	1191	CLU		1
7572	ZNF24	22950	SLC4A1AP		1
7572	ZNF24	55605	KIF21A		1
7572	ZNF24	92737	DNER		1
7572	ZNF24	6018	RLF		1
7572	ZNF24	23284	LPHN3		1
6667	SP1	57584	ARHGAP21		1
6667	SP1	4673	NAP1L1		1
6667	SP1	25871	C3orf17		1
6667	SP1	547	KIF1A		1
6667	SP1	1107	CHD3		1
6667	SP1	9478	CABP1		1
6667	SP1	9360	PPIG		1
6667	SP1	10905	MAN1A2		1
6667	SP1	10713	USP39		1
6667	SP1	1655	DDX5		1
6667	SP1	5007	OSBP		1
6667	SP1	26054	SENP6		1
6667	SP1	1901	EDG1		1
6667	SP1	7167	TPI1		1
6667	SP1	5394	EXOSC10		1
3725	JUN	22924	MAPRE3		1
3725	JUN	9498	SLC4A8		1
3725	JUN	7846	TUBA3		1
3725	JUN	7916	BAT2		1
3725	JUN	57120	GOPC		1
3725	JUN	3312	HSPA8		1
3725	JUN	29888	STRN4		1
3725	JUN	441454	LOC441454		1
3725	JUN	55212	BBS7		1
3725	JUN	10488	CREB3		1
3725	JUN	29911	HOOK2		1
3725	JUN	351	APP		1
3725	JUN	8239	USP9X		1
3725	JUN	334	APLP2		1
3725	JUN	4741	NEF3		1
3725	JUN	8925	HERC1		1
3725	JUN	2050	EPHB4		1
3725	JUN	10752	CHL1		1
3725	JUN	3320	HSP90AA1		1
3725	JUN	2571	GAD1		1
3725	JUN	203068	TUBB		1
4692	NDN	4691	NCL		1
4692	NDN	51678	MPP6		1
1386	ATF2	6744	SSFA2		1
1386	ATF2	509	ATP5C1		1
25920	COBRA1	140597	TCEAL2		1
25920	COBRA1	3313	HSPA9B		1
25920	COBRA1	8467	SMARCA5		1
25920	COBRA1	29993	PACSIN1		1
25920	COBRA1	10656	KHDRBS3		1
25920	COBRA1	4257	MGST1		1
25920	COBRA1	8562	DENR		1
6880	TAF9	6154	RPL26		1
6880	TAF9	11224	RPL35		1
6880	TAF9	720	C4A		1
6880	TAF9	29896	TRA2A		1
6880	TAF9	287	ANK2		1
6880	TAF9	54801	FAM29A		1
6880	TAF9	51035	LOC51035		1
6880	TAF9	23673	STX12		1
6880	TAF9	9638	FEZ1		1
6880	TAF9	6597	SMARCA4		1
6880	TAF9	6229	RPS24		1
6880	TAF9	521	ATP5I		1
6880	TAF9	23301	EHBP1		1
6880	TAF9	351	APP		1
6880	TAF9	27043	PELP1		1
6880	TAF9	57794	SF4		1
6880	TAF9	92912	UBE2Q2		1
6880	TAF9	57515	SERINC1		1
6880	TAF9	6902	TBCA		1
6880	TAF9	1108	CHD4		1
6880	TAF9	10499	NCOA2		1
2113	ETS1	3146	HMGB1		1
2113	ETS1	116966	WDR17		1
2113	ETS1	60592	SCOC		1
2113	ETS1	8664	EIF3S7		1
2113	ETS1	1059	CENPB		1
2113	ETS1	148423	C1orf52		1
2113	ETS1	153527	ZMAT2		1
2113	ETS1	16	AARS		1
2113	ETS1	23521	RPL13A		1
2113	ETS1	3727	JUND		1
2113	ETS1	1595	CYP51A1		1
2113	ETS1	4741	NEF3		1
2113	ETS1	334	APLP2		1
2113	ETS1	54680	C1orf181		1
2113	ETS1	51400	PPME1		1
2113	ETS1	9678	PHF14		1
2113	ETS1	5887	RAD23B		1
2113	ETS1	7267	TTC3		1
2113	ETS1	27034	ACAD8		1
2113	ETS1	51329	ARL6IP4		1
2113	ETS1	9353	SLIT2		1
2113	ETS1	221061	C10orf38		1
2113	ETS1	26135	SERBP1		1
2113	ETS1	988	CDC5L		1
2113	ETS1	9295	SFRS11		1
2113	ETS1	6595	SMARCA2		1
2113	ETS1	283820	NOMO2		1
2113	ETS1	9900	SV2A		1
2113	ETS1	85012	TCEAL3		1
2113	ETS1	4691	NCL		1
2113	ETS1	51742	ARID4B		1
2113	ETS1	9669	EIF5B		1
2113	ETS1	8661	EIF3S10		1
2113	ETS1	81887	LAS1L		1
2113	ETS1	51663	ZFR		1
2113	ETS1	2778	GNAS		1
2113	ETS1	7248	TSC1		1
2113	ETS1	2058	EPRS		1
2113	ETS1	5204	PFDN5		1
2113	ETS1	29082	CHMP4A		1
2113	ETS1	55250	STATIP1		1
2113	ETS1	6418	SET		1
2113	ETS1	10814	CPLX2		1
2113	ETS1	79415	C17orf62		1
2113	ETS1	22990	PCNX		1
2113	ETS1	26750	RPS6KC1		1
6258	RXRG	7707	ZNF148		1
5308	PITX2	5982	RFC2		1
5308	PITX2	57512	GPR158		1
5308	PITX2	5567	PRKACB		1
10133	OPTN	2778	GNAS		1
10133	OPTN	3313	HSPA9B		1
10133	OPTN	8831	SYNGAP1		1
10133	OPTN	91942	mimitin		1
10133	OPTN	23172	KIAA0157		1
10133	OPTN	27089	UQCRQ		1
10133	OPTN	1059	CENPB		1
10133	OPTN	6168	RPL37A		1
10133	OPTN	10969	EBNA1BP2		1
10133	OPTN	153527	ZMAT2		1
10133	OPTN	1982	EIF4G2		1
10133	OPTN	23499	MACF1		1
10133	OPTN	55719	C10orf6		1
10133	OPTN	10313	RTN3		1
5245	PHB	23469	PHF3		1
5245	PHB	79836	LONRF3		1
5245	PHB	1804	DPP6		1
5245	PHB	102	ADAM10		1
5245	PHB	6334	SCN8A		1
5245	PHB	3326	HSP90AB1		1
5245	PHB	51260	CXorf26		1
5245	PHB	55193	PB1		1
5245	PHB	1345	COX6C		1
5245	PHB	23085	RAB6IP2		1
5245	PHB	8239	USP9X		1
5245	PHB	4131	MAP1B		1
5245	PHB	2962	GTF2F1		1
5245	PHB	140597	TCEAL2		1
5245	PHB	4673	NAP1L1		1
5245	PHB	161835	FSIP1		1
5245	PHB	84251	SGIP1		1
5245	PHB	6418	SET		1
5245	PHB	5757	PTMA		1
5245	PHB	1106	CHD2		1
5245	PHB	10541	ANP32B		1
5245	PHB	170506	DHX36		1
5245	PHB	11215	AKAP11		1
5245	PHB	51503	HSPC148		1
5245	PHB	55176	SEC61A2		1
5925	RB1	55435	C4orf16		1
5925	RB1	4741	NEF3		1
5925	RB1	4691	NCL		1
5925	RB1	2936	GSR		1
5925	RB1	5414	SEPT4		1
5925	RB1	8106	PABPN1		1
4193	MDM2	7184	HSP90B1		1
4193	MDM2	5789	PTPRD		1
4193	MDM2	3798	KIF5A		1
4193	MDM2	23500	DAAM2		1
4193	MDM2	7692	ZNF133		1
4193	MDM2	11231	SEC63		1
4193	MDM2	2950	GSTP1		1
4193	MDM2	1937	EEF1G		1
4193	MDM2	6728	SRP19		1
4193	MDM2	351	APP		1
4193	MDM2	10471	PFDN6		1
4193	MDM2	3727	JUND		1
4193	MDM2	3725	JUN		1
4193	MDM2	4741	NEF3		1
4193	MDM2	9126	CSPG6		1
4193	MDM2	7257	TSNAX		1
4193	MDM2	3480	IGF1R		1
4193	MDM2	54680	C1orf181		1
4193	MDM2	4201	MEA1		1
4193	MDM2	284695	ZNF326		1
4193	MDM2	10724	MGEA5		1
4193	MDM2	6902	TBCA		1
4193	MDM2	64710	NUCKS1		1
4193	MDM2	24148	PRPF6		1
4193	MDM2	90321	LOC90321		1
4193	MDM2	55967	NDUFA12		1
4193	MDM2	25963	TMEM87A		1
4193	MDM2	221061	C10orf38		1
4193	MDM2	1131	CHRM3		1
4193	MDM2	11152	WDR45		1
4193	MDM2	5923	RASGRF1		1
4193	MDM2	23215	BAT2D1		1
4193	MDM2	51650	MRPS33		1
4193	MDM2	127254	C1orf173		1
4193	MDM2	2060	EPS15		1
4193	MDM2	9448	MAP4K4		1
4193	MDM2	3312	HSPA8		1
4193	MDM2	22883	CLSTN1		1
4193	MDM2	9638	FEZ1		1
4193	MDM2	7468	WHSC1		1
4193	MDM2	7430	VIL2		1
4193	MDM2	6262	RYR2		1
4193	MDM2	140890	SFRS12		1
4193	MDM2	4691	NCL		1
4193	MDM2	4141	MARS		1
4193	MDM2	5315	PKM2		1
4193	MDM2	6157	RPL27A		1
4193	MDM2	5955	RCN2		1
4193	MDM2	10458	BAIAP2		1
4193	MDM2	4673	NAP1L1		1
4193	MDM2	9459	ARHGEF6		1
4193	MDM2	6804	STX1A		1
4193	MDM2	1616	DAXX		1
4193	MDM2	4133	MAP2		1
4193	MDM2	6418	SET		1
4193	MDM2	22890	ZBTB1		1
4193	MDM2	1191	CLU		1
4193	MDM2	2555	GABRA2		1
4193	MDM2	53343	NUDT9		1
4193	MDM2	203068	TUBB		1
4193	MDM2	54883	CCDC49		1
11016	ATF7	8725	C19orf2		1
11016	ATF7	54940	OCIAD1		1
11016	ATF7	129531	LOC129531		1
11016	ATF7	43	ACHE		1
11016	ATF7	5921	RASA1		1
11016	ATF7	51347	TAOK3		1
7124	TNF	833	CARS		1
7124	TNF	51650	MRPS33		1
7124	TNF	6767	ST13		1
7124	TNF	51559	NT5DC3		1
7124	TNF	6695	SPOCK1		1
7124	TNF	9919	KIAA0310		1
7124	TNF	285141	LOC285141		1
7124	TNF	132660	DKFZp686L1814		1
7124	TNF	805	CALM2		1
7124	TNF	488	ATP2A2		1
7124	TNF	7857	SCG2		1
7124	TNF	10569	SLU7		1
7124	TNF	4747	NEFL		1
7124	TNF	5803	PTPRZ1		1
7124	TNF	8404	SPARCL1		1
7124	TNF	6222	RPS18		1
2908	NR3C1	23469	PHF3		1
2908	NR3C1	64061	TSPYL2		1
2908	NR3C1	1059	CENPB		1
2908	NR3C1	9967	THRAP3		1
2908	NR3C1	2037	EPB41L2		1
2908	NR3C1	3895	KTN1		1
2908	NR3C1	805	CALM2		1
2908	NR3C1	9414	TJP2		1
2908	NR3C1	140597	TCEAL2		1
2908	NR3C1	158399	ZNF483		1
2908	NR3C1	23136	EPB41L3		1
2908	NR3C1	8125	ANP32A		1
2908	NR3C1	9729	KIAA0408		1
2908	NR3C1	7267	TTC3		1
[truncated: 174 more rows]
